# Supplementary material for: Catalyst-free 1,6-conjugate addition of indoles and 4-hydroxycoumarins topara-quinone methides: synthesis of unsymmetrical triarylmethanes
Source: Royal Society of Chemistry journal article supplement (doi:10.1039/d0ob01789b), 2020-01-01
Supplement: d0ob01789b1.pdf [file d0ob01789b1.pdf]

**–Electronic Supporting Information –**

**Catalyst-free 1,6-conjugate addition of indoles  
and 4-hydroxycoumarins to *para*-quinone  
methides: synthesis of unsymmetrical  
triarylmethanes**

Subramani Kumaran, Mohan Prabhakaran, Narayanan Mariyammal  
and Kanniyappan Parthasarathy\*

Department of Organic Chemistry,  
University of Madras, Chennai 600025, Tamil nadu.  
e-mail: [kparthasarathy@unom.ac.in](mailto:kparthasarathy@unom.ac.in)

| Table of Contents                                                                                             | Page No |
|---------------------------------------------------------------------------------------------------------------|---------|
| General information                                                                                           | 3       |
| General procedure for 1,6 conjugate addition reaction of indoles with <i>para</i> -quinone methides           | 3       |
| General procedure for 1,6 conjugate addition reaction of 4-hydroxycoumarin with <i>para</i> -quinone methides | 4       |
| General procedure for metal-catalyzed annulations reaction                                                    | 5       |
| <sup>1</sup> H NMR, <sup>13</sup> C NMR and MS data                                                           | 6       |
| References                                                                                                    | 22      |
| Copies of <sup>1</sup> H and <sup>13</sup> C NMR Spectra                                                      | 23      |
| ORTEP Diagram and X-ray Data of <b>3j</b>                                                                     | 59      |

## General information

All product mixtures were analysed by thin layer chromatography using aluminium foil backed silica TLC plates. UV-active compounds were detected with a UV lamp ( $\lambda = 254$  nm). For flash column chromatography, silica gel (230-400 mesh particle size) was used as stationary phase.  $^1\text{H}$  and  $^{13}\text{C}$  NMR spectra were recorded either on a Bruker 300 MHz in deuterated chloroform at 25 °C. Chemical shifts ( $\delta$ ) are reported in ppm, and spin-spin coupling constants ( $J$ ) are given in Hz, while multiplicities are abbreviated by br s (broad singlet), s (singlet), d (doublet), t (triplet), q (quartet) m (multiplet) and dd (doublet of doublet). High resolution mass spectra (HRMS) were recorded on Xevo G2S QToF (ESI) instrument.

All solvents were dried according to known methods and distilled prior to use.<sup>1</sup> All *p*-quinonemethides **2a-n**<sup>2</sup> were synthesized according to literature procedures. The  $[\text{Cp}^*\text{CoI}_2\text{CO}]^3$  was prepared according to the literature protocols. All other reagents were purchased from Sigma-Aldrich, Alfa Aesar, Avra, Spectrochem, SRL Pvt. Ltd., India and used without further purification.

## General procedure for the synthesis of indole based triarylmethanes

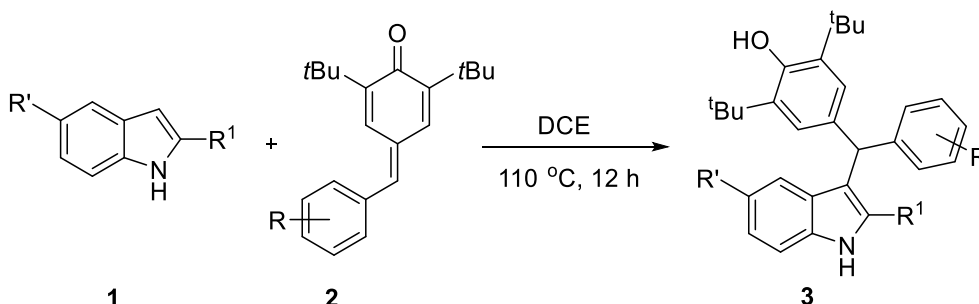

Round bottom (25 mL) flask fixed with refluxing condenser, contain a mixture of indole **1a** (0.51mmol) and 4-benzylidene-2,6-di-*tert*-butylcyclohexa-2,5-dien-1-one **2a** (0.51mmol) in DCE (4 mL). The reaction mixture was allowed to reflux at 110 °C for 12 h. After completion of reaction (monitor by TLC), solvent was reduced under vacuum. The residue was carefully washed with *n*-hexane to afford the desired pure product **3** (or) crude product was purified by a silica gel column chromatography using hexane–EtOAc as eluent to give pure product.

(or)

A Sealed tube (10 mL) containing indole **1a** (0.51 mmol) and 4-benzylidene-2,6-di-*tert*-butylcyclohexa-2,5-dien-1-one **2a** (0.51 mmol), then, 1,2-DCE (2.5 mL), were added to the system via a syringe and the reaction mixture was allowed to stir at 110 °C for 12 h. After completion of reaction (monitor by TLC), solvent was reduced under vacuum. The residue was carefully washed with *n*-hexane to afford the desired pure product **3** (or) crude product was purified by a silica gel column chromatography using hexane–EtOAc as eluent to give pure product.

Similar experimental procedure was applied for the reaction of indole **1b-f** with substituted *p*-QMs **2b-n**.

#### General procedure for the synthesis of 4-hydroxycoumarin based triarylmethanes:

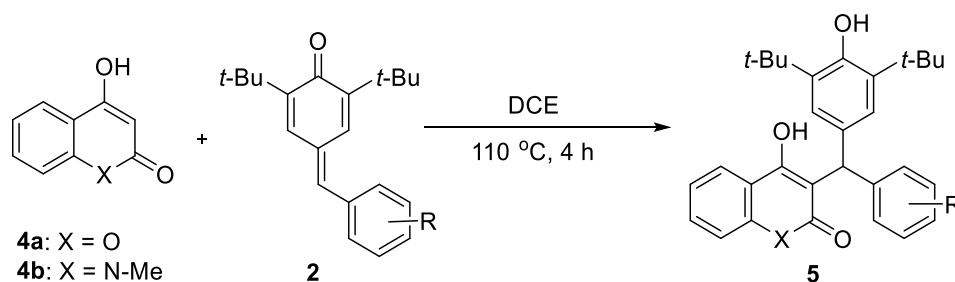

Round bottom flask (25 mL) contain a mixture of 4-hydroxy coumarin **4a** (0.37 mmol) and 4-benzylidene-2,6-di-*tert*-butylcyclohexa-2,5-dien-1-one **2a** (0.37mmol) in DCE (4 mL). The reaction mixture was allowed to reflux at 110 °C for 4h. After completion of reaction (monitor by TLC), solvent was reduced under vacuum. The residue was carefully washed with *n*-hexane to afford the desired pure product **4**.

(or)

A Sealed tube (10 mL) containing 4-hydroxycoumarin **1a** (0.37 mmol) and 4-benzylidene-2,6-di-*tert*-butylcyclohexa-2,5-dien-1-one **2a** (0.37 mmol), then, 1,2-DCE (2 mL), were added to the system via a syringe and the reaction mixture was allowed to stir at 110 °C for 4 h. After completion of reaction (monitor by TLC), solvent was reduced under vacuum. The residue was carefully washed with *n*-hexane to afford the desired pure product **4**.

Similar experimental procedure was applied for the reaction of 4-hydroxy coumarin **4b** with substituted *p*-QMs **2b-n**.

## Metal-catalyzed annulations of triarylmethanes with alkyne:

### General procedure for the Synthesis of 2,6-di-*tert*-butyl-4-((5,6-diphenylindolo[2,1-*a*]isoquinolin-12-yl)(4-methoxyphenyl)methyl)phenol

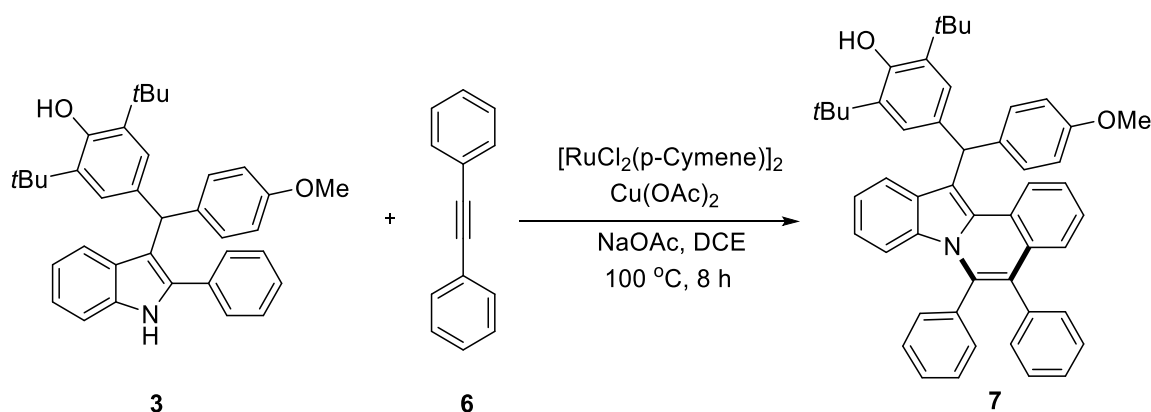

A screw-cap sealed tube (10 mL) containing 2,6-Di-*tert*-butyl-4-((4-methoxyphenyl)(2-phenyl-1*H*-indol-3-yl)methyl)phenol **3q** (30 mg, 0.057 mmol), diphenylacetylene **6** (0.069 mmol),  $[\text{RuCl}_2(\text{p-cymene})]_2$  (2.5 mol %),  $\text{Cu}(\text{OAc})_2$  (2.0 equiv) and  $\text{NaOAc}$  (1.0 equiv). Then, 1,2-DCE (1.5 mL), were added to the system via a syringe and the reaction mixture was allowed to stir at  $100\text{ }^\circ\text{C}$  for 8 h. When the reaction was completed (monitor by TLC), the mixture was cooled and diluted with  $\text{CH}_2\text{Cl}_2$  (10 mL). The mixture was filtered through a celite pad and the celite pad was washed with dichloromethane (3 x 20 mL). The combined filtrate was concentrated and the residue was purified by a silica gel column chromatography using hexane–EtOAc as eluent to give pure product **7**.

### General procedure for the Synthesis of 3-((3,5-di-*tert*-butyl-4-hydroxyphenyl)(4-methoxyphenyl)methyl)-5,6-diphenyl-2*H*-pyrano[2,3,4-*de*]chromen-2-one

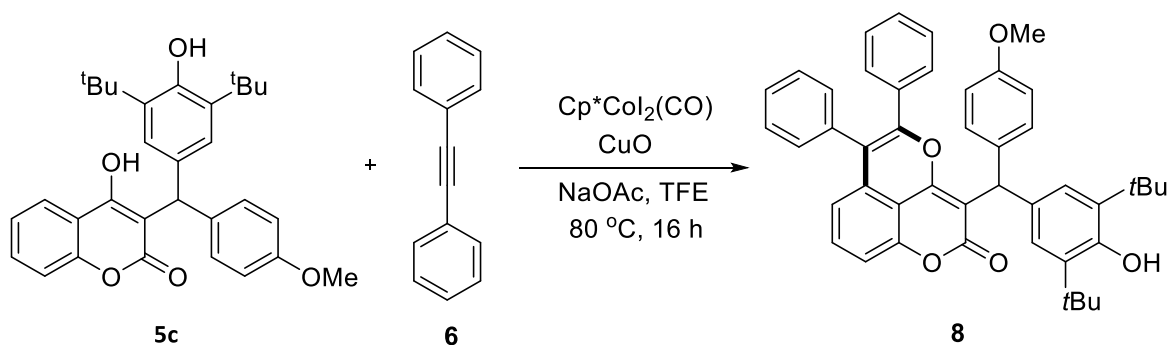

A screw-cap sealed tube (10 mL) containing 3-((3,5-di-*tert*-butyl-4-hydroxyphenyl)(4-methoxyphenyl)methyl)-4-hydroxy-2*H*-chromen-2-one **5c** (30 mg, 0.057 mmol), diphenylacetylene **6** (0.069 mmol), [Cp\*CoI<sub>2</sub>CO] (5mol %), CuO(2.0 eqiuv) and NaOAc (1.0 eqiuv). Then, 1,2-DCE (1.5 mL) were added to the system via a syringe and the reaction mixture was allowed to stir at 100 °C for 16 h. When the reaction was completed (monitor by TLC), the mixture was cooled and diluted with CH<sub>2</sub>Cl<sub>2</sub> (10 mL). The mixture was filtered through a celite pad and the celite pad was washed with dichloromethane (3 x 20 mL). The combined filtrate was concentrated and the residue was purified by a silica gel column chromatography using hexane–EtOAc as eluent to give pure product **8**.

## Spectroscopic Data:

### 4-((1*H*-indol-3-yl)(4-methoxyphenyl)methyl)-2,6-di-*tert*-butylphenol (**3a**)

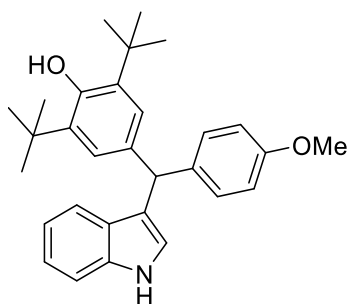

Red solid, Mp (232-234 °C), Yield: 84% (190 mg); <sup>1</sup>H NMR (300 MHz, CDCl<sub>3</sub>): δ 7.89 (s, 1H), 7.30 (d, *J* = 8.1 Hz, 1H), 7.22 (d, *J* = 7.2 Hz, 1H), 7.14 (d, *J* = 8.1 Hz, 3H), 7.03 (s, 2H), 6.96 (t, *J* = 7.5 Hz, 1H), 6.79 (d, *J* = 8.1 Hz, 2H), 5.50 (s, 1H), 5.04 (s, 1H), 3.76 (s, 3H), 1.35 (s, 18H) ppm. <sup>13</sup>C NMR (75 MHz, CDCl<sub>3</sub>): δ 157.7, 151.9, 136.8, 136.7, 135.3, 134.7, 129.8, 127.1, 125.4, 123.7, 121.8, 121.2, 120.1, 119.1, 113.4, 110.8, 55.2, 47.9, 34.3, 30.3 ppm. HRMS(*m/z*): [C<sub>30</sub>H<sub>35</sub>NO<sub>2</sub>+H]<sup>+</sup> Calcd 442.2746, Found 442.2767.

### 4-((1*H*-indol-3-yl)(*p*-tolyl)methyl)-2,6-di-*tert*-butylphenol (**3b**)

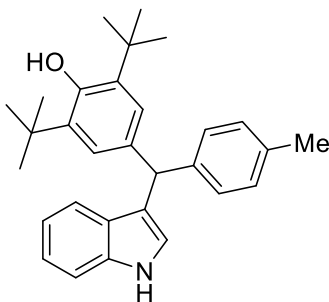

Brown solid, Mp (146-148 °C), Yield: 86% (188 mg); <sup>1</sup>H NMR (300 MHz, CDCl<sub>3</sub>): δ 7.88 (s, 1H), 7.31 (d, *J* = 8.1 Hz, 1H), 7.22 (d, *J* = 7.5 Hz, 1H), 7.15–7.11 (m, 3H), 7.06 (s, 2H), 7.04 (s, 2H), 6.95 (t, *J* = 7.8 Hz, 1H), 6.58 (d, *J* = 1.2 Hz, 1H), 5.51 (s, 1H), 5.03 (s, 1H), 2.30 (s, 1H), 1.35 (s, 18H) ppm. <sup>13</sup>C NMR (75 MHz, CDCl<sub>3</sub>): δ 151.9, 141.7, 136.7, 135.3, 135.2, 134.7, 128.8, 128.7, 127.2, 125.5, 123.7, 121.8, 121.0, 120.1, 119.1, 110.9, 48.4, 34.3, 30.4, 21.0 ppm. HRMS (*m/z*): [C<sub>30</sub>H<sub>35</sub>NO+H]<sup>+</sup>Calcd 426.2797, Found 426.2782.

#### 4-((1*H*-indol-3-yl)(phenyl)methyl)-2,6-di-*tert*-butylphenol (3c)

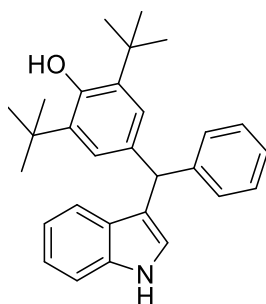

Brown solid, Mp (144-146 °C), Yield: 83% (175 mg); <sup>1</sup>H NMR (300 MHz, CDCl<sub>3</sub>): δ 7.89 (s, 1H), 7.31 (d, *J* = 8.1 Hz, 1H), 7.23 (s, 4H), 7.20 – 7.11 (m, 3H), 7.03 (s, 2H), 6.96 (t, *J* = 7.5 Hz, 1H), 5.55 (s, 1H), 5.04 (s, 1H), 1.35 (s, 18H) ppm. <sup>13</sup>C NMR (75 MHz, CDCl<sub>3</sub>): δ 152.0, 144.6, 136.7, 135.4, 134.5, 128.9, 128.1, 127.1, 125.9, 125.5, 123.8, 121.9, 120.8, 120.1, 119.2, 110.9, 48.8, 34.3, 30.4 ppm. HRMS (*m/z*): [C<sub>29</sub>H<sub>33</sub>NO+H]<sup>+</sup>Calcd 412.2640, Found 412.2615.

#### 2,6-Di-*tert*-butyl-4-((4-fluorophenyl)(1*H*-indol-3-yl)methyl)phenol (3d)

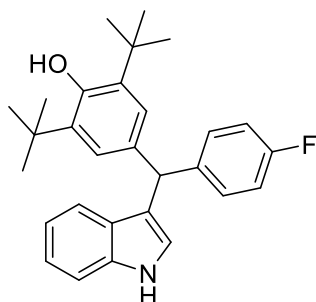

White solid, Mp (158-160 °C), Yield: 80% (176 mg); <sup>1</sup>H NMR (300 MHz, CDCl<sub>3</sub>): δ 7.76 (s, 1H), 7.22 (d, *J* = 8.1 Hz, 1H), 7.12–7.02 (m, 4H), 6.92–6.81 (m, 4H), 6.47 (s, 1H), 5.47 (s, 1H), 4.94 (s, 1H), 1.27 (s, 18H) ppm. <sup>13</sup>C NMR (75 MHz, CDCl<sub>3</sub>): δ 163.0, 159.7, 152.1, 140.49, 140.44, 136.9, 135.7, 134.4, 130.4, 130.3, 127.1, 125.4, 123.7, 122.0, 120.8, 120.0, 119.3, 114.9, 114.6, 110.9, 48.1, 34.3, 30.4 ppm. HRMS(*m/z*): [C<sub>29</sub>H<sub>32</sub>FNO+H]<sup>+</sup>Calcd 430.2546, Found 430.2539.

**2,6-Di-*tert*-butyl-4-((4-chlorophenyl)(1*H*-indol-3-yl)methyl)phenol (3e)**

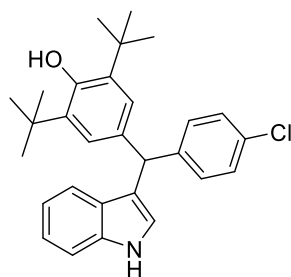

Yellow solid, Mp (160-162 °C), Yield: 82% (189 mg); <sup>1</sup>H NMR (300 MHz, CDCl<sub>3</sub>): δ 7.94 (s, 1H), 7.33 (d, *J* = 8.1 Hz, 1H), 7.24–7.12 (m, 6H), 7.00 (s, 2H), 6.96 (d, *J* = 7.5 Hz, 1H), 6.57 (s, 1H), 5.52 (s, 1H), 5.07 (s, 1H), 1.35 (s, 18H) ppm. <sup>13</sup>C NMR (75 MHz, CDCl<sub>3</sub>): δ 152.1, 143.2, 136.7, 135.5, 133.9, 131.6, 130.3, 128.2, 126.9, 125.4, 123.9, 122.0, 120.3, 119.9, 119.3, 111.0, 48.2, 34.3, 30.3 ppm. HRMS(*m/z*): [C<sub>29</sub>H<sub>32</sub>ClNO+H]<sup>+</sup> Calcd 446.2251, Found 446.2259.

**2,6-di-*tert*-butyl-4-((4-bromophenyl)(1*H*-indol-3-yl)methyl)phenol (3f)**

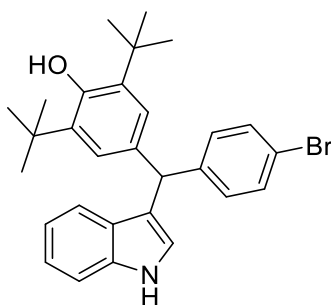

Brown solid, Mp (154-156 °C), Yield: 80% (201 mg); <sup>1</sup>H NMR (300 MHz, CDCl<sub>3</sub>): δ 7.93 (s, 1H), 7.38–7.31 (m, 3H), 7.17 (t, *J* = 7.9 Hz, 1H), 7.10 (d, *J* = 8.4 Hz, 2H), 7.00 (s, 2H), 6.96 (d, *J* = 7.5 Hz, 1H), 6.57 (s, 1H), 5.50 (s, 1H), 5.07 (s, 1H), 1.35 (s, 18H) ppm. <sup>13</sup>C NMR (75 MHz, CDCl<sub>3</sub>): δ 152.1, 143.7, 136.7, 135.6, 133.8, 131.2, 130.7, 126.9, 124.4, 123.9, 122.1, 120.2, 119.9, 119.7, 119.3, 111.0, 48.2, 34.3, 30.4 ppm. HRMS(*m/z*): [C<sub>29</sub>H<sub>32</sub>BrNO+H]<sup>+</sup> Calcd 490.1746, Found 490.1751.

**2,6-Di-*tert*-butyl-4-((3,4-dimethoxyphenyl)(1*H*-indol-3-yl)methyl)phenol (3g)**

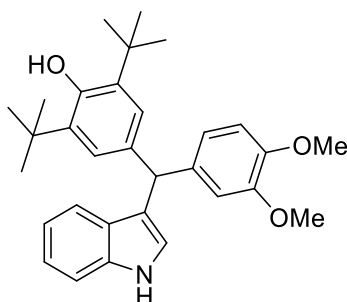



Brown solid, Mp (162-164 °C), Yield: 80% (194 mg);  $^1\text{H NMR}$  (300 MHz,  $\text{CDCl}_3$ ): $\delta$  7.95 (s, 1H), 7.32 (d,  $J = 8.1$  Hz, 1H), 7.23 (d,  $J = 4.8$  Hz, 1H), 7.13 (t,  $J = 7.8$  Hz, 1H), 7.05 (s, 2H), 6.97 (t,  $J = 8.1$  Hz, 1H), 6.81 (s, 1H), 6.75 (s, 2H), 6.58 (s, 1H), 5.50 (s, 1H), 5.05 (s, 1H), 3.84 (s, 3H), 3.75 (s, 3H), 1.36 (s, 18H) ppm.  $^{13}\text{C NMR}$  (75 MHz,  $\text{CDCl}_3$ ): $\delta$  152.0, 148.6, 147.1, 137.3, 136.7, 135.4, 134.5, 127.1, 125.4, 123.7, 121.9, 121.1, 120.9, 120.1, 119.1, 112.5, 110.9, 110.8, 55.84, 55.81, 48.4, 43.4, 34.3, 30.4 ppm. **HRMS**( $m/z$ ): $[\text{C}_{31}\text{H}_{37}\text{NO}_3+\text{H}]^+$ Calcd 472.2852, Found 472.2841.

#### 4-((1*H*-indol-3-yl)(3,4,5-trimethoxyphenyl)methyl)-2,6-di-*tert*-butylphenol (3h)

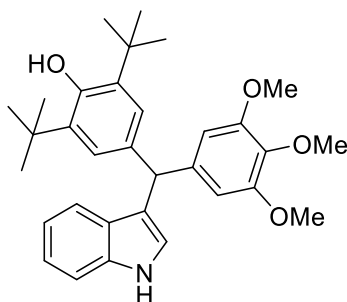

Brown solid, Mp (208-210 °C), Yield: 86% (221 mg);  $^1\text{H NMR}$  (300 MHz,  $\text{CDCl}_3$ ): $\delta$  7.99 (s, 1H), 7.33 (d,  $J = 8.1$  Hz, 1H), 7.27 (d,  $J = 8.1$  Hz, 1H), 7.14 (t,  $J = 7.8$  Hz, 1H), 7.08 (s, 2H), 6.61 (d,  $J = 1.5$  Hz, 1H), 6.49 (s, 2H), 5.47 (s, 1H), 5.07 (s, 1H), 3.82 (s, 3H), 3.72 (s, 6H), 1.37 (s, 18H) ppm.  $^{13}\text{C NMR}$  (75 MHz,  $\text{CDCl}_3$ ): $\delta$  152.2, 152.1, 140.4, 136.7, 136.2, 135.4, 134.1, 127.1, 125.3, 123.6, 121.9, 120.8, 120.0, 119.2, 110.9, 106.2, 60.8, 56.0, 49.1, 34.3, 30.4 ppm. **DEPT 135 NMR**(75 MHz,  $\text{CDCl}_3$ ): 125.3, 123.6, 121.9, 120.0, 119.2, 110.8, 106.7, 60.7, 56.1, 49.0, 30.4 ppm. **HRMS**( $m/z$ ): $[\text{C}_{32}\text{H}_{39}\text{NO}_4+\text{H}]^+$ Calcd 502.2957, Found 502.2968.

#### 4-(Benzo[*d*][1,3]dioxol-5-yl(1*H*-indol-3-yl)methyl)-2,6-di-*tert*-butylphenol (3i)

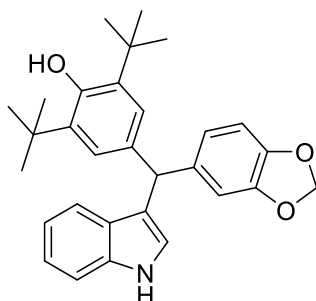

Yellow solid, Mp (108-110 °C), Yield: 85% (199 mg);  $^1\text{H NMR}$  (300 MHz,  $\text{CDCl}_3$ ): $\delta$  7.92 (s, 1H), 7.33 (d,  $J = 8.1$  Hz, 1H), 7.24 (t,  $J = 3.9$  Hz, 1H), 7.14 (t,  $J = 7.5$  Hz, 1H), 7.03 (s, 2H), 6.99 (t,  $J = 7.8$  Hz, 1H), 6.73 (d,  $J = 0.6$  Hz, 2H), 6.70 (s, 1H), 6.59 (d,  $J = 1.5$  Hz, 1H), 5.89 (d,  $J = 4.5$  Hz,

2H), 5.47 (s, 1H), 5.05 (s, 1H), 1.36 (s, 18H) ppm.  $^{13}\text{C}$  NMR (75 MHz,  $\text{CDCl}_3$ ):  $\delta$  152.0, 147.4, 145.6, 138.8, 136.7, 135.4, 134.5, 127.0, 125.3, 123.7, 121.9, 121.8, 120.8, 120.0, 119.2, 110.9, 109.5, 107.8, 100.7, 48.4, 34.3, 30.3 ppm. HRMS( $m/z$ ):  $[\text{C}_{30}\text{H}_{33}\text{NO}_3+\text{H}]^+$  Calcd 456.2539, Found 456.2527.

#### 4-((1*H*-Indol-3-yl)(1-(phenylsulfonyl)-1*H*-indol-3-yl)methyl)-2,6-di-*tert*-butylphenol (3j)

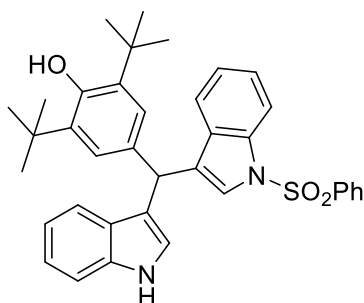

White solid, Mp (180-182 °C), Yield: 80% (242 mg); %.  $^1\text{H}$  NMR (300 MHz,  $\text{CDCl}_3$ ):  $\delta$  7.99 (d,  $J$  = 8.4 Hz, 1H), 7.95 (s, 1H) 7.73 (d,  $J$  = 8.1 Hz, 2H), 7.52 (t,  $J$  = 7.3 Hz, 1H), 7.41 – 7.35 (m, 3H), 7.27 – 7.14 (m, 4H), 7.11 – 7.02 (m, 4H), 6.96 (t,  $J$  = 7.3 Hz, 1H), 6.60 (d,  $J$  = 0.9 Hz, 1H), 5.62 (s, 1H), 5.07 (s, 1H), 1.33 (s, 18H) ppm.  $^{13}\text{C}$  NMR (75 MHz,  $\text{CDCl}_3$ ):  $\delta$  152.3, 138.1, 136.7, 135.8, 135.6, 133.5, 132.3, 130.8, 129.1, 127.6, 126.8, 126.6, 125.1, 125.0, 124.5, 123.4, 123.0, 122.0, 120.6, 119.6, 119.2, 118.8, 113.7, 111.1, 39.9, 34.3, 30.3 ppm. HRMS( $m/z$ ):  $[\text{C}_{37}\text{H}_{38}\text{N}_2\text{O}_3\text{S}+\text{H}]^+$  Calcd 591.2681, Found 591.2675.

#### 2,6-Di-*tert*-butyl-4-((9-ethyl-9*H*-carbazol-3-yl)(1*H*-indol-3-yl)methyl)phenol (3k)

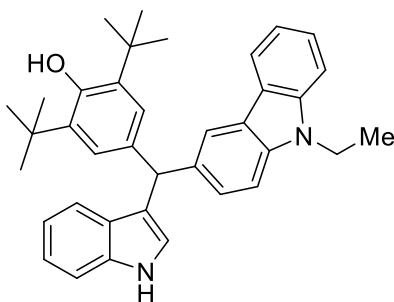

Orange solid, Mp (224-226 °C), Yield: 81% (220 mg);  $^1\text{H}$  NMR (300 MHz,  $\text{CDCl}_3$ ):  $\delta$  7.90 (d,  $J$  = 6.9 Hz, 2H), 7.80 (s, 1H), 7.35 – 7.16 (m, 5H), 7.09 – 7.01 (m, 4H), 6.80 (t,  $J$  = 7.35, 1H), 6.55 (s, 1H), 5.68 (s, 1H), 4.98 (s, 1H), 4.25 (q,  $J$  = 7.2 Hz, 2H) 1.34 (t,  $J$  = 7.2 Hz, 3H), 1.28 (s, 18H) ppm.  $^{13}\text{C}$  NMR (75 MHz,  $\text{CDCl}_3$ ):  $\delta$  151.9, 140.3, 138.8, 136.9, 135.5, 135.3, 127.4, 127.1, 125.6, 125.2, 123.8, 123.2, 122.9, 121.8, 121.8, 120.5, 120.4, 120.3, 119.1, 118.4, 110.8, 108.3, 108.0, 48.9, 37.5, 34.3, 30.4, 13.7 ppm. HRMS( $m/z$ ):  $[\text{C}_{37}\text{H}_{40}\text{N}_2\text{O}+\text{H}]^+$  Calcd 529.3219, Found 529.3225.

#### 4-((1*H*-indol-3-yl)(naphthalen-1-yl)methyl)-2,6-di-*tert*-butylphenol (3l)

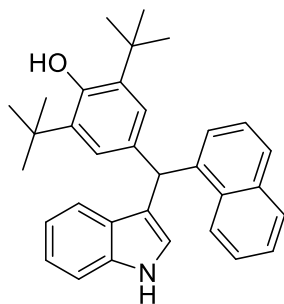

Red solid, Mp (209-210 °C), Yield: 86% (204 mg); <sup>1</sup>H NMR (300 MHz, CDCl<sub>3</sub>): δ 8.17 (d, *J* = 7.5 Hz, 1H), 7.84 (d, *J* = 6.3 Hz, 2H), 7.70 (d, *J* = 8.1 Hz, 1H), 7.45–7.40 (m, 2H), 7.31 (d, *J* = 7.5 Hz, 2H), 7.22 (d, *J* = 7.8 Hz, 1H), 7.16–7.12 (m, 2H), 7.05 (s, 2H), 6.95 (t, *J* = 7.5 Hz, 1H), 6.46 (s, 1H), 6.32 (s, 1H), 5.03 (s, 1H), 1.32 (s, 18H) ppm. <sup>13</sup>C NMR (75 MHz, CDCl<sub>3</sub>): δ 152.0, 140.5, 136.7, 135.4, 133.9, 133.7, 132.0, 128.6, 127.1, 126.8, 126.6, 125.8, 125.4, 125.2, 124.5, 124.4, 121.9, 120.8, 119.9, 119.2, 110.9, 44.5, 34.3, 30.4 ppm. HRMS(*m/z*): [C<sub>33</sub>H<sub>35</sub>NO+H]<sup>+</sup> Calcd 462.2797, Found 462.2801.

#### 4-((1*H*-indol-3-yl)(pyren-1-yl)methyl)-2,6-di-*tert*-butylphenol (3m)

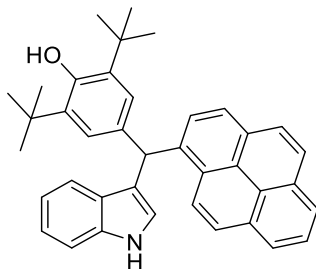

Yellow solid, Mp (255-257 °C), Yield: 83% (228 mg); <sup>1</sup>H NMR (300 MHz, CDCl<sub>3</sub>): δ 8.38 (d, *J* = 9.3 Hz, 1H), 8.05 (t, *J* = 6.1 Hz, 2H), 7.95 – 7.90 (m, 4H), 7.86 (d, *J* = 7.5 Hz, 1H), 7.78 (s, 1H), 7.66 (d, *J* = 8.1 Hz, 1H), 7.25 (d, *J* = 8.1 Hz, 1H), 7.15 (s, 1H), 7.09 – 7.02 (m, 4H), 6.80 (t, *J* = 7.6 Hz, 1H), 6.56 (s, 1H), 6.42 (s, 1H), 4.94 (s, 1H) ppm. <sup>13</sup>C NMR (75 MHz, CDCl<sub>3</sub>): δ 152.1, 138.7, 136.9, 135.7, 134.1, 131.5, 130.9, 129.9, 128.9, 127.6, 127.3, 127.2, 127.1, 126.7, 125.9, 125.7, 125.2, 125.1, 124.8, 124.7, 124.7, 124.6, 123.9, 122.0, 121.2, 120.1, 119.3, 110.9, 45.0, 34.3, 30.4 ppm. HRMS(*m/z*): [C<sub>39</sub>H<sub>37</sub>NO+H]<sup>+</sup> Calcd 536.2953, Found 536.2946.

#### 2,6-Di-*tert*-butyl-4-((5-methoxy-1*H*-indol-3-yl)(4-methoxyphenyl)methyl)phenol (3n)

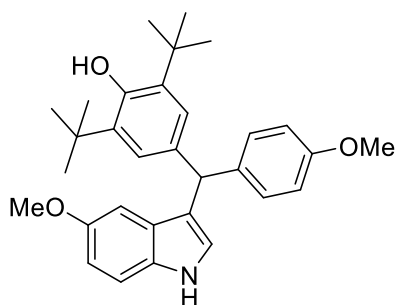

Pale yellow solid, Mp (143-144 °C), Yield: 86% (166mg);  $^1\text{H NMR}$  (300 MHz,  $\text{CDCl}_3$ ):  $\delta$  7.81 (s, 1H), 7.18 – 7.14 (m, 3H), 7.04 (s, 2H), 6.82 (s, 1H), 6.81 – 6.76 (m, 2H), 6.60 – 6.55 (m, 2H), 3.76 (s, 1H), 3.64 (s, 1H), 1.35 (s, 18H) ppm.  $^{13}\text{C NMR}$  (75 MHz,  $\text{CDCl}_3$ ):  $\delta$  157.7, 153.6, 151.9, 136.8, 135.4, 134.7, 131.9, 129.8, 127.5, 125.4, 124.4, 120.9, 113.5, 111.9, 111.5, 102.1, 55.7, 55.2, 48.1, 34.3, 30.4 ppm. **HRMS** ( $m/z$ ):  $[\text{C}_{31}\text{H}_{37}\text{NO}_3+\text{H}]^+$  Calcd 472.2852, Found 472.2857.

**2,6-Di-tert-butyl-4-((4-methoxyphenyl)(5-nitro-1H-indol-3-yl)methyl)phenol (3o)**

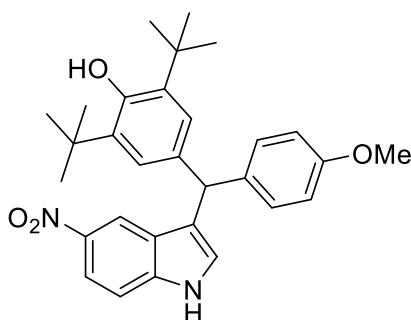

Yellow solid, Mp (130-132 °C), Yield: 84% (152 mg);  $^1\text{H NMR}$  (300 MHz,  $\text{CDCl}_3$ ):  $\delta$  8.35 (s, 1H), 8.18 (d,  $J = 1.8$  Hz, 1H), 8.06 (dd,  $J_1 = 9.0$  Hz,  $J_2 = 9.0$  Hz, 1H), 7.36 (d,  $J = 9.0$  Hz, 1H), 7.13 (d,  $J = 8.7$  Hz, 1H), 7.01 (s, 2H), 6.82 (d,  $J = 8.4$  Hz, 2H), 6.78 (s, 1H), 5.54 (s, 1H), 5.09 (s, 1H), 3.79 (s, 3H), 1.35 (s, 18H) ppm.  $^{13}\text{C NMR}$  (75 MHz,  $\text{CDCl}_3$ ):  $\delta$  158.0, 152.2, 141.5, 139.6, 135.9, 135.7, 133.8, 129.6, 126.56, 126.52, 125.3, 123.8, 117.7, 117.4, 113.7, 110.9, 55.2, 47.6, 34.3, 30.3 ppm. **HRMS** ( $m/z$ ):  $[\text{C}_{30}\text{H}_{34}\text{N}_2\text{O}_4+\text{H}]^+$  Calcd 487.2597, Found 487.2583.

**2,6-di-tert-butyl-4-((5-chloro-1H-indol-3-yl)(4-methoxyphenyl)methyl)phenol (3p)**

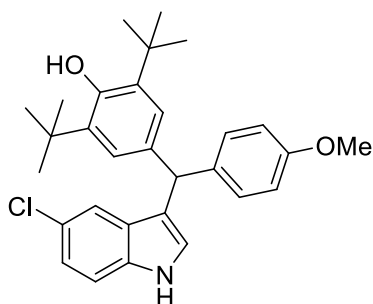

Pale yellow solid, Mp (166-168 °C), Yield: 85% (161 mg); <sup>1</sup>H NMR (300 MHz, CDCl<sub>3</sub>): δ 7.93 (s, m, 1H), 7.26 – 7.10 (m, 5H), 7.04 (s, 2H), 6.84 (d, *J* = 7.8 Hz, 2H), 6.65 (s, 1H), 5.48 (s, 1H), 5.06 (s, 1H), 3.81 (s, 3H), 1.40 (s, 18H) ppm. <sup>13</sup>C NMR (75 MHz, CDCl<sub>3</sub>): δ 158.0, 152.1, 136.6, 135.7, 135.2, 134.4, 129.7, 128.3, 125.4, 125.0, 122.2, 121.1, 119.6, 113.7, 111.9, 55.2, 47.9, 34.3, 30.4 ppm. HRMS(*m/z*):[C<sub>30</sub>H<sub>34</sub>ClNO<sub>2</sub>+Na]<sup>+</sup>Calcd 498.2176, Found 498.2169.

**4-((5-bromo-1*H*-indol-3-yl)(4-methoxyphenyl)methyl)-2,6-di-*tert*-butylphenol (3q)**

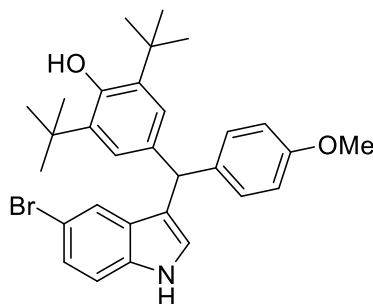

Yellow solid, Mp (174-176 °C), Yield: 83% (132 mg); <sup>1</sup>H NMR (300 MHz, CDCl<sub>3</sub>):δ 7.93 (s, 1H), 7.37 (s, 1H), 7.27-7.14 (m, 4H), 7.04 (s, 2H), 6.85 (d, *J* = 8.7 Hz, 2H), 6.63 (s, 1H), 5.48 (s, 1H), 5.07 (s, 1H), 3.81 (s, 3H), 1.40 (s, 18H) ppm. <sup>13</sup>C NMR (75 MHz, CDCl<sub>3</sub>): δ 158.0, 152.1, 136.6, 135.7, 135.4, 134.4, 129.7, 129.0, 125.4, 124.87, 124.82, 122.7, 121.0, 113.7, 112.5, 112.3, 55.2, 47.8, 34.3, 30.4 ppm. HRMS(*m/z*):[C<sub>30</sub>H<sub>34</sub>BrNO<sub>2</sub>+H]<sup>+</sup>Calcd 519.1773, Found 519.1781.

**2,6-Di-*tert*-butyl-4-((4-methoxyphenyl)(2-methyl-1*H*-indol-3-yl)methyl)phenol (3r)**

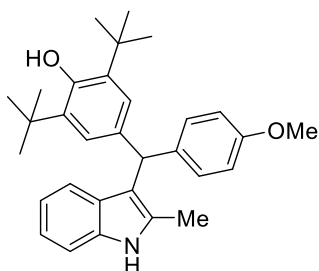

Red solid, Mp (162-164 °C), Yield: 90% (188 mg); <sup>1</sup>H NMR (300 MHz, CDCl<sub>3</sub>):δ 7.72 (s, 1H), 7.24 (d, *J* = 10.5 Hz, 1H), 7.10 – 7.01 (m, 6H), 6.89 (t, *J* = 7.5 Hz, 1H), 6.77 (d, *J* = 7.8 Hz, 2H), 5.58 (s, 1H), 5.04 (s, 1H), 3.76 (s, 3H), 2.15 (s, 3H), 1.33 (s, 18H) ppm. <sup>13</sup>C NMR (75 MHz, CDCl<sub>3</sub>):δ 157.5, 151.8, 137.0, 135.3, 135.2, 134.4, 131.5, 129.9, 128.5, 125.8, 120.5, 119.7, 118.9, 115.1, 113.3, 109.9, 55.2, 46.7, 34.3, 30.3, 12.5 ppm. HRMS (*m/z*):[C<sub>31</sub>H<sub>37</sub>NO<sub>2</sub>+H]<sup>+</sup>Calcd 456.2903, Found 456.2911.

**2,6-Di-*tert*-butyl-4-((4-methoxyphenyl)(2-phenyl-1*H*-indol-3-yl)methyl)phenol (3s)**

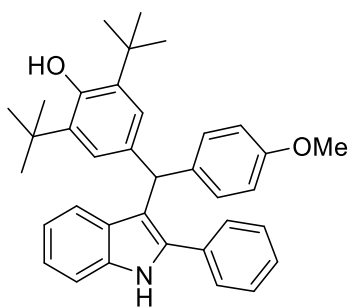

Brown solid, Mp (177-178 °C), Yield: 79% (128 mg);  $^1\text{H NMR}$  (300 MHz,  $\text{CDCl}_3$ ): $\delta$  8.05 (s, 1H), 7.49 – 7.32 (m, 6H), 7.15 – 7.09 (m, 4H), 7.05 (s, 2H), 6.90 (t,  $J = 6.9$  Hz, 1H), 6.75 (d,  $J = 8.7$  Hz, 1H), 5.66 (s, 1H), 5.01 (s, 1H), 3.76 (s, 3H), 1.30 (s, 18H) ppm.  $^{13}\text{C NMR}$  (300 MHz,  $\text{CDCl}_3$ ): $\delta$  157.5, 151.8, 137.1, 136.2, 135.36, 135.33, 134.6, 133.3, 129.9, 128.8, 128.5, 128.3, 127.7, 125.9, 121.8, 121.7, 119.3, 116.4, 113.3, 110.6, 55.2, 46.8, 34.3, 30.3 ppm. DEPT 135 NMR (75 MHz,  $\text{CDCl}_3$ ): 130.0, 128.8, 128.5, 127.7, 125.9, 121.85, 121.82, 119.3, 113.4, 110.6, 55.2, 47.0, 30.4 ppm. HRMS ( $m/z$ ):  $[\text{C}_{36}\text{H}_{39}\text{NO}_2+\text{H}]^+$  Calcd 518.3059, Found 518.3051.

**2,6-Di-tert-butyl-4-((4-methoxyphenyl)(3-methyl-1H-indol-2-yl)methyl)phenol (3u)**

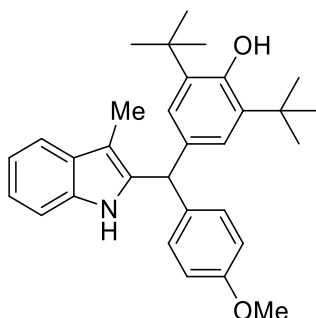

Red solid, Mp (158-160 °C), Yield: 68% (142 mg);  $^1\text{H NMR}$  (300 MHz,  $\text{CDCl}_3$ ): $\delta$  7.53 – 7.47 (m, 4H), 7.23 – 7.20 (m, 1H), 7.10 – 7.06 (m, 4H), 7.04 (d,  $J = 8.7$  Hz, 2H), 2.13 (s, 1H), 1.36 (s, 18H) ppm.  $^{13}\text{C NMR}$  (75 MHz,  $\text{CDCl}_3$ ): $\delta$  158.1, 152.5, 136.5, 135.9, 135.0, 134.9, 132.6, 129.8, 129.7, 125.5, 121.0, 119.0, 118.2, 113.7, 110.5, 107.7, 55.2, 47.8, 34.3, 30.3, 8.7 ppm. HRMS( $m/z$ ): $[\text{C}_{31}\text{H}_{37}\text{NO}_2+\text{H}]^+$  Calcd 456.2903, Found 456.2911.

**2,6-Di-tert-butyl-4-((4-methoxyphenyl)(1-methyl-1H-indol-3-yl)methyl)phenol (3v)**

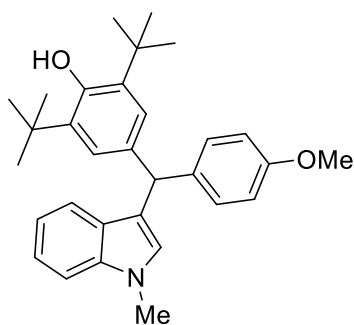

Yellow solid, Mp (88-90°C), Yield: 52% (109 mg);  $^1\text{H NMR}$  (300 MHz,  $\text{CDCl}_3$ ):  $\delta$  7.36 – 7.21 (m, 5H), 7.12 (s, 2H), 7.02 (t,  $J = 7.3$  Hz, 1H), 6.87 (d,  $J = 8.4$  Hz, 2H), 6.51 (s, 1H), 5.57 (s, 1H), 5.07 (s, 1H), 3.83 (s, 3H), 3.75 (s, 3H), 1.44 (s, 18H) ppm.  $^{13}\text{C NMR}$  (75 MHz,  $\text{CDCl}_3$ ):  $\delta$  157.9, 151.9, 137.6, 137.3, 135.5, 135.0, 129.8, 128.3, 127.7, 125.5, 121.4, 120.3, 119.6, 118.6, 113.5, 108.9, 55.2, 48.1, 34.3, 32.5, 30.4 ppm. HRMS( $m/z$ ):  $[\text{C}_{31}\text{H}_{37}\text{NO}_2 + \text{H}]^+$  Calcd 456.2903, Found 456.2907.

#### 4-((1H-benzo[d]imidazol-2-yl)(4-methoxyphenyl)methyl)-2,6-di-tert-butylphenol (3w)

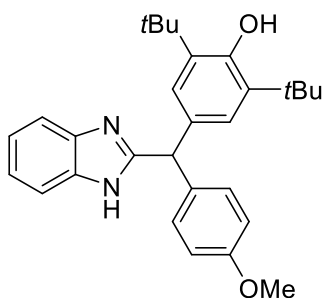

White solid, Mp (155-157 °C), Yield: 81% (182 mg);  $^1\text{H NMR}$  (300 MHz,  $\text{CDCl}_3$ ):  $\delta$  7.83 (d,  $J = 7.5$  Hz, 1H), 7.64 (s, 1H), 7.28 – 7.18 (m, 3H), 7.05 (d,  $J = 8.7$  Hz, 2H), 6.99 (s, 2H), 6.89 (d,  $J = 8.4$  Hz, 2H), 6.64 (s, 1H), 5.31 (s, 1H), 3.82 (s, 3H), 1.38 (s, 18H) ppm.  $^{13}\text{C NMR}$  (75 MHz,  $\text{CDCl}_3$ ):  $\delta$  159.4, 153.8, 136.7, 131.1, 128.8, 125.2, 122.2, 122.0, 114.2, 111.1, 63.7, 55.2, 34.4, 30.2 ppm. HRMS( $m/z$ ):  $[\text{C}_{29}\text{H}_{34}\text{N}_2\text{O}_2 + \text{H}]^+$  Calcd 443.2699, Found 443.2700.

#### 2,6-di-tert-butyl-4-((4-methoxyphenyl)(1H-pyrazol-4-yl)methyl)phenol (3x)

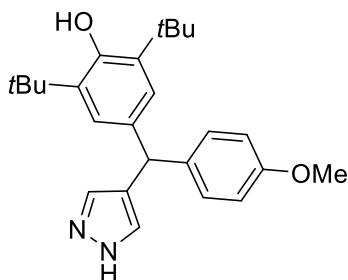

Pale yellow solid, Mp (110-112 °C), Yield: 78% (270 mg);  $^1\text{H NMR}$  (300 MHz,  $\text{CDCl}_3$ ):  $\delta$  7.60 (s, 1H), 7.26 (s, 1H), 7.05 (d,  $J = 8.4$  Hz, 2H), 6.89 – 6.86 (m, 4H), 6.66 (s, 1H), 6.27 (s, 1H), 5.19

(s, 1H), 3.81 (s, 3H), 1.38 (s, 18H) ppm.  $^{13}\text{C}$  NMR (75 MHz,  $\text{CDCl}_3$ ):  $\delta$  159.2, 153.4, 136.0, 132.6, 130.4, 129.4, 124.8, 113.9, 105.1, 69.3, 55.2, 34.3, 30.2 ppm. HRMS( $m/z$ ): $[\text{C}_{25}\text{H}_{32}\text{N}_2\text{O}_2+\text{H}]^+$ Calcd 393.2542, Found 393.2537.

**3-((3,5-Di-*tert*-butyl-4-hydroxyphenyl)(4-methoxyphenyl)methyl)-4-hydroxy-2H-chromen-2-one (5a)**

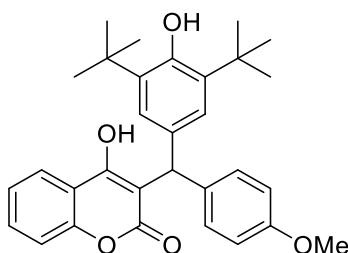

White solid, Mp (185-187 °C), Yield: 94% (170 mg);  $^1\text{H}$  NMR (300 MHz,  $\text{CDCl}_3$ ):  $\delta$  7.64 (d,  $J$  = 7.8 Hz, 1H), 7.55 – 7.49 (m, 1H), 7.31 (d,  $J$  = 8.1 Hz, 1H), 7.25 (t,  $J$  = 7.6 Hz, 1H), 7.1 (d,  $J$  = 8.4 Hz, 2H), 7.04 (s, 2H), 6.89 (d,  $J$  = 8.7 Hz, 1H), 6.51 (s, 1H), 5.78 (s, 1H), 5.25 (s, 1H), 3.80 (s, 3H), 1.36 (s, 18H) ppm.  $^{13}\text{C}$  NMR (75 MHz,  $\text{CDCl}_3$ ):  $\delta$  163.3, 160.5, 158.8, 153.3, 152.7, 137.1, 132.3, 131.8, 130.5, 129.7, 125.3, 123.8, 123.0, 116.4, 116.1, 114.4, 108.3, 55.3, 46.5, 34.4, 30.1 ppm. DEPT 135 NMR (75 MHz,  $\text{CDCl}_3$ ): 131.8, 129.7, 125.3, 123.8, 123.1, 116.4, 114.4, 55.2, 46.5, 30.2 ppm. HRMS ( $m/z$ ): $[\text{C}_{31}\text{H}_{34}\text{O}_5+\text{H}]^+$ Calcd 487.2484, Found 487.2491.

**3-((3,5-Di-*tert*-butyl-4-hydroxyphenyl)(*p*-tolyl)methyl)-4-hydroxy-2H-chromen-2-one (5b)**

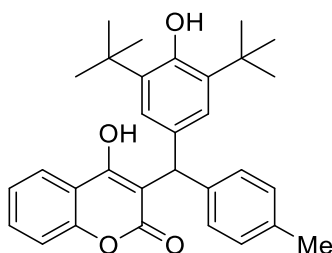

White solid, Mp (198-200°C), Yield: 91% (159 mg);  $^1\text{H}$  NMR (300 MHz,  $\text{CDCl}_3$ ):  $\delta$  7.75 (d,  $J$  = 7.8 Hz, 1H), 7.54 (t,  $J$  = 7.6 Hz, 1H), 7.32 (d,  $J$  = 8.4 Hz, 1H), 7.29 – 7.24 (m, 4H), 7.18 (s, 2H), 7.08 (s, 2H), 6.49 (s, 1H), 5.83 (s, 1H), 5.24 (s, 1H), 2.36 (s, 3H), 1.39 (s, 3H) ppm.  $^{13}\text{C}$  NMR (75 MHz,  $\text{CDCl}_3$ ):  $\delta$  160.5, 153.3, 152.8, 137.6, 137.2, 137.0, 131.7, 130.5, 129.8, 128.6, 125.4, 123.7, 123.1, 116.4, 116.2, 108.4, 47.1, 34.5, 30.2, 21.0 ppm. HRMS ( $m/z$ ): $[\text{C}_{31}\text{H}_{34}\text{O}_4+\text{H}]^+$ Calcd 471.2535, Found 471.2547.

**3-((3,5-Di-*tert*-butyl-4-hydroxyphenyl)(phenyl)methyl)-4-hydroxy-2H-chromen-2-one (5c)**



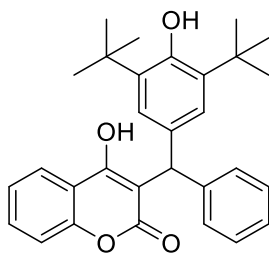

White solid, Mp (190-192 °C), Yield: 92% (156 mg);  $^1\text{H NMR}$  (300 MHz,  $\text{CDCl}_3$ ):  $\delta$  7.76 ( $J_1 = 7.8$  Hz,  $J_2 = 8.1$  Hz, 1H), 7.57 – 7.52 (m, 1H), 7.40 – 7.28 (m, 7H), 7.06 (s, 2H), 6.49 (s, 1H), 5.87 (s, 1H), 5.26 (s, 1H), 1.38 (s, 18H) ppm.  $^{13}\text{C NMR}$  (75 MHz,  $\text{CDCl}_3$ ):  $\delta$  163.4, 160.8, 153.4, 152.8, 140.6, 137.4, 130.4, 129.0, 128.7, 127.3, 125.4, 123.8, 123.1, 116.4, 116.2, 108.1, 47.5, 34.5, 30.2 ppm. HRMS ( $m/z$ ):  $[\text{C}_{30}\text{H}_{32}\text{O}_4 + \text{H}]^+$  Calcd 457.2379, Found 457.2368.

**3-((3,5-Di-tert-butyl-4-hydroxyphenyl)(4-fluorophenyl)methyl)-4-hydroxy-2H-chromen-2-one (5d)**

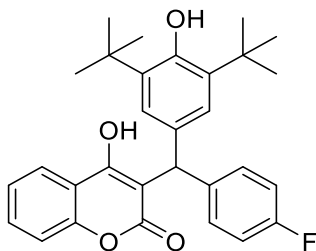

Yellow solid, Mp (222-224°C), Yield: 92% (162 mg);  $^1\text{H NMR}$  (300 MHz,  $\text{CDCl}_3$ ):  $\delta$  7.77 (d,  $J = 8.1$  Hz, 1H), 7.56 (t,  $J = 7.6$  Hz, 1H), 7.35 – 7.25 (m, 4H), 7.09 – 7.03 (m, 4H), 6.51 (s, 1H), 5.85 (s, 1H), 5.31 (s, 1H), 1.39 (s, 18H) ppm.  $^{13}\text{C NMR}$  (75 MHz,  $\text{CDCl}_3$ ):  $\delta$  163.6, 163.1, 160.7, 153.6, 152.8, 137.6, 136.1, 131.9, 130.4, 125.3, 123.8, 123.1, 116.4, 116.1, 115.9, 107.8, 46.8, 34.5, 30.1 ppm. HRMS ( $m/z$ ):  $[\text{C}_{30}\text{H}_{31}\text{FO}_4 + \text{H}]^+$  Calcd 475.2285, Found 475.2286.

**3-((4-Chlorophenyl)(3,5-di-tert-butyl-4-hydroxyphenyl)methyl)-4-hydroxy-2H-chromen-2-one (5e)**

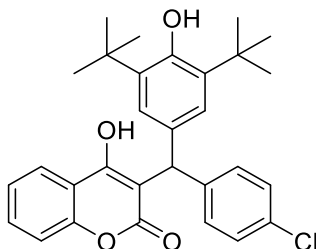

Yellow solid, Mp (200-202 °C), Yield: 90% (164 mg);  $^1\text{H NMR}$  (300 MHz,  $\text{CDCl}_3$ ):  $\delta$  7.78 (d,  $J = 9.0$  Hz, 1H), 7.57 (d,  $J = 7.8$  Hz, 1H), 7.36 – 7.24 (m, 6H), 7.05 (2H), 6.51 (s, 1H), 5.83 (s, 1H), 5.31 (s, 1H), 1.39 (s, 3H) ppm.  $^{13}\text{C NMR}$  (75 MHz,  $\text{CDCl}_3$ ):  $\delta$  163.0, 160.7, 153.7, 152.8, 139.1,

137.7, 133.1, 132.0, 130.1, 130.0, 129.0, 125.3, 123.8, 123.1, 116.4, 116.1, 107.6, 47.0, 34.5, 30.2 ppm. **HRMS(*m/z*):**[C<sub>30</sub>H<sub>31</sub>ClO<sub>4</sub>+H]<sup>+</sup>Calcd 491.1989, Found 491.1982.

**3-((4-Bromophenyl)(3,5-di-*tert*-butyl-4-hydroxyphenyl)methyl)-4-hydroxy-2H-chromen-2-one (5f)**

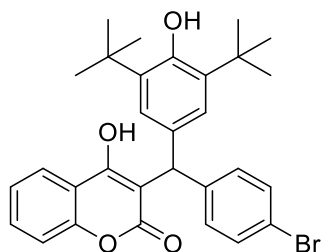

Yellow solid, Mp (178-180 °C), Yield: 95% (188 mg); <sup>1</sup>H NMR (300 MHz, CDCl<sub>3</sub>): δ 7.76 (dd, *J*<sub>1</sub> = 7.8 Hz, *J*<sub>2</sub> = 8.1 Hz, 1H), 7.58 – 7.48 (m, 3H), 7.35 – 7.18 (m, 4H), 7.05 (s, 1H), 6.49 (s, 1H), 5.81 (s, 1H), 5.31 (s, 1H), 1.39 (s, 18H) ppm. <sup>13</sup>C NMR (75 MHz, CDCl<sub>3</sub>): δ 163.0, 160.8, 153.6, 152.7, 139.5, 137.7, 131.9, 130.4, 129.9, 125.3, 123.8, 123.1, 121.1, 116.4, 116.0, 107.4, 47.0, 34.5, 30.1 ppm. **HRMS(*m/z*):**[C<sub>30</sub>H<sub>31</sub>BrO<sub>4</sub>+H]<sup>+</sup>Calcd 535.1484, Found 535.1487.

**3-(((3,5-Di-*tert*-butyl-4-hydroxyphenyl)(3,4,5-trimethoxyphenyl)methyl)-4-hydroxy-2H-chromen-2-one (5g)**

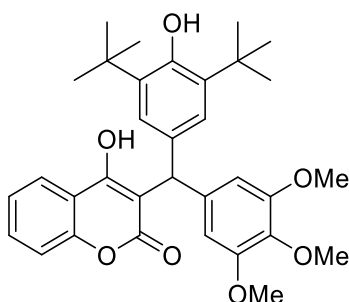

Yellow solid, Mp (163-165 °C), Yield: 96% (194 mg); <sup>1</sup>H NMR (300 MHz, CDCl<sub>3</sub>): δ 7.67 (dd, *J*<sub>1</sub> = 7.8 Hz, *J*<sub>2</sub> = 7.8 Hz, 1H), 7.42 – 7.42 (m, 1H), 7.26 – 7.15 (m, 3H), 7.00 (s, 2H), 6.46 (s, 1H), 6.41 (s, 2H), 5.69 (s, 1H), 5.15 (s, 1H), 3.76 (s, 3H), 3.67 (s, 6H), 1.30 (s, 18H) ppm. <sup>13</sup>C NMR (75 MHz, CDCl<sub>3</sub>): δ 163.3, 160.6, 153.9, 153.4, 152.8, 137.9, 137.2, 136.4, 131.9, 130.1, 125.3, 123.8, 123.1, 116.1, 108.2, 106.4, 60.8, 56.3, 47.5, 34.5, 30.2 ppm. **HRMS (*m/z*):**[C<sub>33</sub>H<sub>38</sub>O<sub>7</sub>+H]<sup>+</sup>Calcd 547.2696, Found 547.2701.

**3-(Benzo[*d*][1,3]dioxol-5-yl(3,5-di-*tert*-butyl-4-hydroxyphenyl)methyl)-4-hydroxy-2H-chromen-2-one (5h)**

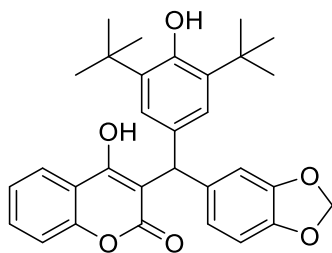

Yellow solid, Mp (148-150 °C), Yield: 90% (167 mg);  $^1\text{H NMR}$  (300 MHz,  $\text{CDCl}_3$ ):  $\delta$  7.65 (d,  $J$  = 7.8 Hz, 1H), 7.43 (t,  $J$  = 7.8 Hz, 1H), 7.24 – 7.13 (m, 2H), 6.98 (s, 2H), 6.71 – 6.62 (m, 3H), 6.46 (m, 1H), 5.86 (s, 1H), 5.67 (s, 1H), 5.16 (s, 1H), 1.29 (s, 18H) ppm.  $^{13}\text{C NMR}$  (75 MHz,  $\text{CDCl}_3$ ):  $\delta$  163.2, 160.6, 153.4, 152.8, 148.4, 146.9, 137.3, 134.6, 131.8, 130.4, 125.3, 123.8, 123.1, 121.6, 116.4, 116.1, 109.3, 108.5, 101.1, 47.1, 34.5, 30.2 ppm. **HRMS( $m/z$ ):**  $[\text{C}_{31}\text{H}_{32}\text{O}_6+\text{H}]^+$  Calcd 501.2277, Found 501.2269.

**3-((3,5-Di-*tert*-butyl-4-hydroxyphenyl)(9-ethyl-9H-carbazol-3-yl)methyl)-4-hydroxy-2H-chromen-2-one (5i)**

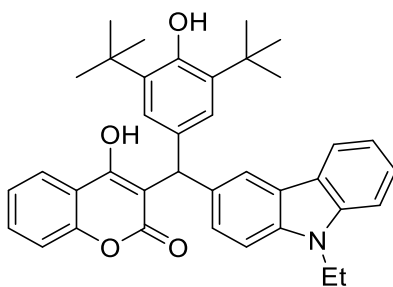

Red solid, Mp (168-170 °C), Yield: 85% (180 mg);  $^1\text{H NMR}$  (300 MHz,  $\text{CDCl}_3$ ):  $\delta$  8.04 – 7.99 (m, 2H), 7.77 (d,  $J$  = 8.1 Hz, 1H), 7.57 – 7.42 (m, 5H), 7.35 (s, 2H), 7.30 – 7.18 (m, 3H), 6.09 (s, 1H), 5.26 (s, 1H), 1.41 (s, 18H), 1.37 (t,  $J$  = 2.5 Hz, 3H) ppm.  $^{13}\text{C NMR}$  (75 MHz,  $\text{CDCl}_3$ ):  $\delta$  163.3, 160.5, 153.2, 152.8, 140.5, 139.3, 137.1, 131.6, 131.05, 131.01, 126.4, 125.9, 125.5, 123.7, 123.6, 123.1, 122.8, 120.5, 120.4, 118.9, 116.3, 109.1, 108.5, 47.4, 37.6, 34.5, 30.3, 13.7 ppm. **HRMS( $m/z$ ):**  $[\text{C}_{38}\text{H}_{39}\text{NO}_7+\text{H}]^+$  Calcd 574.2957, Found 574.2961.

**3-((3,5-Di-*tert*-butyl-4-hydroxyphenyl)(8,10-dihydropyren-1-yl)methyl)-4-hydroxy-2H-chromen-2-one (5j)**

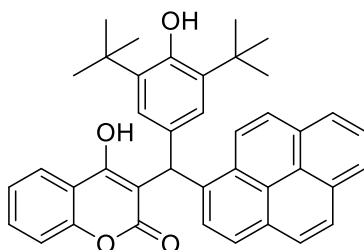

White solid, Mp (160-162 °C), Yield: 88% (190 mg);  $^1\text{H NMR}$  (300 MHz,  $\text{CDCl}_3$ ):  $\delta$  8.30 (d,  $J = 9.3$  Hz, 1H), 8.22 – 8.02 (m, 6H), 7.80 (d,  $J = 7.8$  Hz), 7.70 (d,  $J = 7.8$  Hz, 1H), 7.70 (d,  $J = 7.8$  Hz, 1H), 7.55 (t,  $J = 7.8$  Hz, 1H), 7.37 (d,  $J = 8.1$  Hz, 1H), 7.28 (s, 2H), 7.23 (d,  $J = 7.8$  Hz, 2H), 7.15 (s, 1H), 6.87 (s, 1H), 5.26 (s, 1H), 1.35 (s, 18H) ppm.  $^{13}\text{C NMR}$  (75 MHz,  $\text{CDCl}_3$ ):  $\delta$  163.4, 161.6, 153.5, 137.4, 134.6, 131.9, 130.2, 129.8, 128.4, 127.3, 126.2, 125.4, 123.9, 123.3, 123.1, 116.5, 116.1, 108.1, 44.9, 34.5, 30.2 ppm. **HRMS**( $m/z$ ):  $[\text{C}_{40}\text{H}_{36}\text{O}_4+\text{H}]^+$  Calcd 581.2692, Found 581.2698.

**3-((3,5-Di-*tert*-butyl-4-hydroxyphenyl)(4-methoxyphenyl)methyl)-4-hydroxy-1-methylquinolin-2(1*H*)-one (5k)**

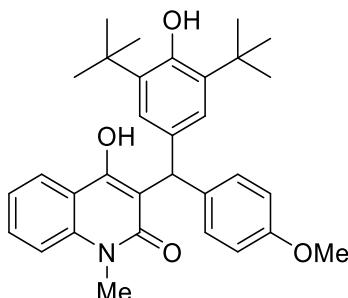

White solid, Mp (202-204 °C), Yield: 86% (148 mg);  $^1\text{H NMR}$  (300 MHz,  $\text{CDCl}_3$ ):  $\delta$  7.90 (d,  $J = 7.8$  Hz, 1H), 7.56 (t,  $J = 7.2$  Hz, 1H), 7.33 (d,  $J = 8.4$  Hz, 1H), 7.23 – 7.18 (m, 3H), 7.05 (s, 2H), 6.86 (d,  $J = 8.7$  Hz, 2H), 6.19 (s, 1H), 5.21 (s, 1H), 3.78 (s, 3H), 3.71 (s, 3H), 1.34 (s, 18H) ppm.  $^{13}\text{C NMR}$  (75 MHz,  $\text{CDCl}_3$ ):  $\delta$  163.3, 158.5, 157.1, 153.0, 139.0, 136.8, 133.5, 131.5, 130.6, 129.9, 125.4, 123.4, 121.5, 116.3, 114.3, 114.0, 113.7, 55.2, 46.4, 34.4, 30.2 ppm. **HRMS** ( $m/z$ ):  $[\text{C}_{32}\text{H}_{37}\text{NO}_4+\text{H}]^+$  Calcd 501.2879, Found 501.2885.

**2,6-Di-*tert*-butyl-4-((5,6-diphenylindolo[2,1-*a*]isoquinolin-12-yl)(4-methoxyphenyl)methyl)phenol (7)**

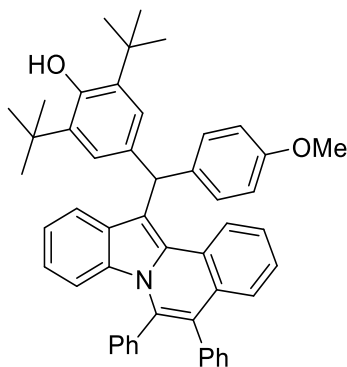

White solid, Mp (236-238°C), Yield: 80% (32 mg);  $^1\text{H NMR}$  (300 MHz,  $\text{CDCl}_3$ ):  $\delta$  8.51 (d,  $J$  = 7.8 Hz, 1H), 7.40 – 7.35 (m, 6H), 7.30 – 7.15 (m, 11H), 7.09 (d,  $J$  = 8.1 Hz, 1H), 6.95 – 6.84 (m, 3H), 6.73 (t,  $J$  = 7.8 Hz, 1H), 6.53 (s, 1H), 6.06 (d,  $J$  = 8.7 Hz, 1H), 5.08 (s, 1H), 3.81 (s, 3H), 1.37 (s, 18H) ppm.  $^{13}\text{C NMR}$  (75 MHz,  $\text{CDCl}_3$ ):  $\delta$  158.0, 152.1, 137.2, 136.8, 136.2, 136.0, 135.8, 134.0, 132.2, 132.0, 131.9, 131.8, 131.7, 131.03, 131.01, 130.3, 130.0, 128.5, 128.51, 128.4, 127.9, 127.8, 126.6, 126.4, 126.3, 126.2, 125.8, 125.5, 121.3, 121.1, 120.6, 120.0, 114.3, 113.9, 113.7, 55.2, 48.2, 34.4, 30.4 ppm. HRMS ( $m/z$ ):  $[\text{C}_{50}\text{H}_{48}\text{NO}_4+\text{H}]^+$  Calcd 694.3685, Found 694.3661.

**3-((3,5-Di-tert-butyl-4-hydroxyphenyl)(4-methoxyphenyl)methyl)-5,6-diphenyl-2H-pyrano[2,3,4-*de*]chromen-2-one (8)**

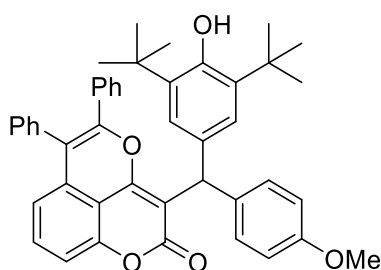

White solid, Mp (202-204 °C), Yield: 75% (31 mg);  $^1\text{H NMR}$  (300 MHz,  $\text{CDCl}_3$ ):  $\delta$  7.44 – 7.34 (m, 4H), 7.31 – 7.25 (m, 5H), 7.19 – 7.14 (m, 2H), 7.03 (t,  $J$  = 7.6 Hz, 2H), 6.85 (d,  $J$  = 8.7 Hz, 2H), 6.76 – 6.70 (m, 3H), 5.83 (s, 1H), 5.08 (s, 1H), 3.83 (s, 3H), 1.31 (s, 18H) ppm.  $^{13}\text{C NMR}$  (75 MHz,  $\text{CDCl}_3$ ):  $\delta$  163.1, 158.1, 157.9, 152.5, 152.4, 150.0, 135.8, 134.9, 134.0, 132.6, 132.5, 132.2, 131.7, 131.6, 130.9, 129.3, 129.1, 128.9, 128.3, 128.1, 127.7, 125.9, 117.9, 116.7, 114.7, 113.7, 110.6, 106.6, 55.3, 45.6, 34.3, 30.3 ppm. HRMS ( $m/z$ ):  $[\text{C}_{45}\text{H}_{43}\text{O}_5+\text{H}]^+$  Calcd 663.3110, Found 663.3112.

## References

1. D. D. Perrin, Armarego, W. L. F. *In Purification of Laboratory Chemicals, 3rd ed.*; Pergamon Press: New York, 1988.
2. (a) L. Roiser, M. Waser, *Org. Lett*, 2017, **19**, 2338. (b) C. Jarava-Barrera, A. Parra, A. Lopez, F. Cruz-Acosta, D. Collado-Sanz, D. J. Cardenas and M. Tortosa, *ACS Catal.*, 2016, **6**, 442. (c) W.-D. Chu, L.-F. Zhang, X. Bao, X.-Y. Zhao, C. Zeng, J.-Y. Du, G.-B. Zhang, F. Z. Wang, Z.-Y. Ma, C.-A. Fan, *Angew. Chem. Int. Ed.*, 2013, **52**, 9229.
3. (a) T. Yoshino, H. Ikemoto, S. Matsunaga, M. Kanai, *Angew. Chem. Int. Ed.* 2013, **52**, 2207. (b) W. Li, L.-H. Weng, G.-X. Jin, *Inorg. Chem. Commun.* 2004, **7**, 1174.

$^1\text{H}$  and  $^{13}\text{C}$  NMR for compound **3a**

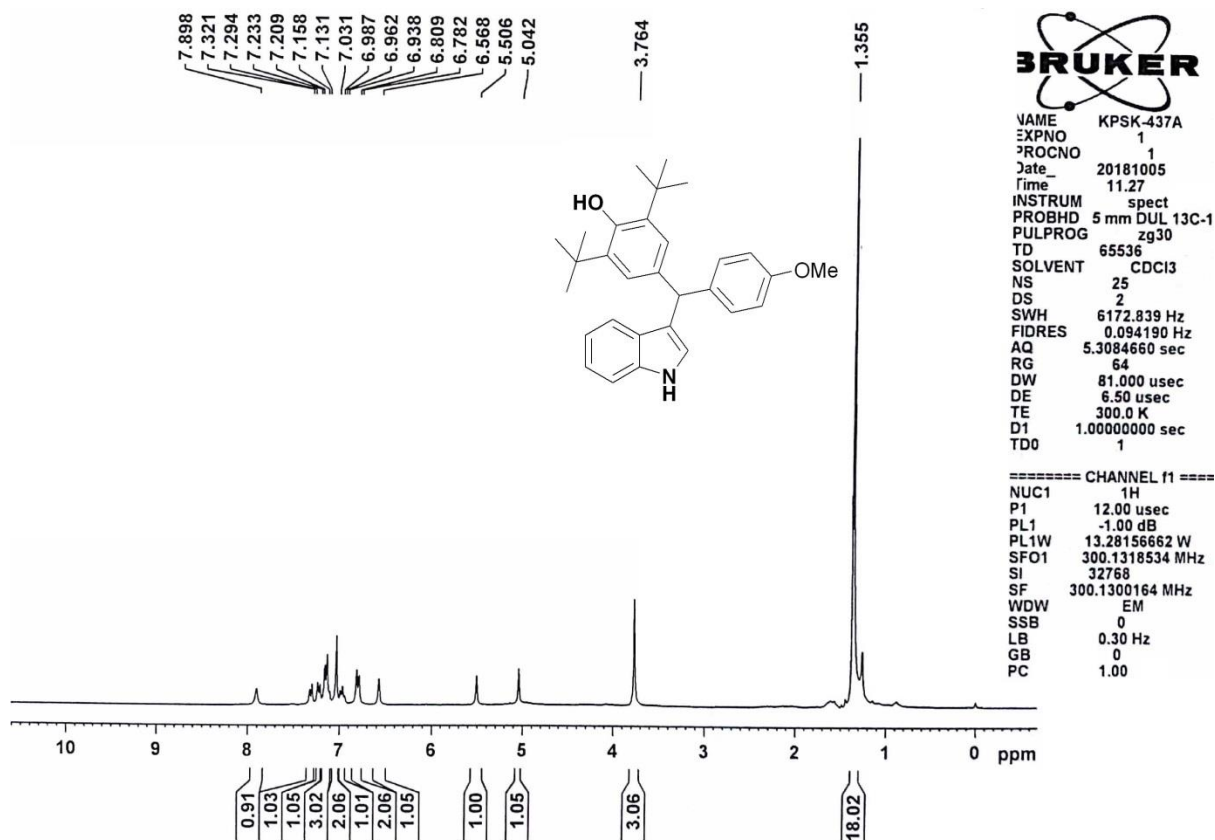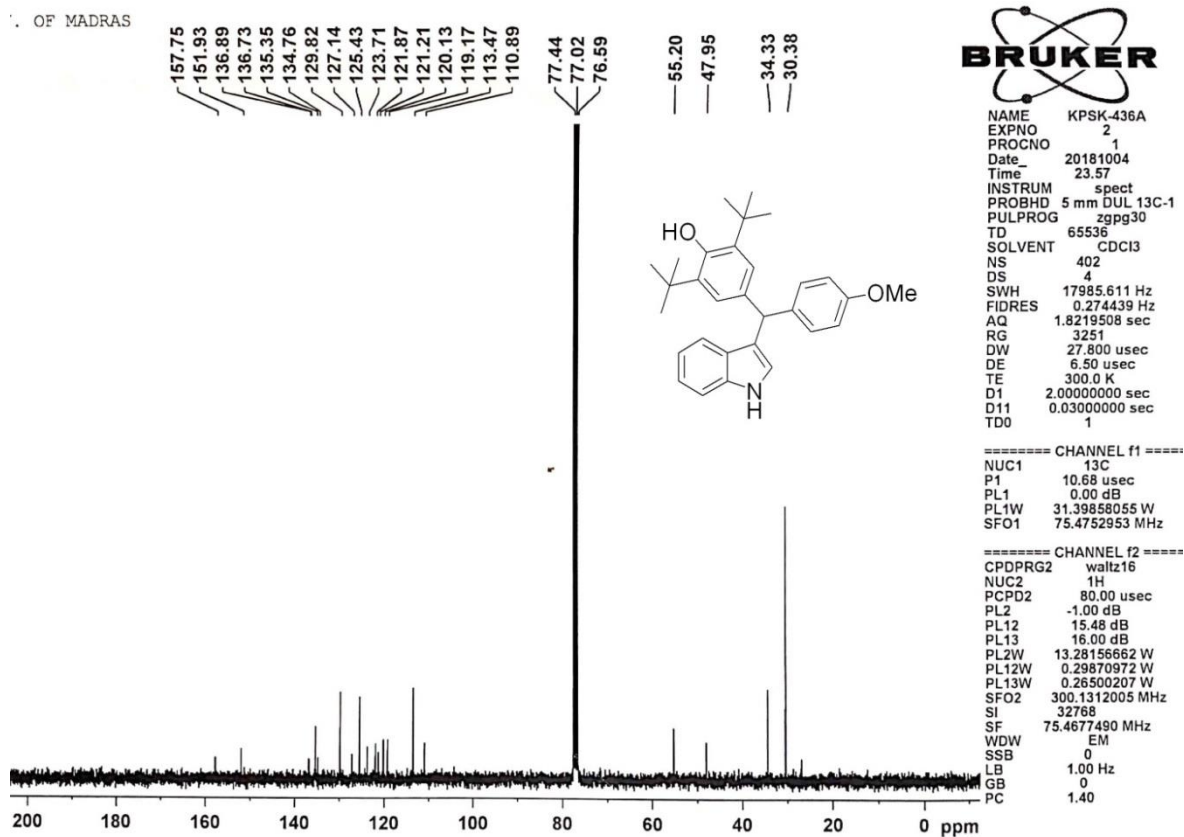

$^1\text{H}$  and  $^{13}\text{C}$  NMR for compound **3b**

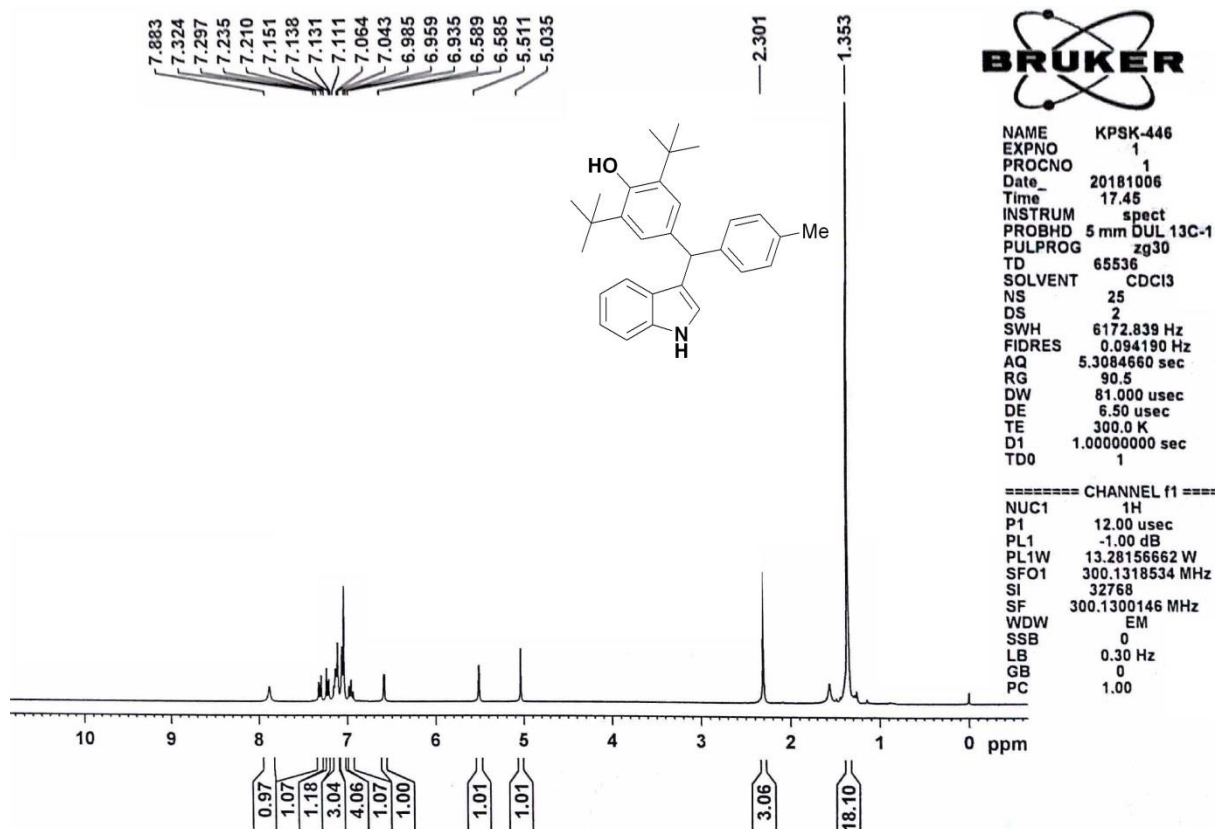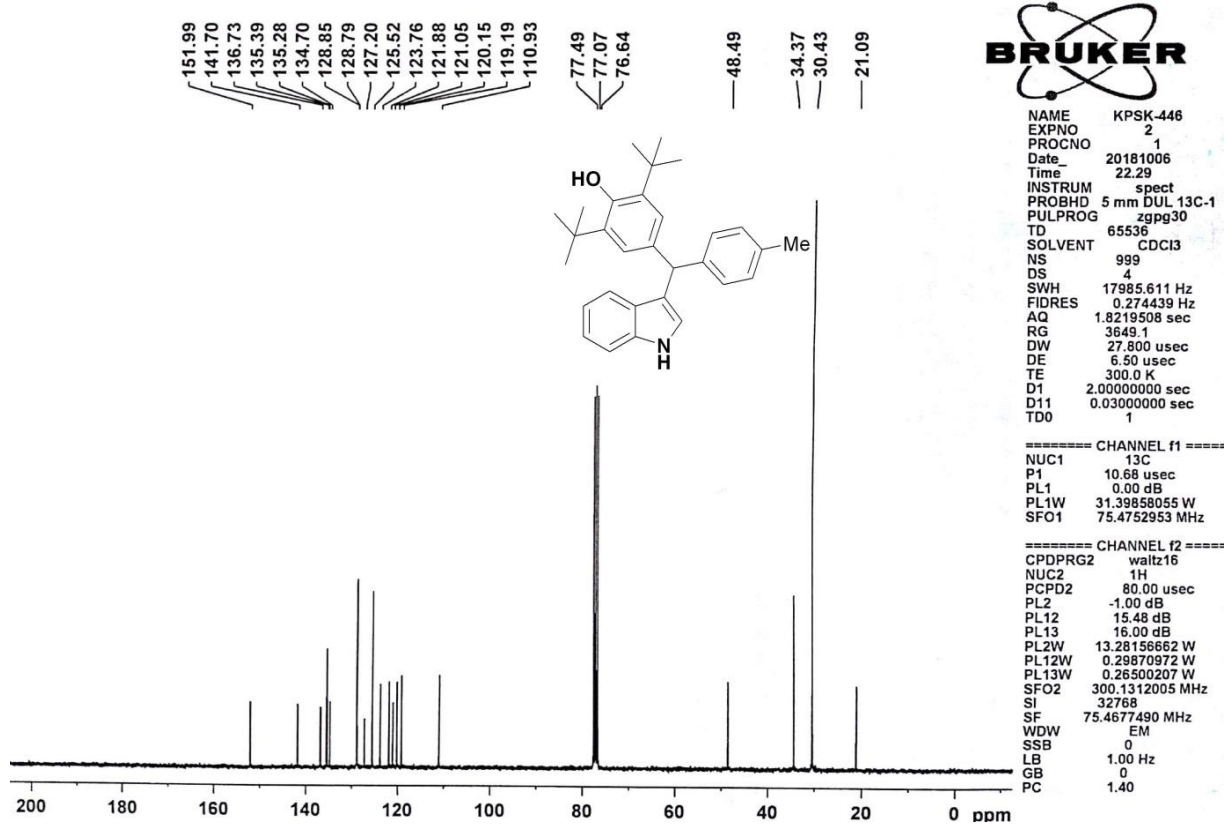



$^1\text{H}$  and  $^{13}\text{C}$  NMR for compound **3c**

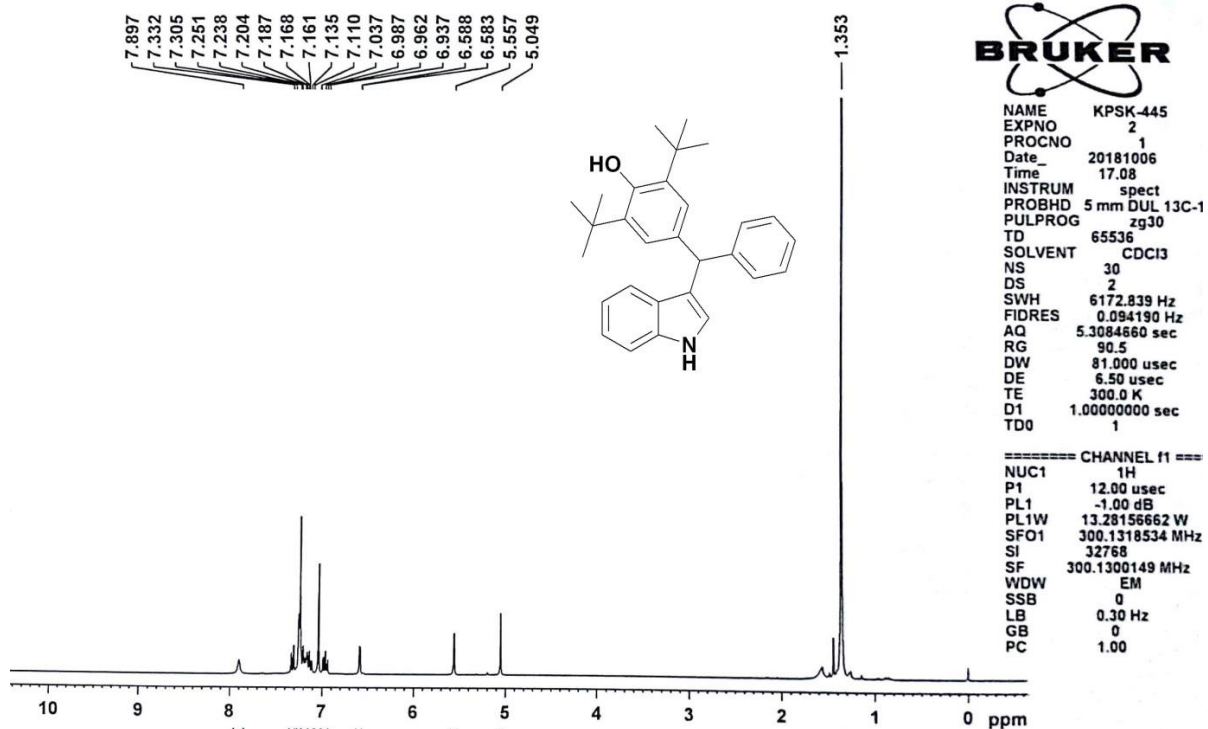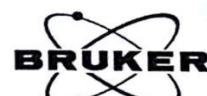

NAME KPSK-445  
 EXPNO 2  
 PROCNO 1  
 Date\_ 20181006  
 Time 17.08  
 INSTRUM spect  
 PROBHD 5 mm DUL 13C-1  
 PULPROG zg30  
 TD 65536  
 SOLVENT CDCl3  
 NS 30  
 DS 2  
 SWH 6172.839 Hz  
 FIDRES 0.094190 Hz  
 AQ 5.3084660 sec  
 RG 90.5  
 DW 81.000 usec  
 DE 6.50 usec  
 TE 300.0 K  
 D1 1.00000000 sec  
 TDO 1

===== CHANNEL f1 =====  
 NUC1 1H  
 P1 12.00 usec  
 PL1 -1.00 dB  
 PL1W 13.28156662 W  
 SFO1 300.1318534 MHz  
 SI 32768  
 SF 300.1300149 MHz  
 WDW EM  
 SSB 0  
 LB 0.30 Hz  
 GB 0  
 PC 1.00

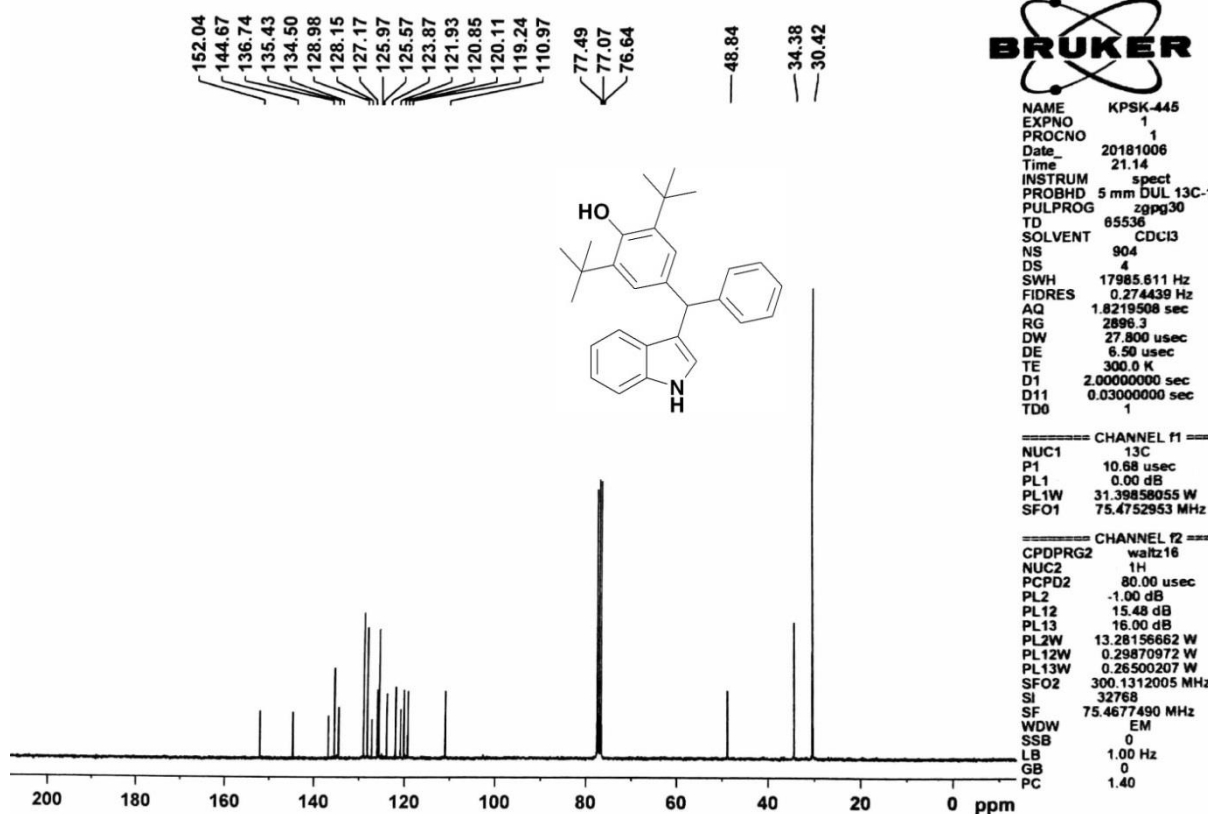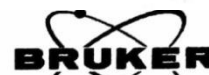

NAME KPSK-445  
 EXPNO 1  
 PROCNO 1  
 Date\_ 20181006  
 Time 21.14  
 INSTRUM spect  
 PROBHD 5 mm DUL 13C-1  
 PULPROG zgpg30  
 TD 65536  
 SOLVENT CDCl3  
 NS 904  
 DS 4  
 SWH 17985.611 Hz  
 FIDRES 0.274439 Hz  
 AQ 1.8219508 sec  
 RG 2896.3  
 DW 27.800 usec  
 DE 6.50 usec  
 TE 300.0 K  
 D1 2.00000000 sec  
 D11 0.03000000 sec  
 TDO 1

===== CHANNEL f1 =====  
 NUC1 13C  
 P1 10.68 usec  
 PL1 0.00 dB  
 PL1W 31.39858055 W  
 SFO1 75.4752953 MHz

===== CHANNEL f2 =====  
 CPDPRG2 waltz16  
 NUC2 1H  
 PCPD2 80.00 usec  
 PL2 -1.00 dB  
 PL12 15.48 dB  
 PL13 16.00 dB  
 PL2W 13.28156662 W  
 PL12W 0.29870972 W  
 PL13W 0.26500207 W  
 SFO2 300.1312005 MHz  
 SI 32768  
 SF 75.4677490 MHz  
 WDW EM  
 SSB 0  
 LB 1.00 Hz  
 GB 0  
 PC 1.40

$^1\text{H}$  and  $^{13}\text{C}$  NMR for compound **3d**

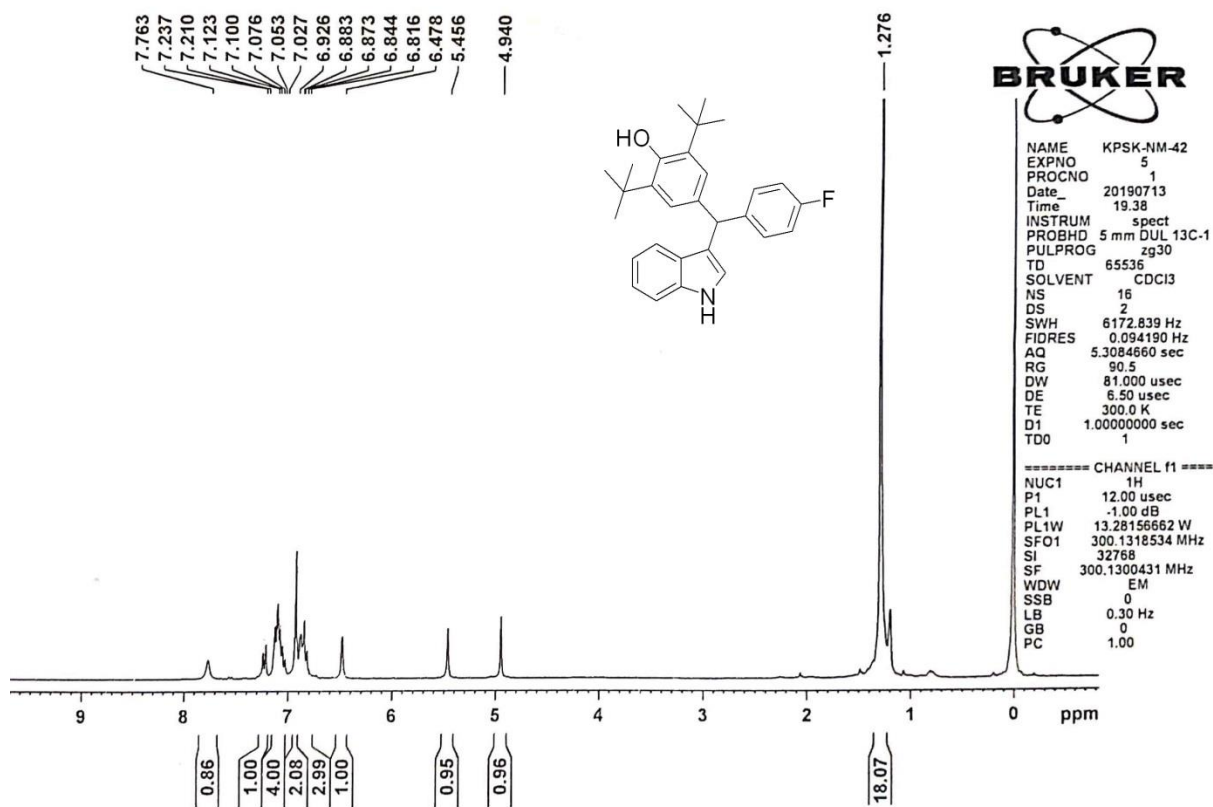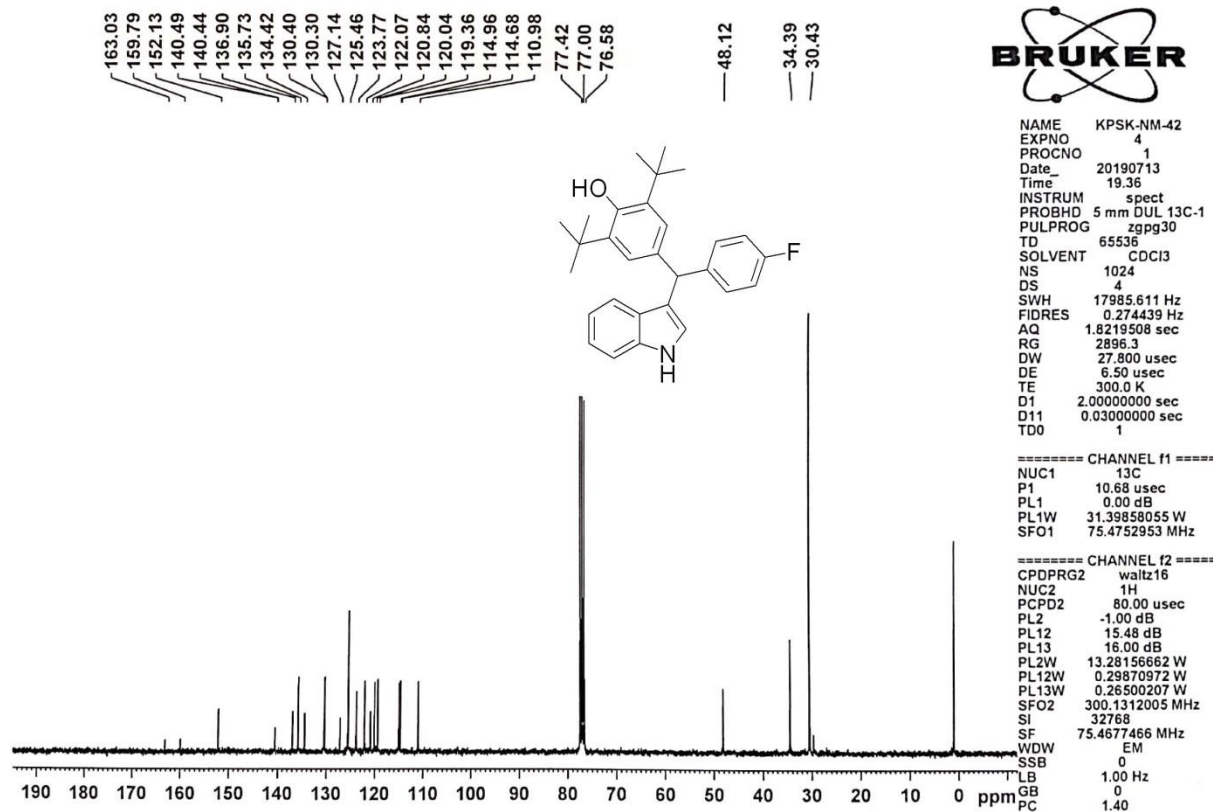

$^1\text{H}$  and  $^{13}\text{C}$  NMR for compound **3e**

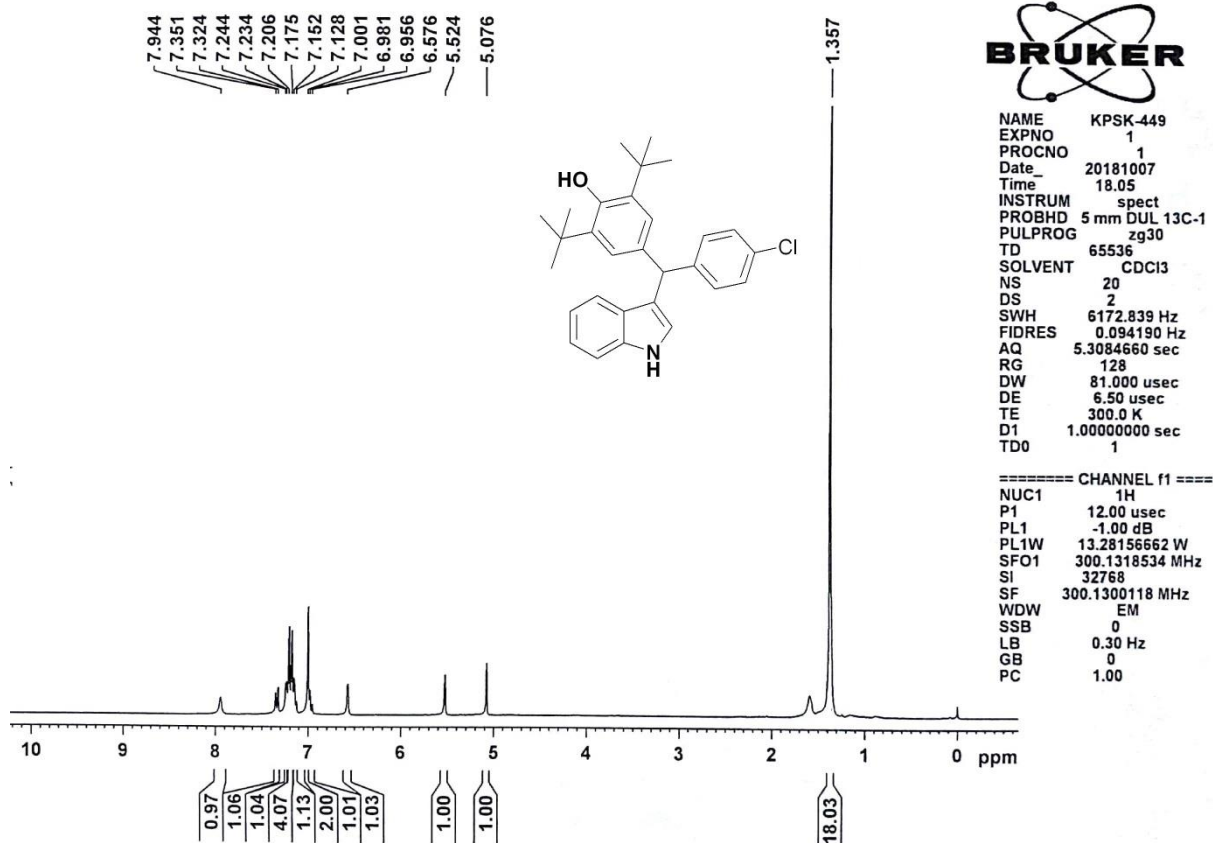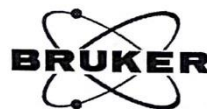

NAME KPSK-449  
 EXPNO 1  
 PROCNO 1  
 Date\_ 20181007  
 Time 18.05  
 INSTRUM spect  
 PROBHD 5 mm DUL 13C-1  
 PULPROG zg30  
 TD 65536  
 SOLVENT CDCl3  
 NS 20  
 DS 2  
 SWH 6172.839 Hz  
 FIDRES 0.094190 Hz  
 AQ 5.3084660 sec  
 RG 128  
 DW 81.000 usec  
 DE 6.50 usec  
 TE 300.0 K  
 D1 1.00000000 sec  
 TD0 1

===== CHANNEL f1 =====  
 NUC1  $^1\text{H}$   
 P1 12.00 usec  
 PL1 -1.00 dB  
 PL1W 13.28156662 W  
 SFO1 300.1318534 MHz  
 SI 32768  
 SF 300.1300118 MHz  
 WDW EM  
 SSB 0  
 LB 0.30 Hz  
 GB 0  
 PC 1.00

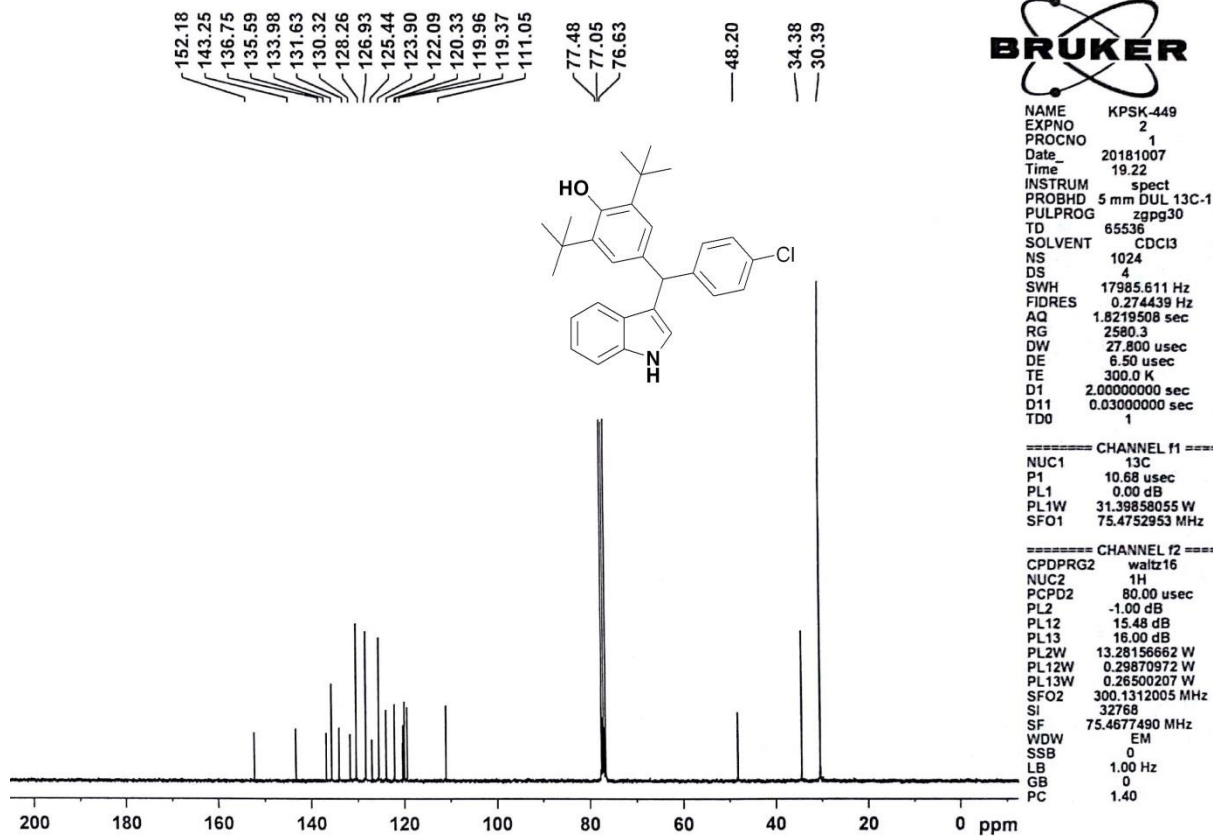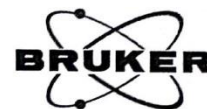

NAME KPSK-449  
 EXPNO 2  
 PROCNO 1  
 Date\_ 20181007  
 Time 19.22  
 INSTRUM spect  
 PROBHD 5 mm DUL 13C-1  
 PULPROG zgpg30  
 TD 65536  
 SOLVENT CDCl3  
 NS 1024  
 DS 4  
 SWH 17985.611 Hz  
 FIDRES 0.274439 Hz  
 AQ 1.8219508 sec  
 RG 2580.3  
 DW 27.800 usec  
 DE 6.50 usec  
 TE 300.0 K  
 D1 2.00000000 sec  
 D11 0.03000000 sec  
 TD0 1

===== CHANNEL f1 =====  
 NUC1  $^{13}\text{C}$   
 P1 10.68 usec  
 PL1 0.00 dB  
 PL1W 31.39858055 W  
 SFO1 75.4752953 MHz

===== CHANNEL f2 =====  
 CPDPRG2 waltz16  
 NUC2  $^1\text{H}$   
 PCPD2 80.00 usec  
 PL2 -1.00 dB  
 PL12 15.48 dB  
 PL13 16.00 dB  
 PL2W 13.28156662 W  
 PL12W 0.29870972 W  
 PL13W 0.26500207 W  
 SFO2 300.1312005 MHz  
 SI 32768  
 SF 75.4677480 MHz  
 WDW EM  
 SSB 0  
 LB 1.00 Hz  
 GB 0  
 PC 1.40

$^1\text{H}$  and  $^{13}\text{C}$  NMR for compound **3f**

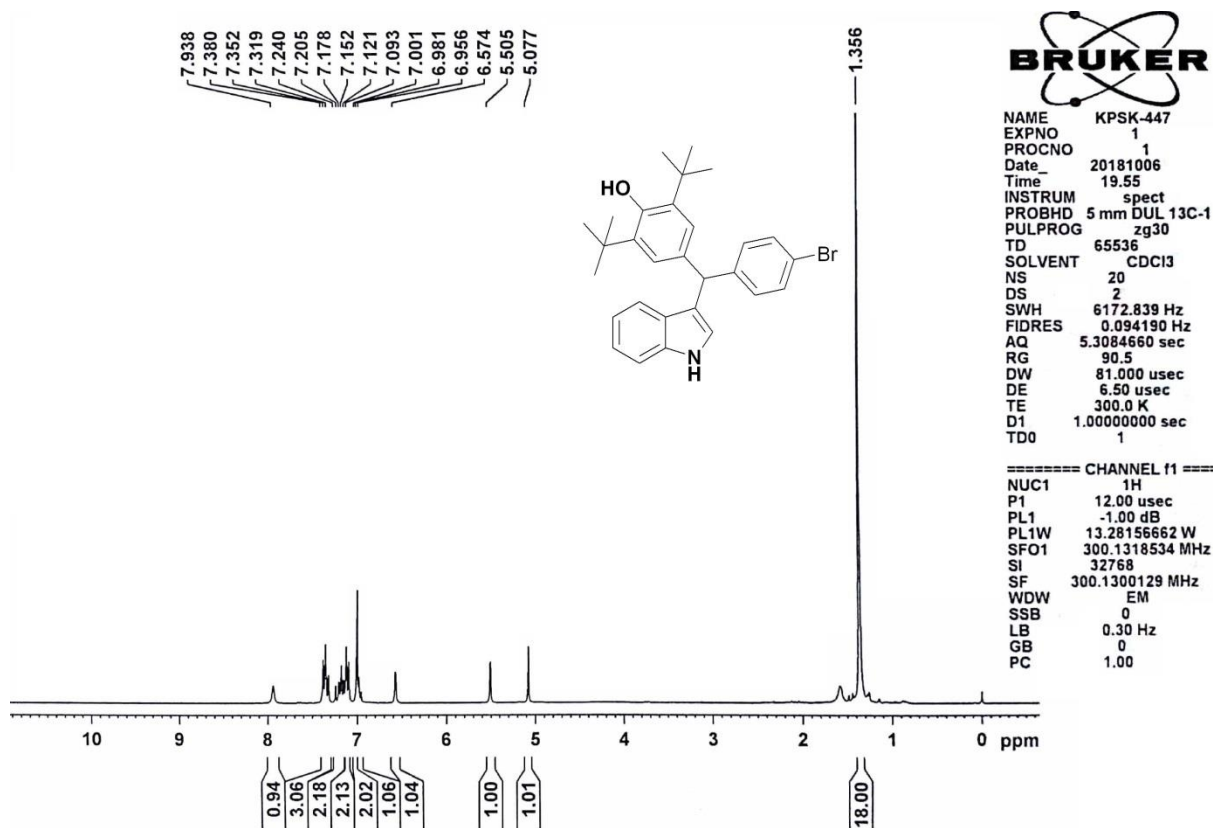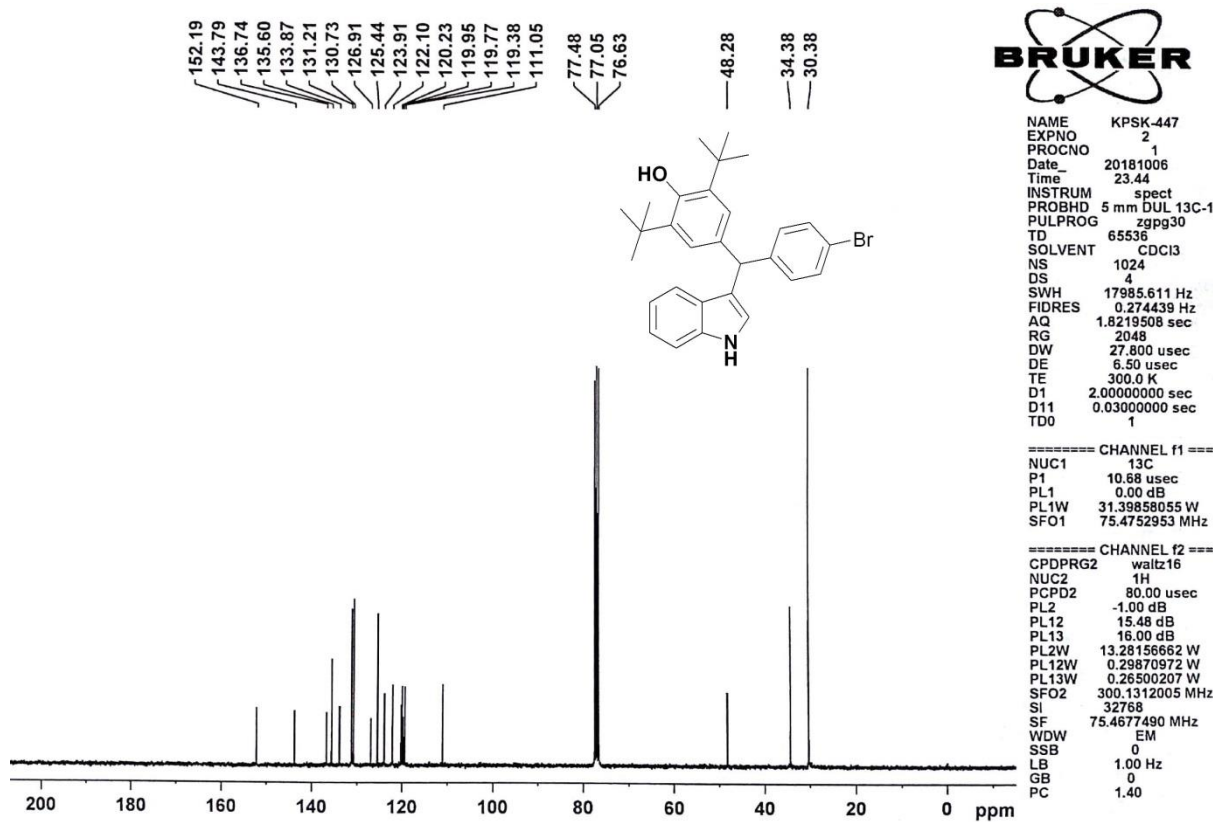

$^1\text{H}$  and  $^{13}\text{C}$  NMR for compound **3g**

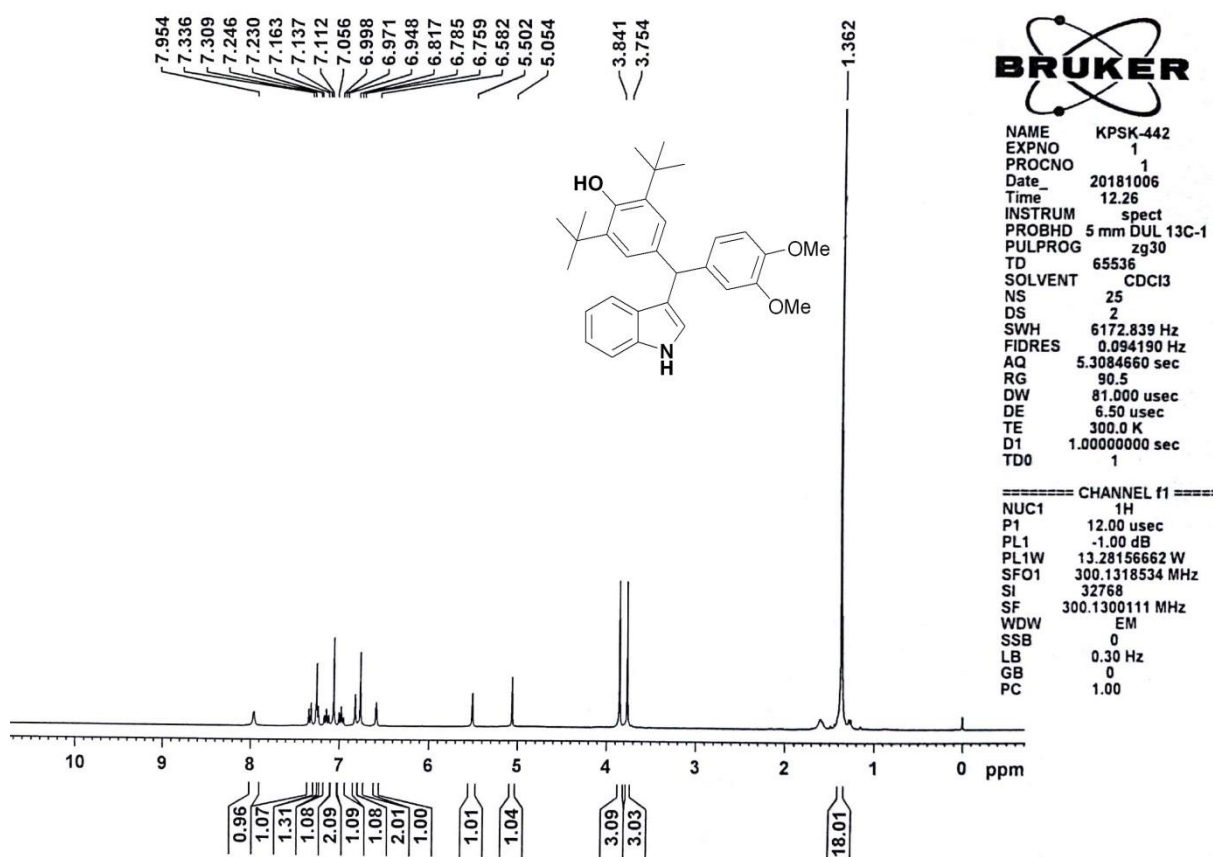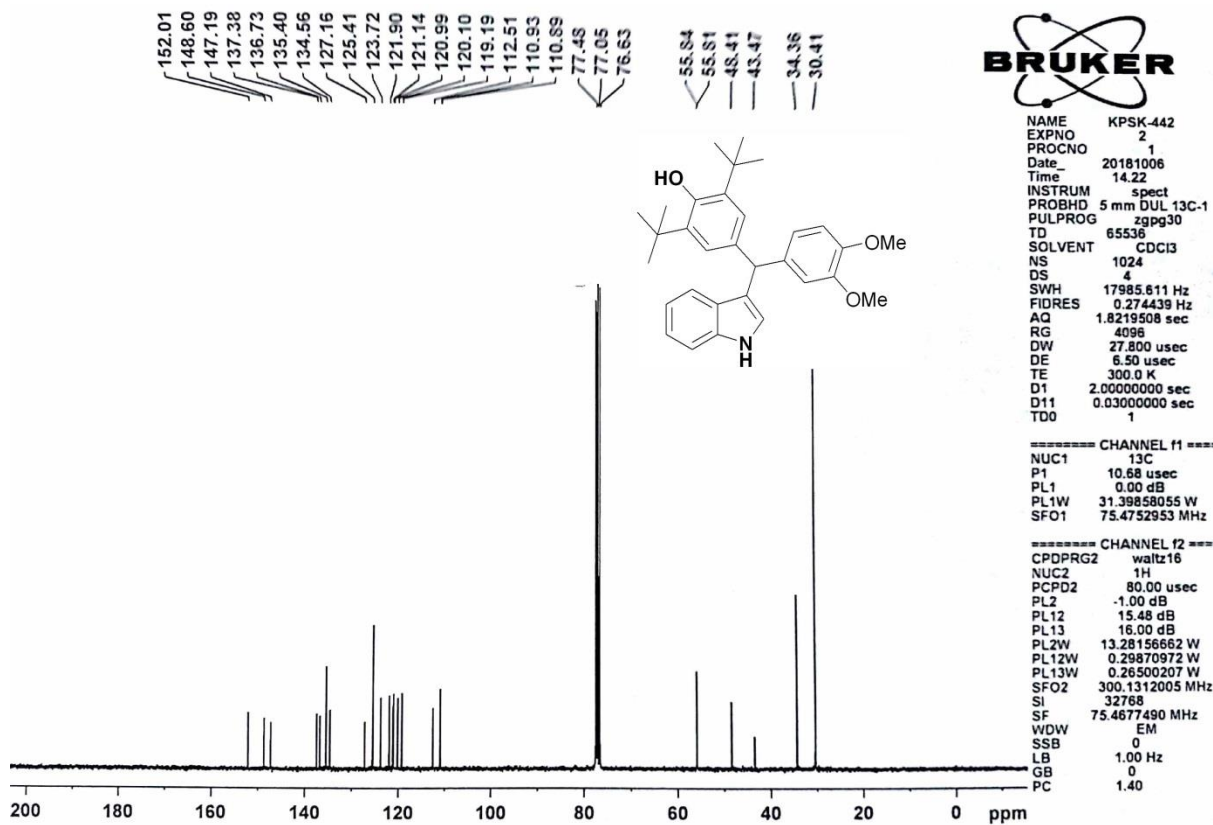

$^1\text{H}$  and  $^{13}\text{C}$  NMR for compound **3h**

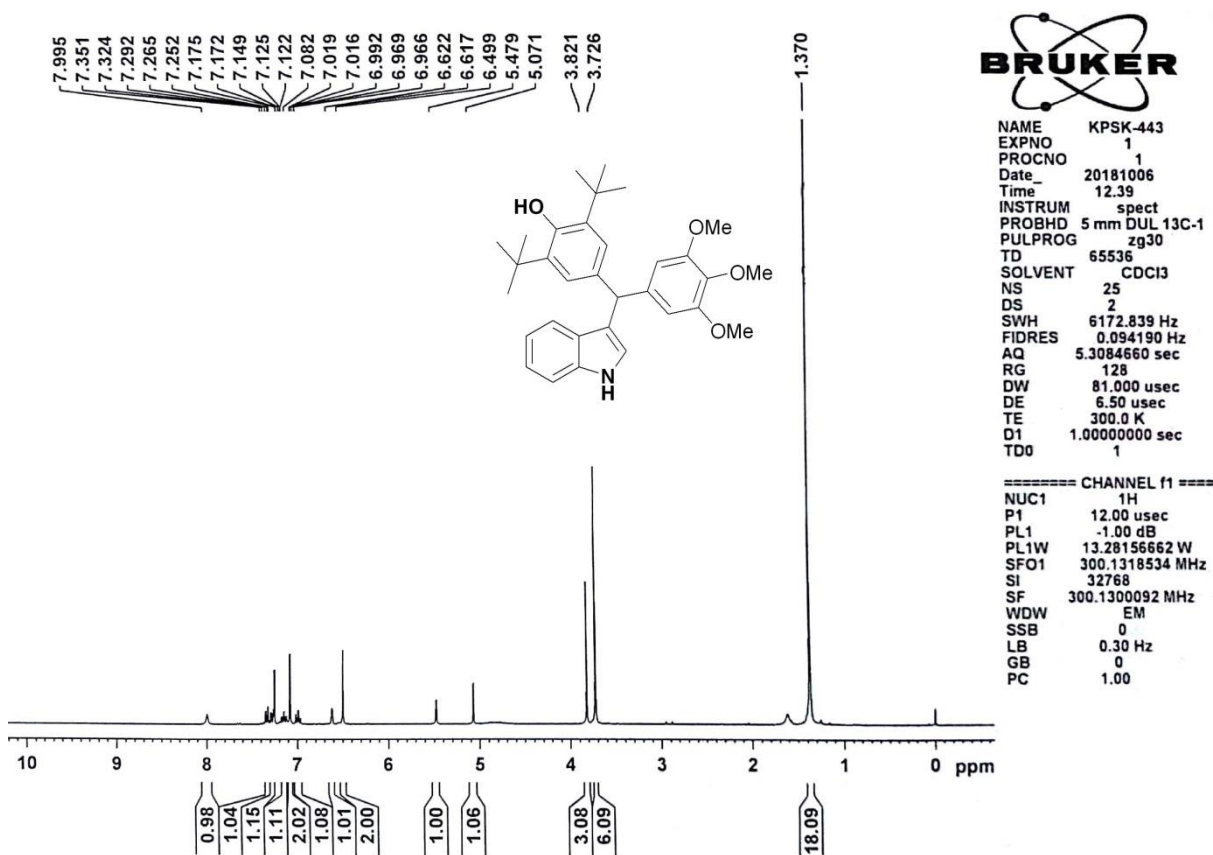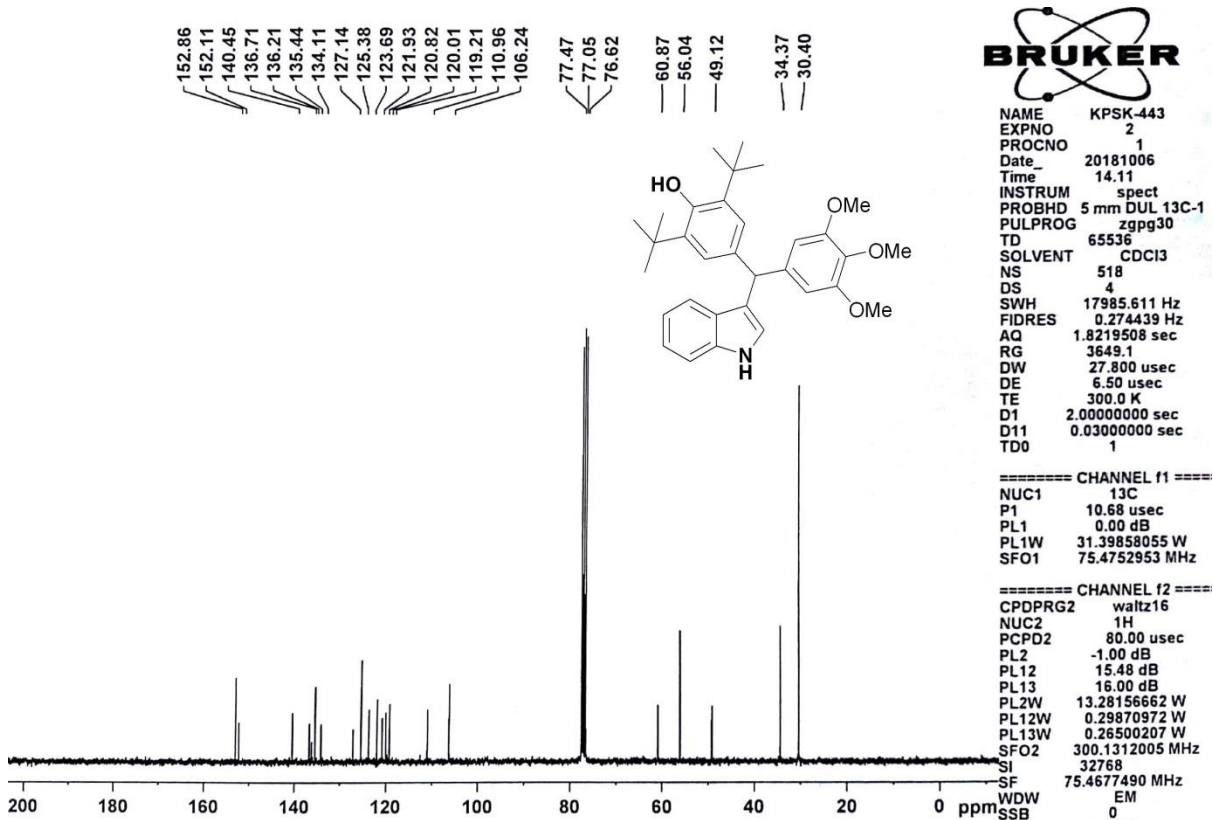

$^1\text{H}$  and  $^{13}\text{C}$  NMR for compound **3i**

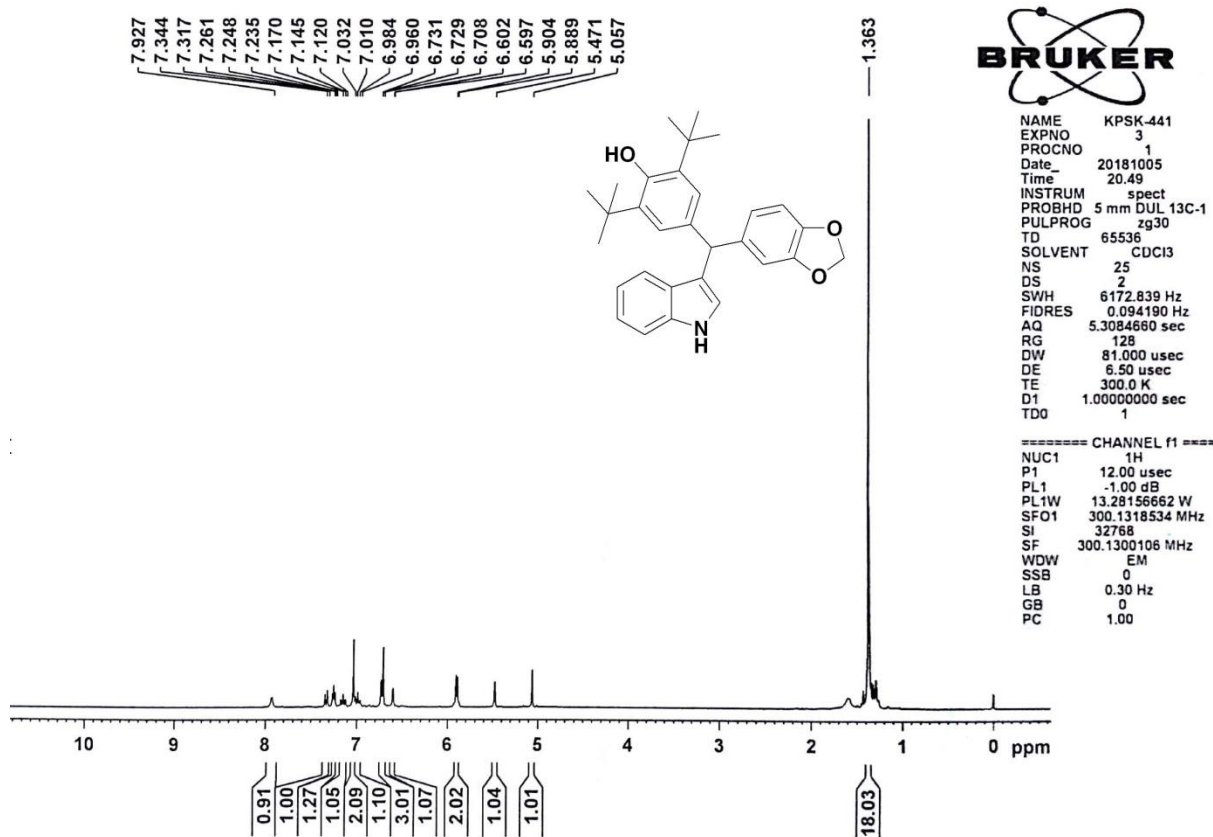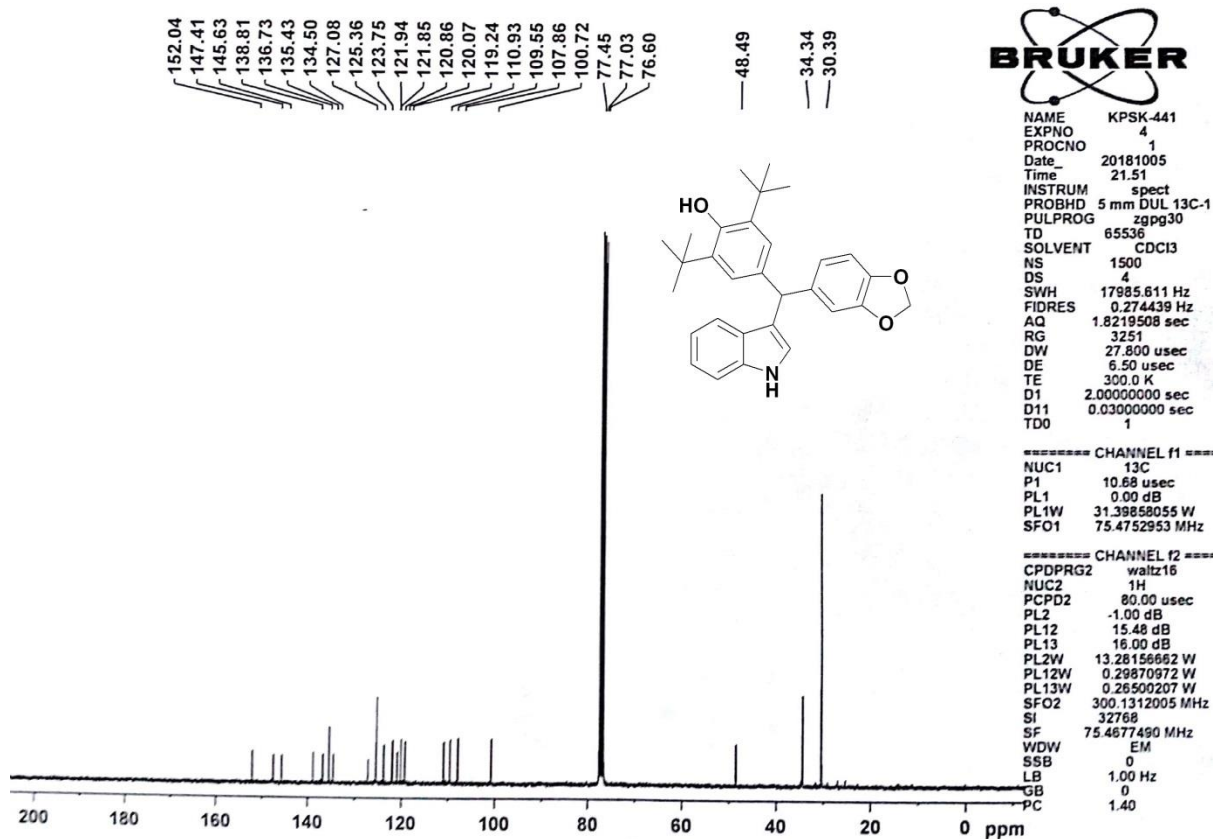

$^1\text{H}$  and  $^{13}\text{C}$  NMR for compound **3j**

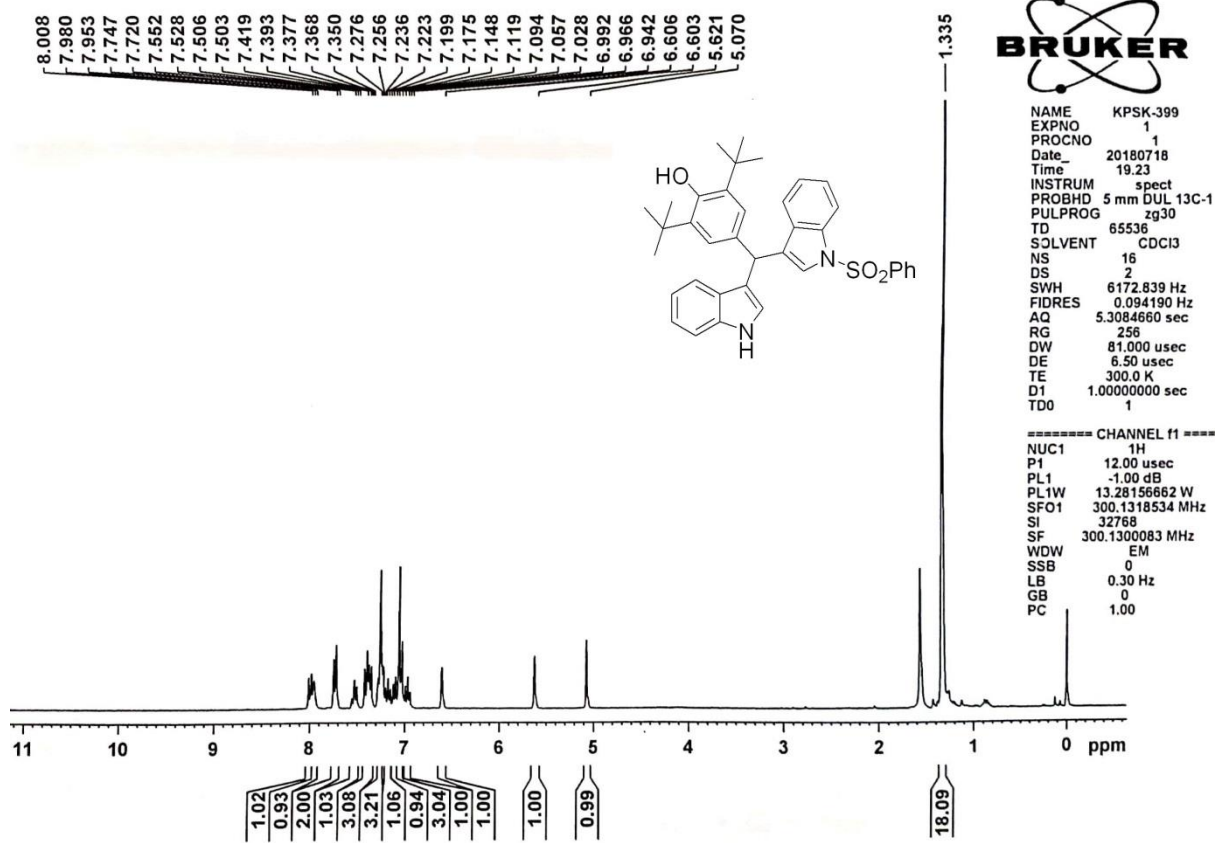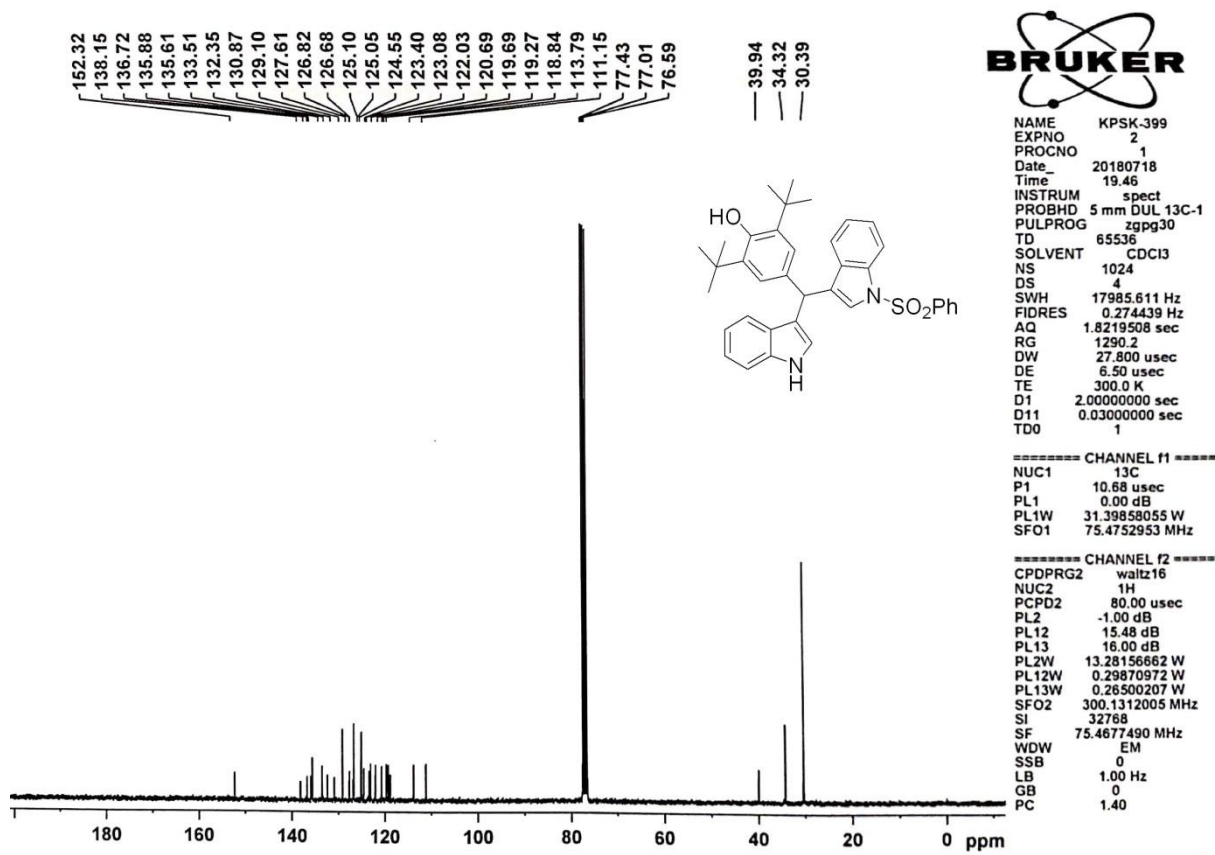



$^1\text{H}$  and  $^{13}\text{C}$  NMR for compound **3k**

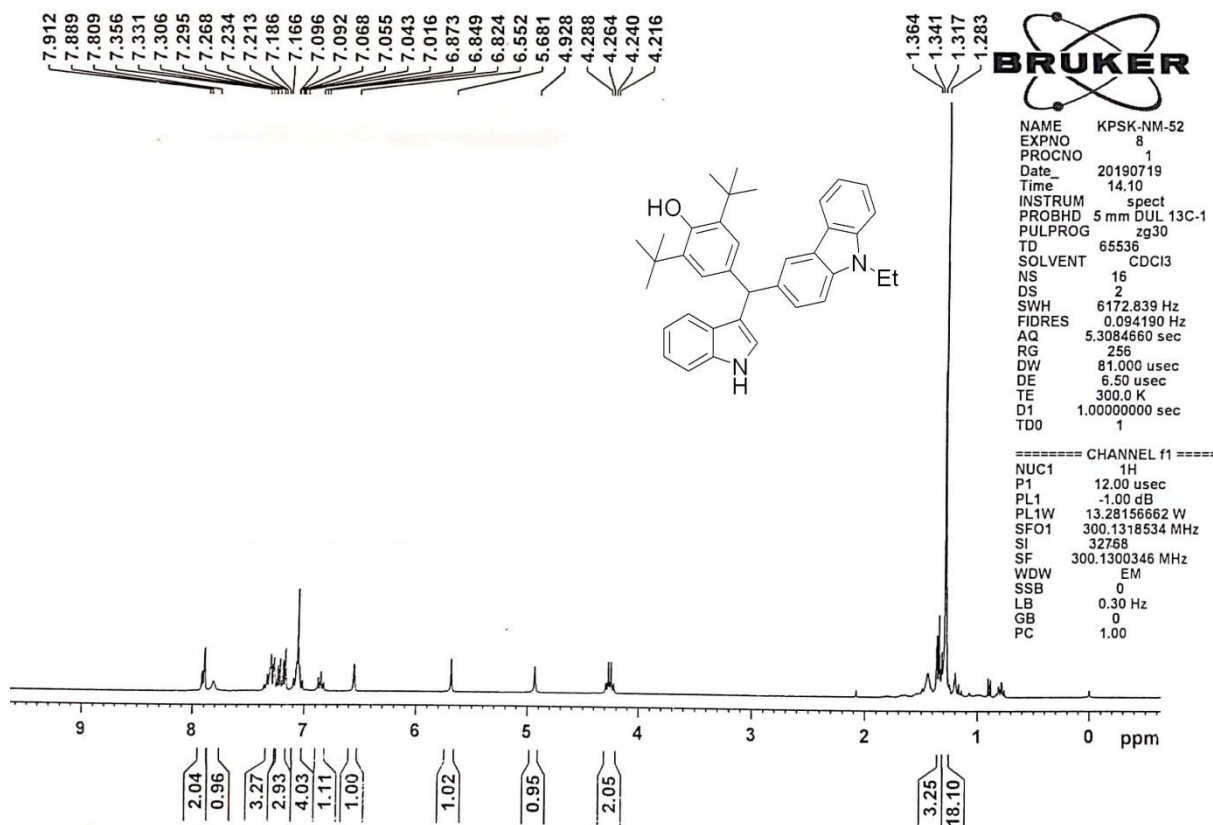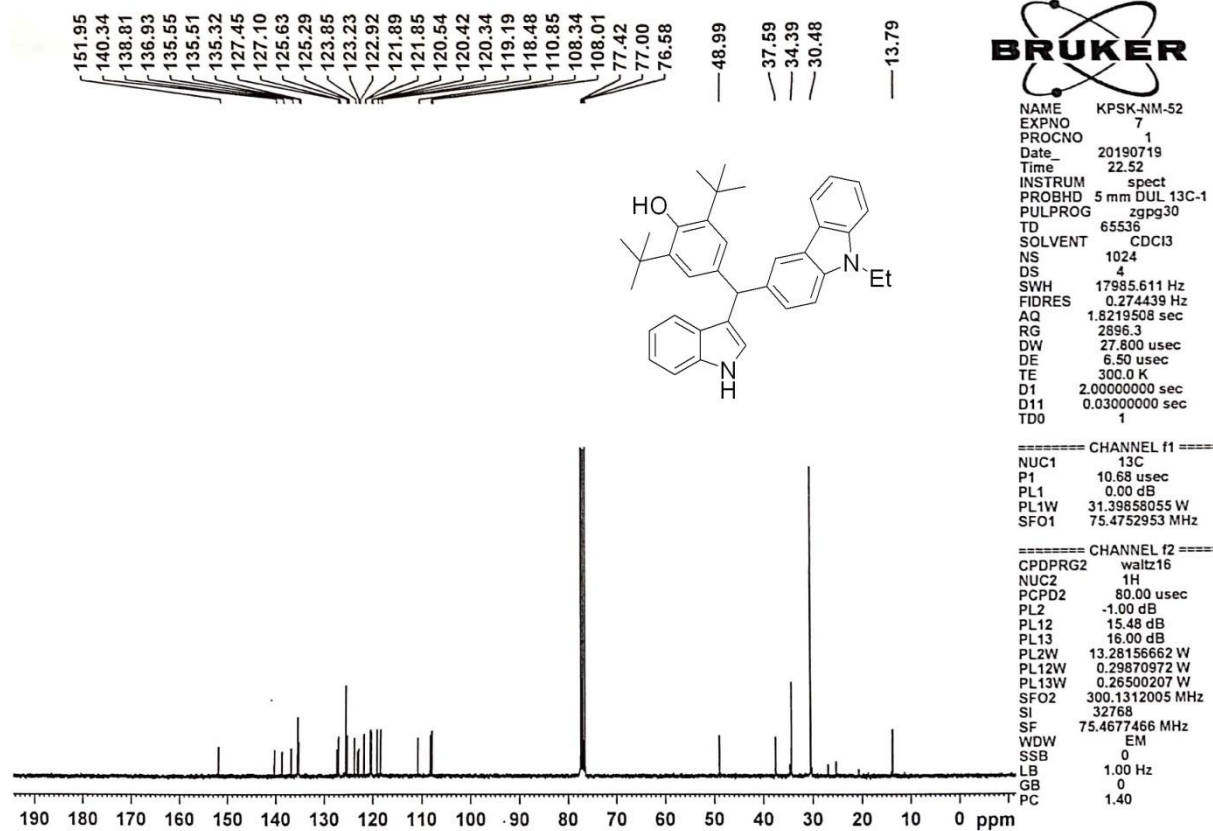

$^1\text{H}$  and  $^{13}\text{C}$  NMR for compound **3I**

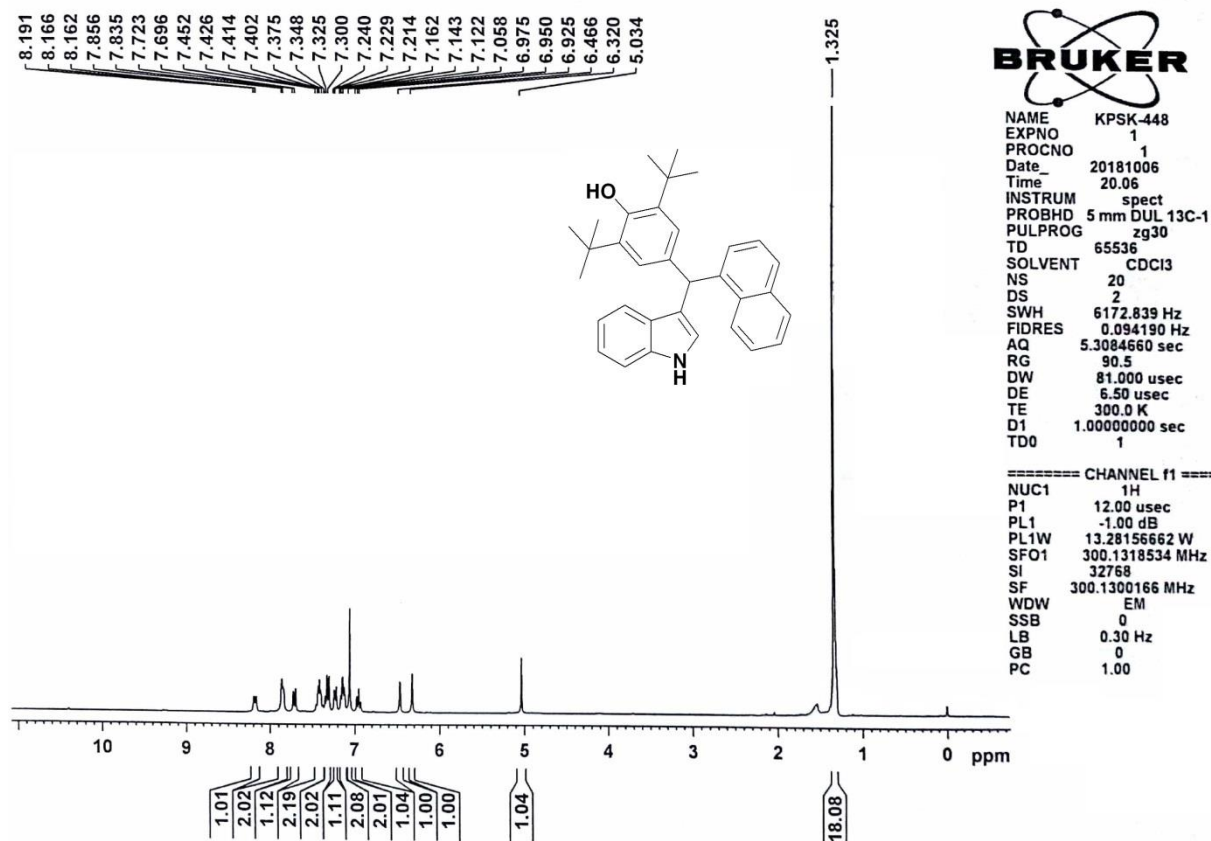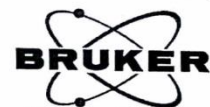

NAME KPSK-448  
 EXPNO 1  
 PROCNO 1  
 Date\_ 20181006  
 Time 20.06  
 INSTRUM spect  
 PROBHD 5 mm DUL 13C-1  
 PULPROG zg30  
 TD 65536  
 SOLVENT CDCl3  
 NS 20  
 DS 2  
 SWH 6172.839 Hz  
 FIDRES 0.094190 Hz  
 AQ 5.3084660 sec  
 RG 90.5  
 DW 81.000 usec  
 DE 6.50 usec  
 TE 300.0 K  
 D1 1.00000000 sec  
 TD0 1

==== CHANNEL f1 ====  
 NUC1  $^1\text{H}$   
 P1 12.00 usec  
 PL1 -1.00 dB  
 PL1W 13.28156662 W  
 SFO1 300.1318534 MHz  
 SI 32768  
 SF 300.1300166 MHz  
 WDW EM  
 SSB 0  
 LB 0.30 Hz  
 GB 0  
 PC 1.00

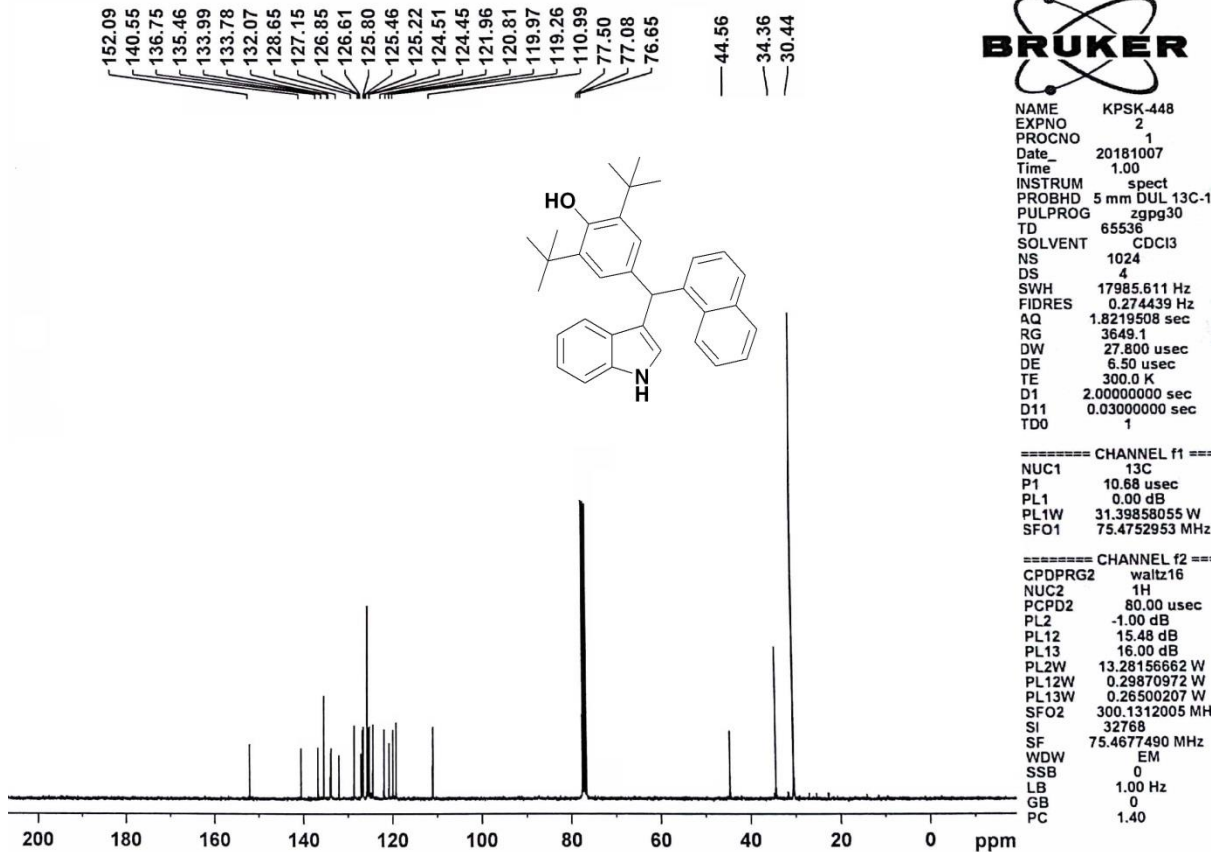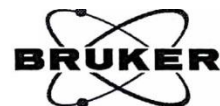

NAME KPSK-448  
 EXPNO 2  
 PROCNO 1  
 Date\_ 20181007  
 Time 1.00  
 INSTRUM spect  
 PROBHD 5 mm DUL 13C-1  
 PULPROG zgpg30  
 TD 65536  
 SOLVENT CDCl3  
 NS 1024  
 DS 4  
 SWH 17985.611 Hz  
 FIDRES 0.274439 Hz  
 AQ 1.8219508 sec  
 RG 364.1  
 DW 27.800 usec  
 DE 6.50 usec  
 TE 300.0 K  
 D1 2.00000000 sec  
 D11 0.03000000 sec  
 TD0 1

==== CHANNEL f1 ====  
 NUC1  $^{13}\text{C}$   
 P1 10.68 usec  
 PL1 0.00 dB  
 PL1W 31.39858055 W  
 SFO1 75.4752953 MHz

==== CHANNEL f2 ====  
 CPDPRG2 waltz16  
 NUC2  $^1\text{H}$   
 PCPD2 80.00 usec  
 PL2 -1.00 dB  
 PL12 15.48 dB  
 PL13 16.00 dB  
 PL2W 13.28156662 W  
 PL12W 0.29870972 W  
 PL13W 0.26500207 W  
 SFO2 300.1312005 MHz  
 SI 32768  
 SF 75.4677490 MHz  
 WDW EM  
 SSB 0  
 LB 1.00 Hz  
 GB 0  
 PC 1.40

$^1\text{H}$  and  $^{13}\text{C}$  NMR for compound **3m**

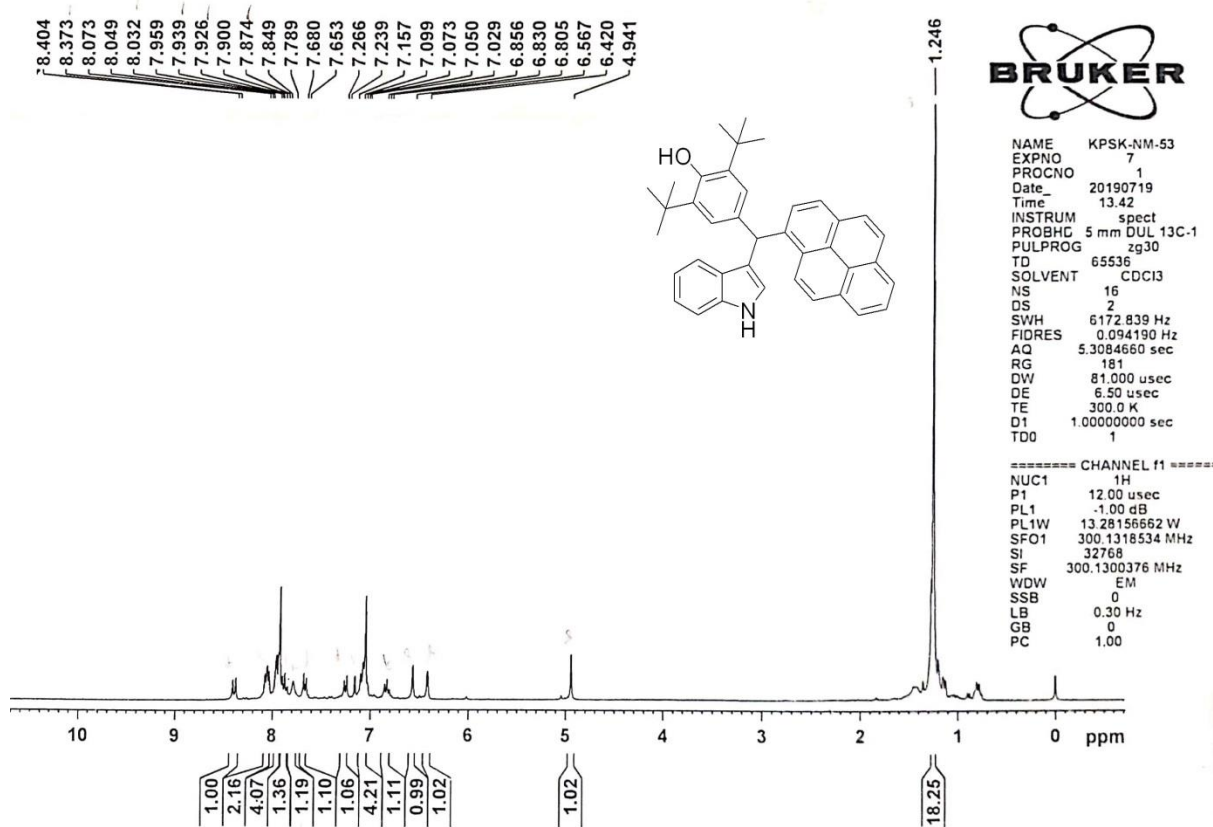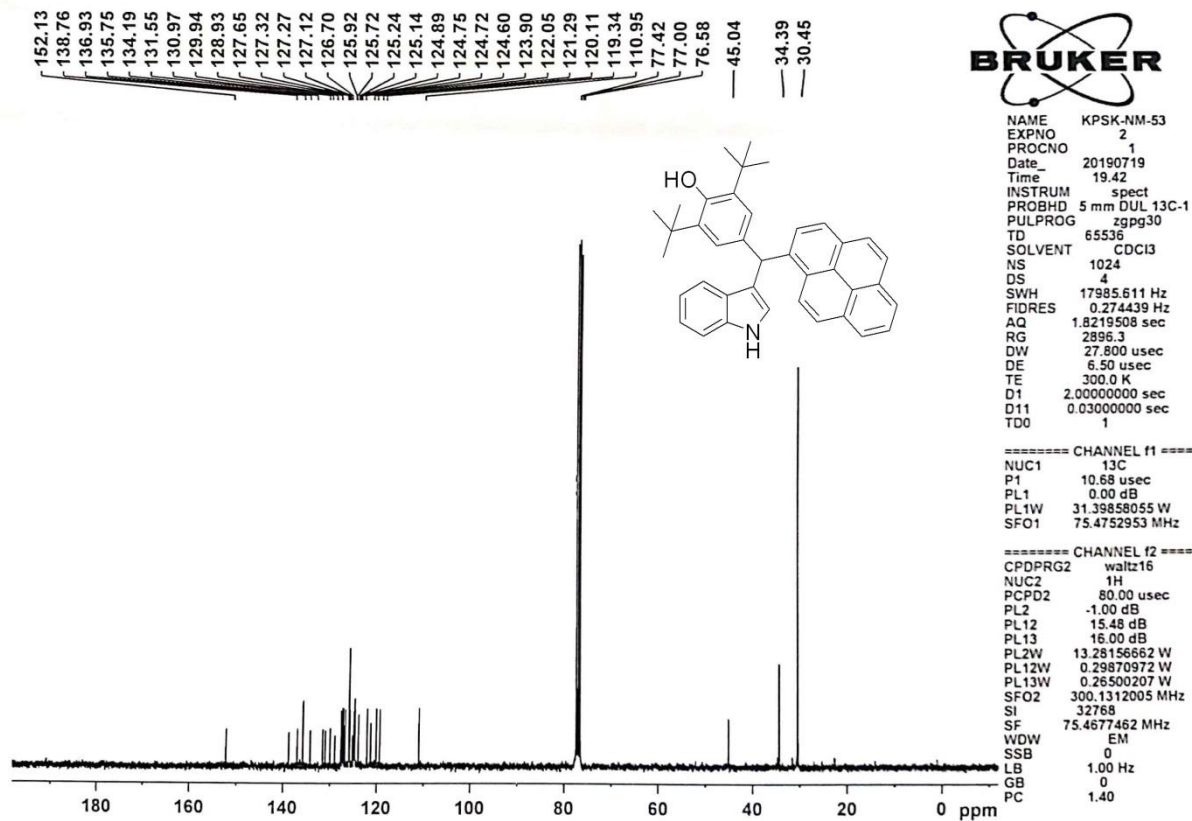

$^1\text{H}$  and  $^{13}\text{C}$  NMR for compound **3n**

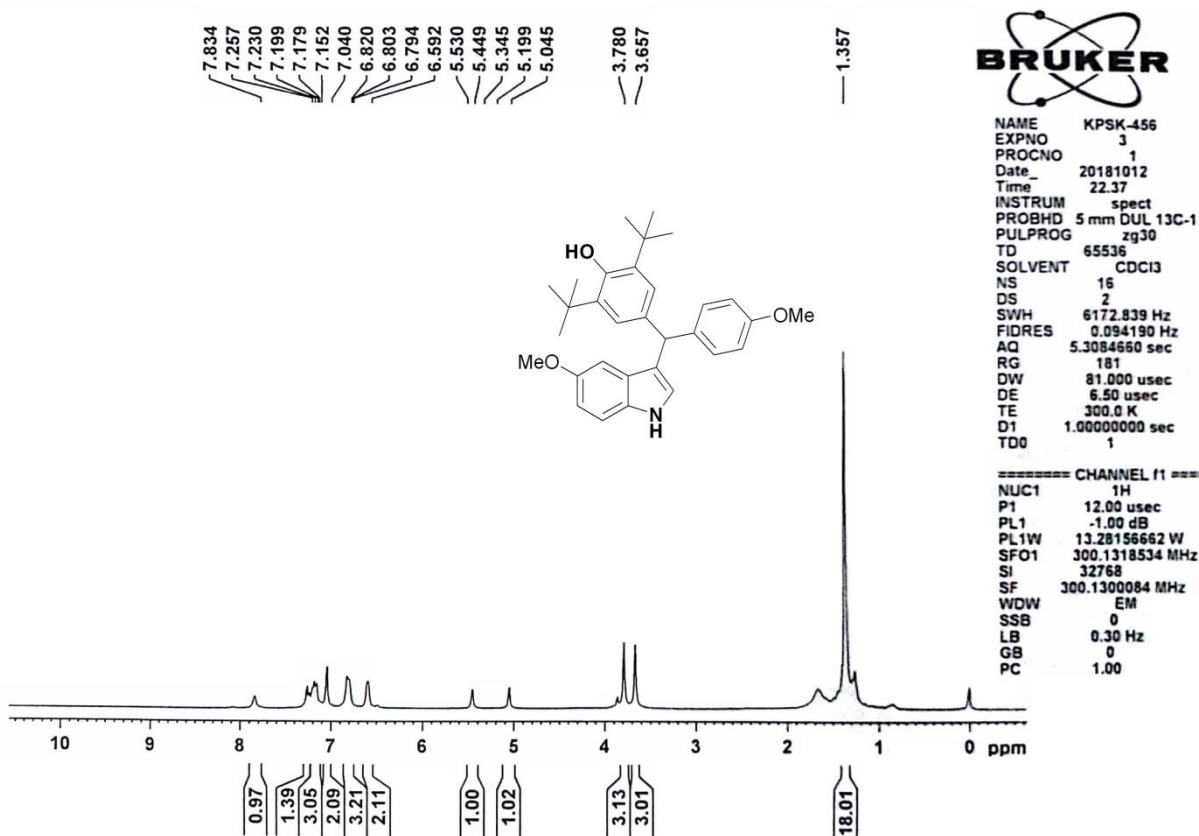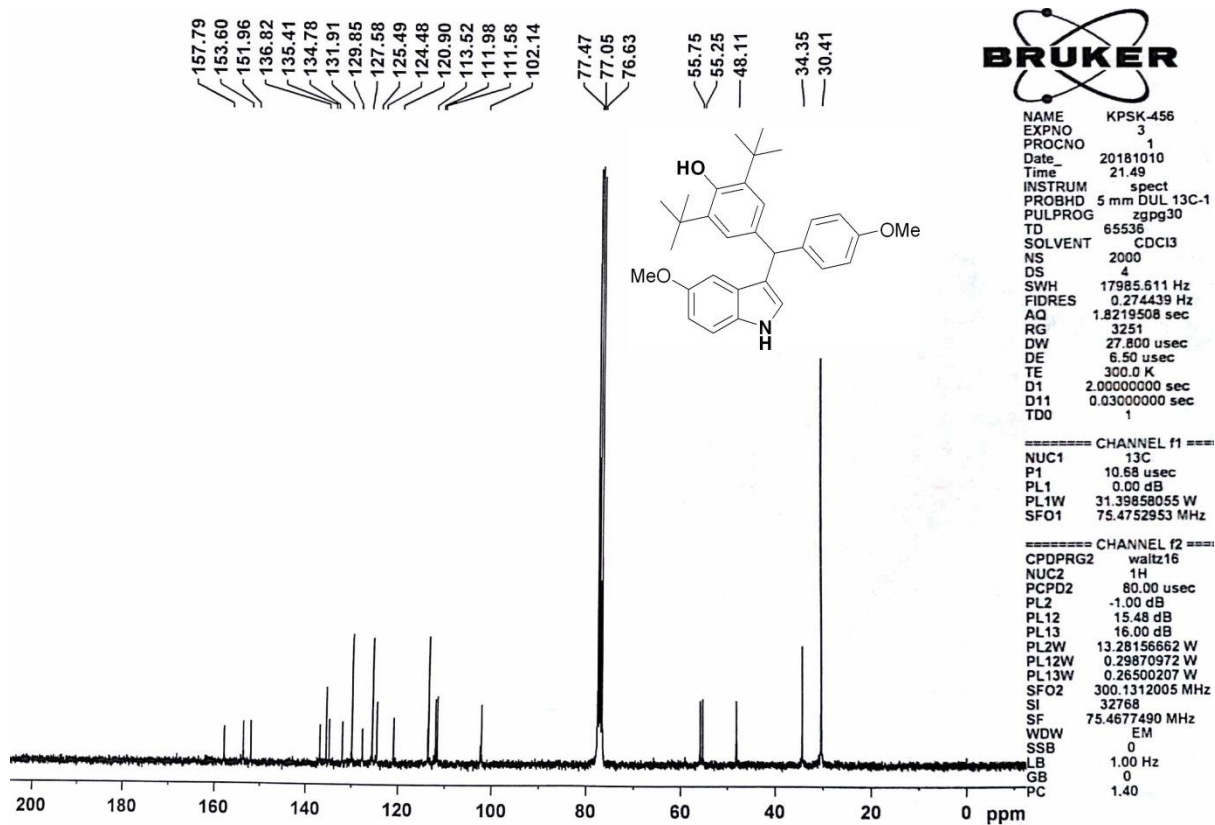

$^1\text{H}$  and  $^{13}\text{C}$  NMR for compound **30**

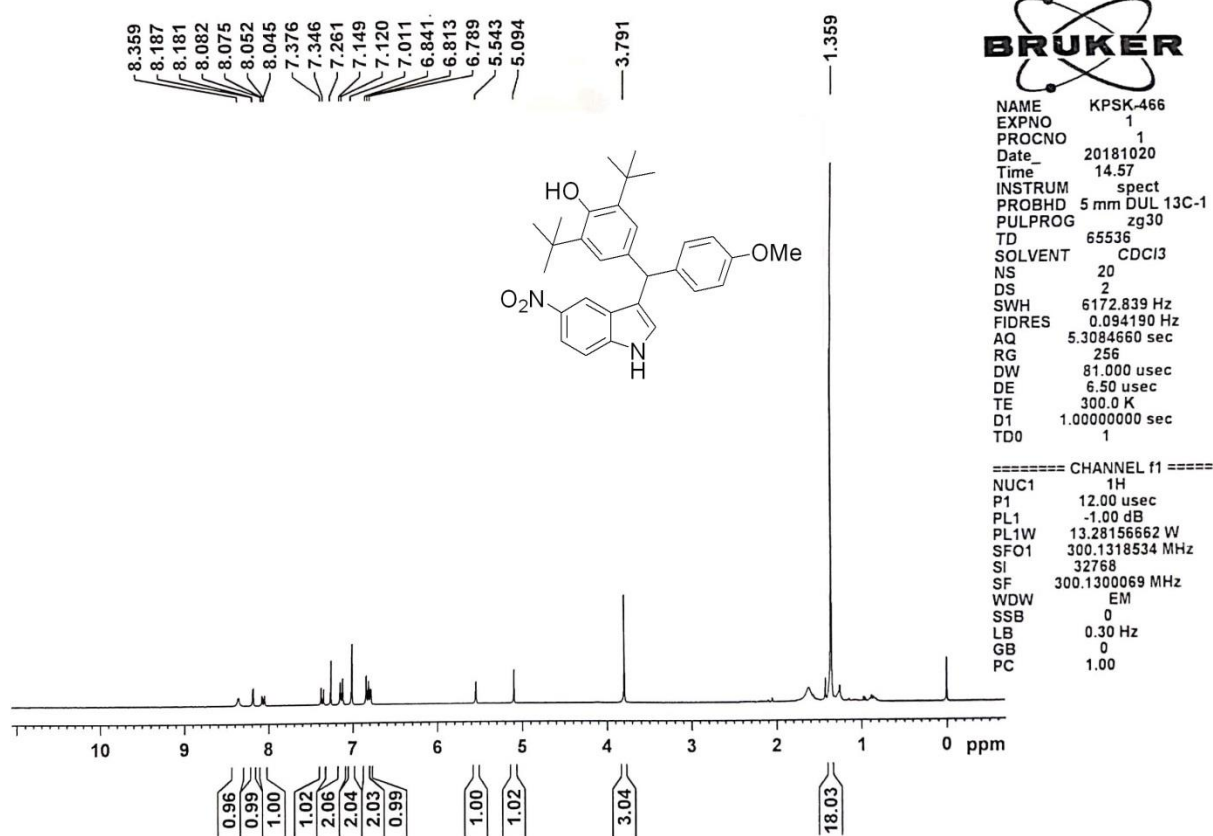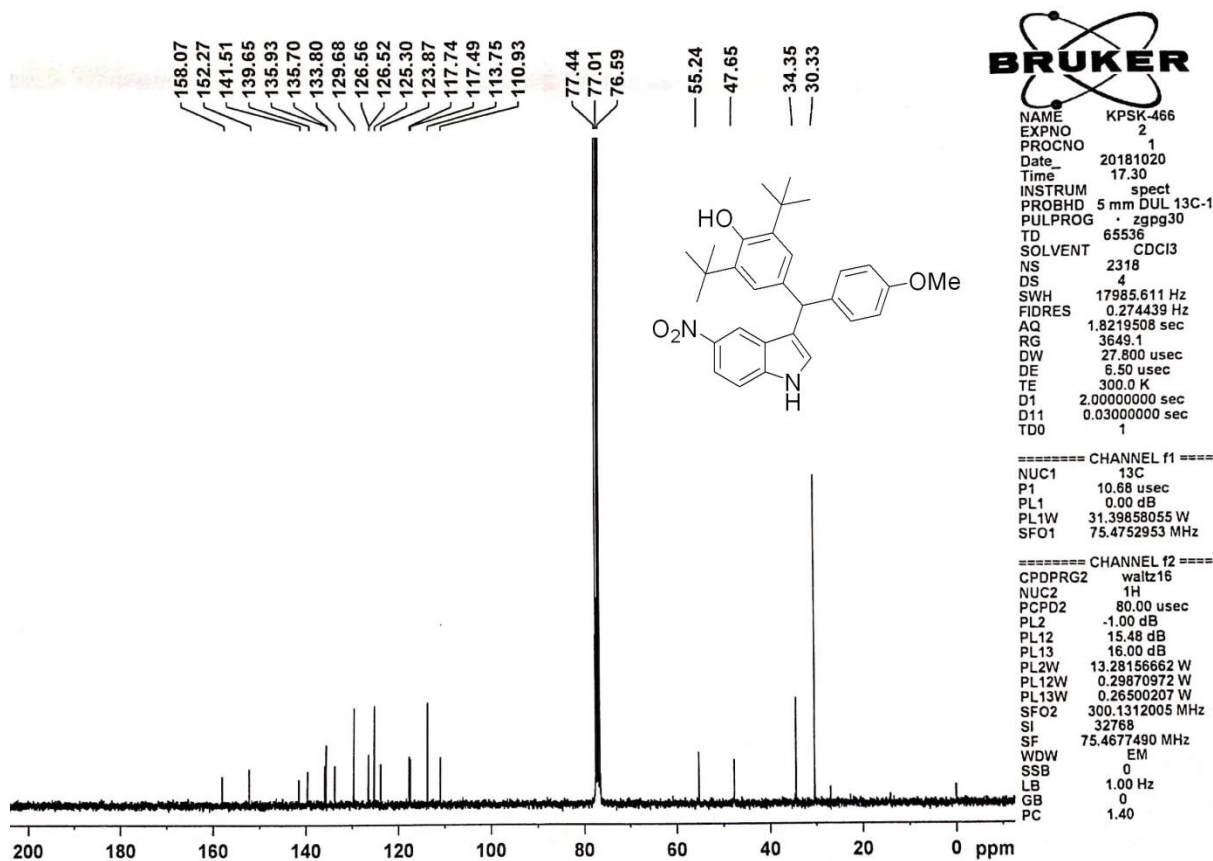

$^1\text{H}$  and  $^{13}\text{C}$  NMR for compound **3p**

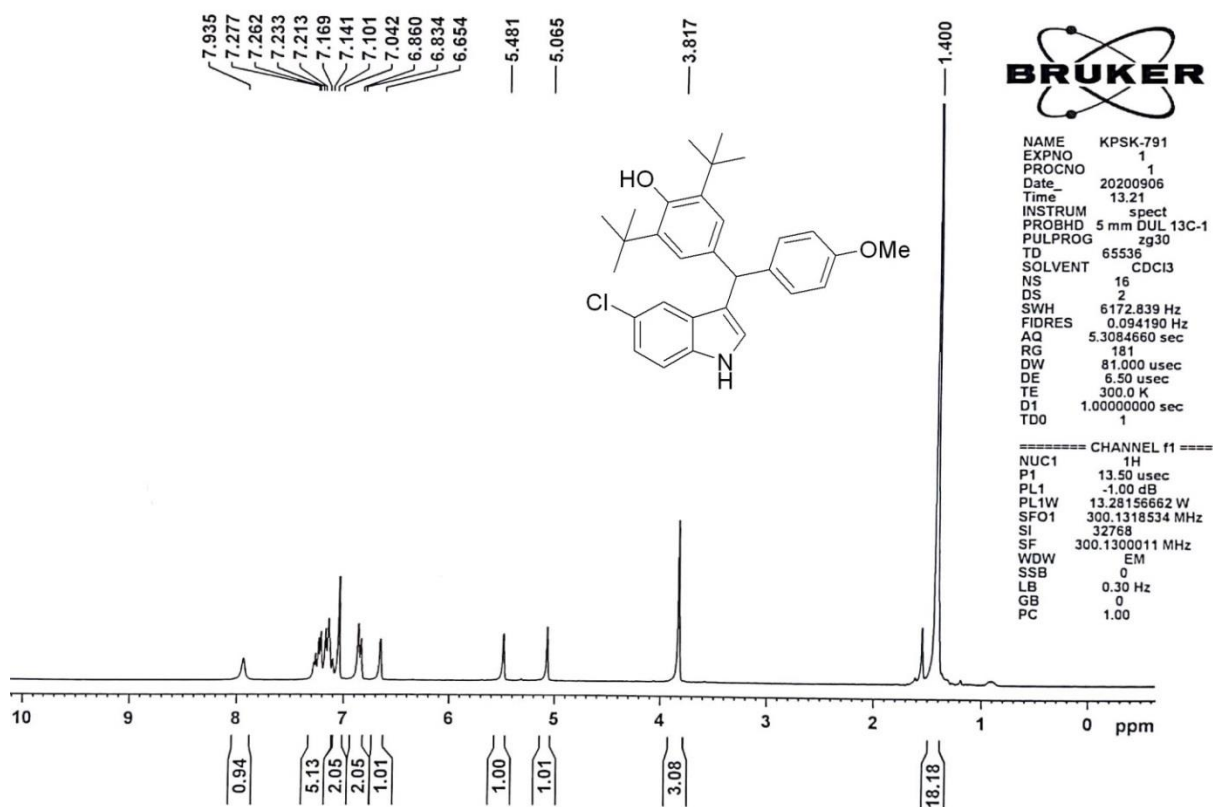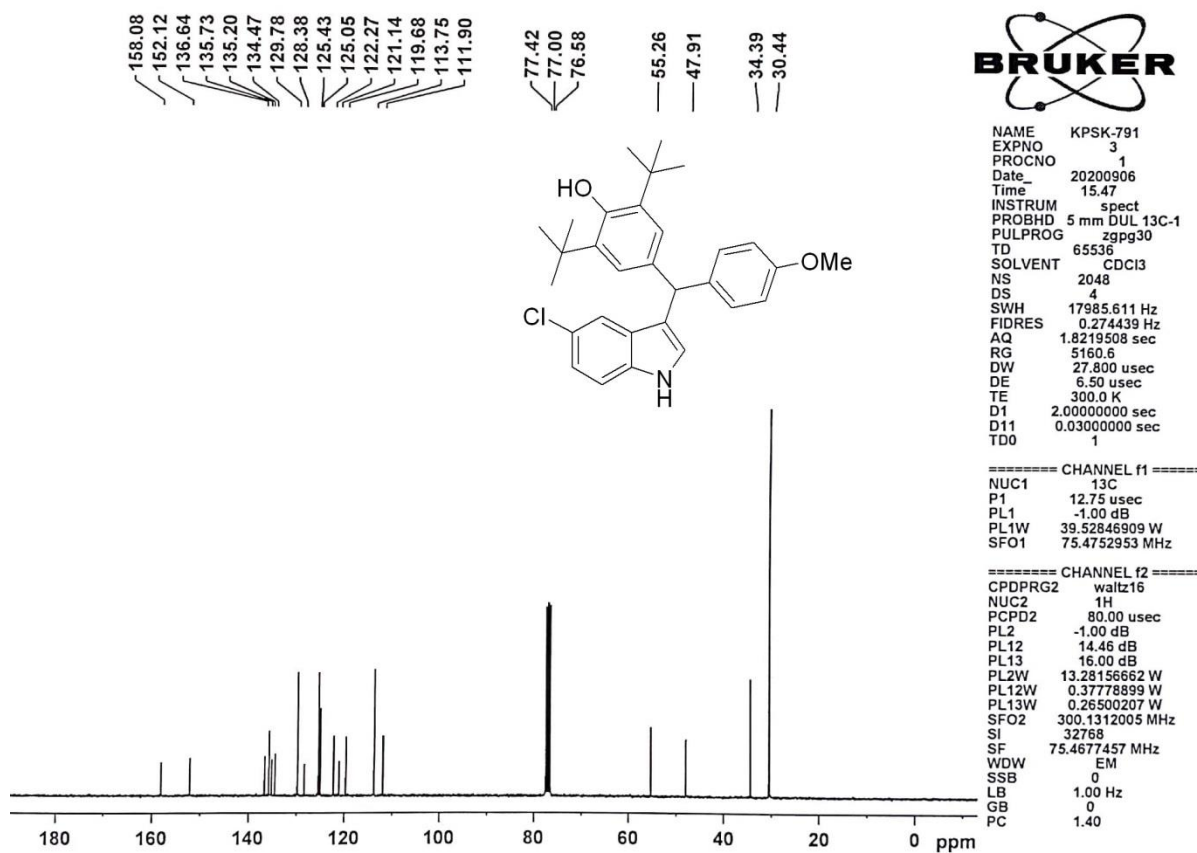

$^1\text{H}$  and  $^{13}\text{C}$  NMR for compound **3q**

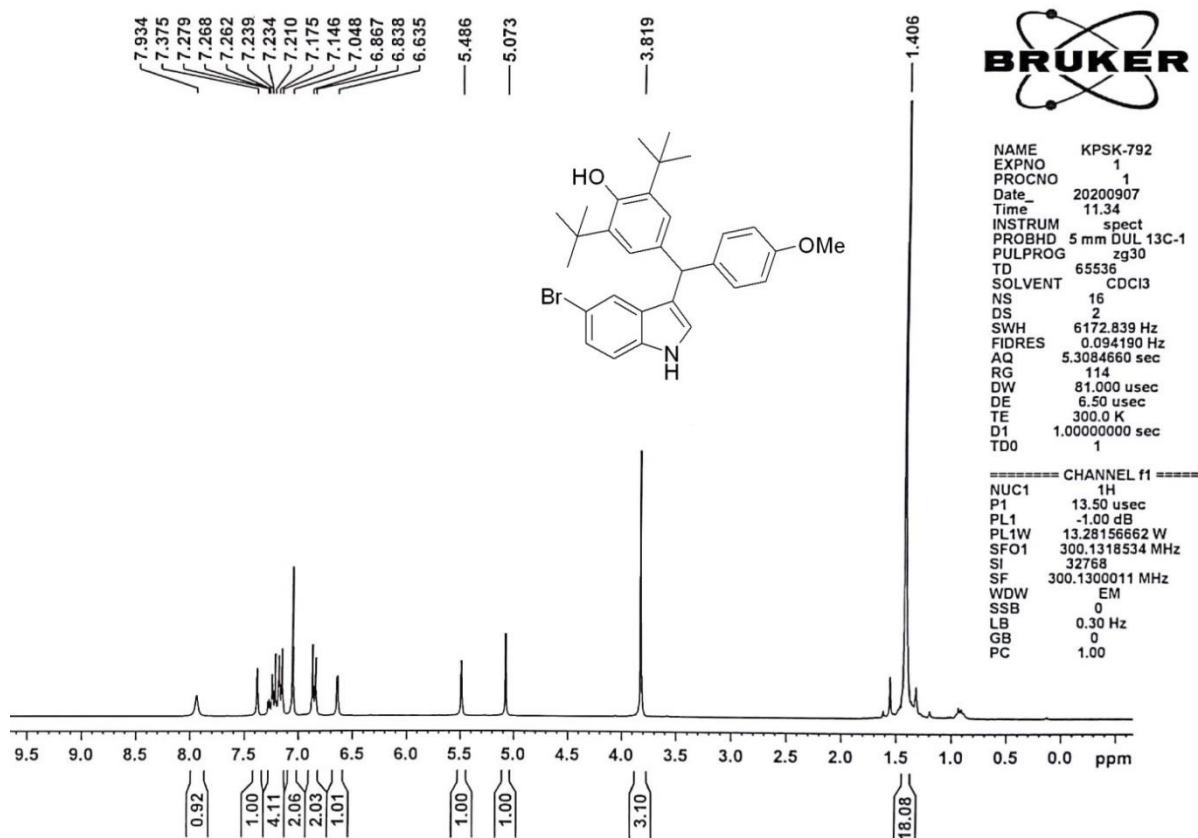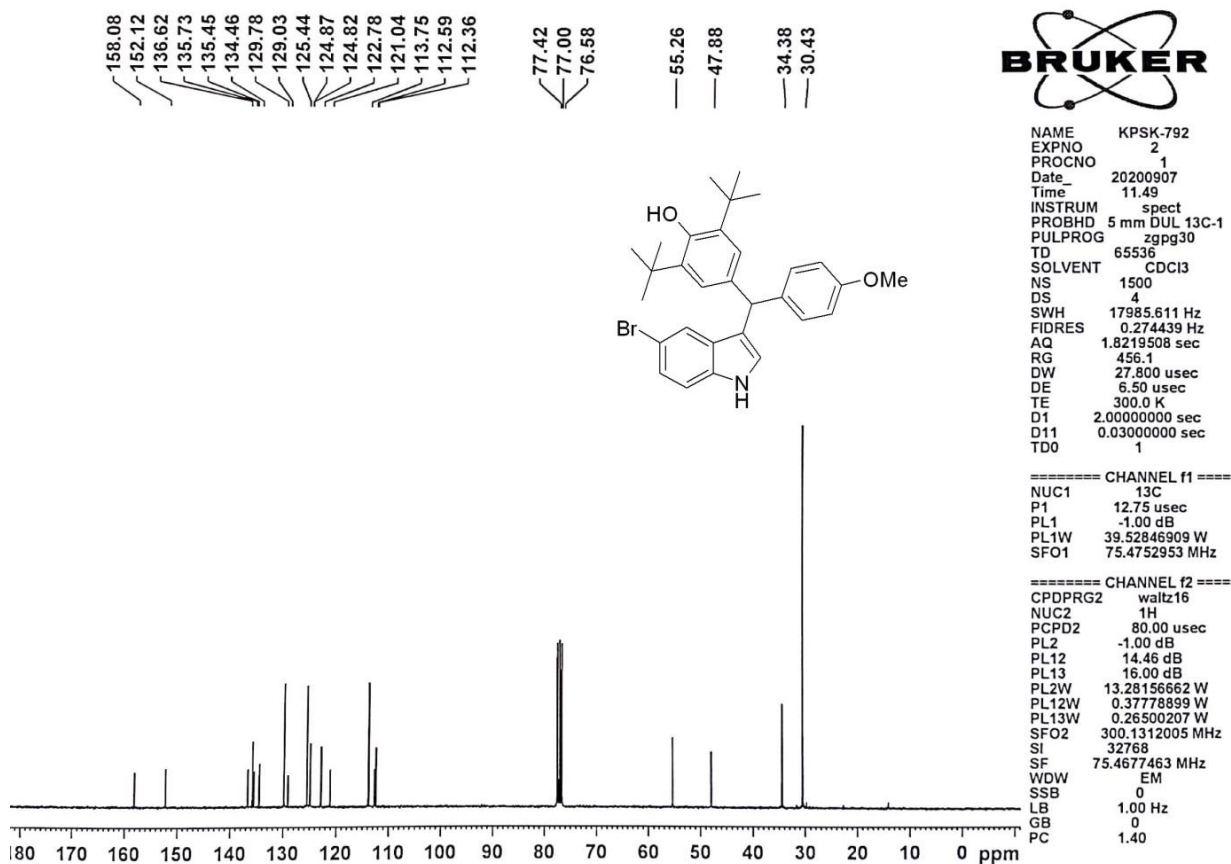

$^1\text{H}$  and  $^{13}\text{C}$  NMR for compound **3r**

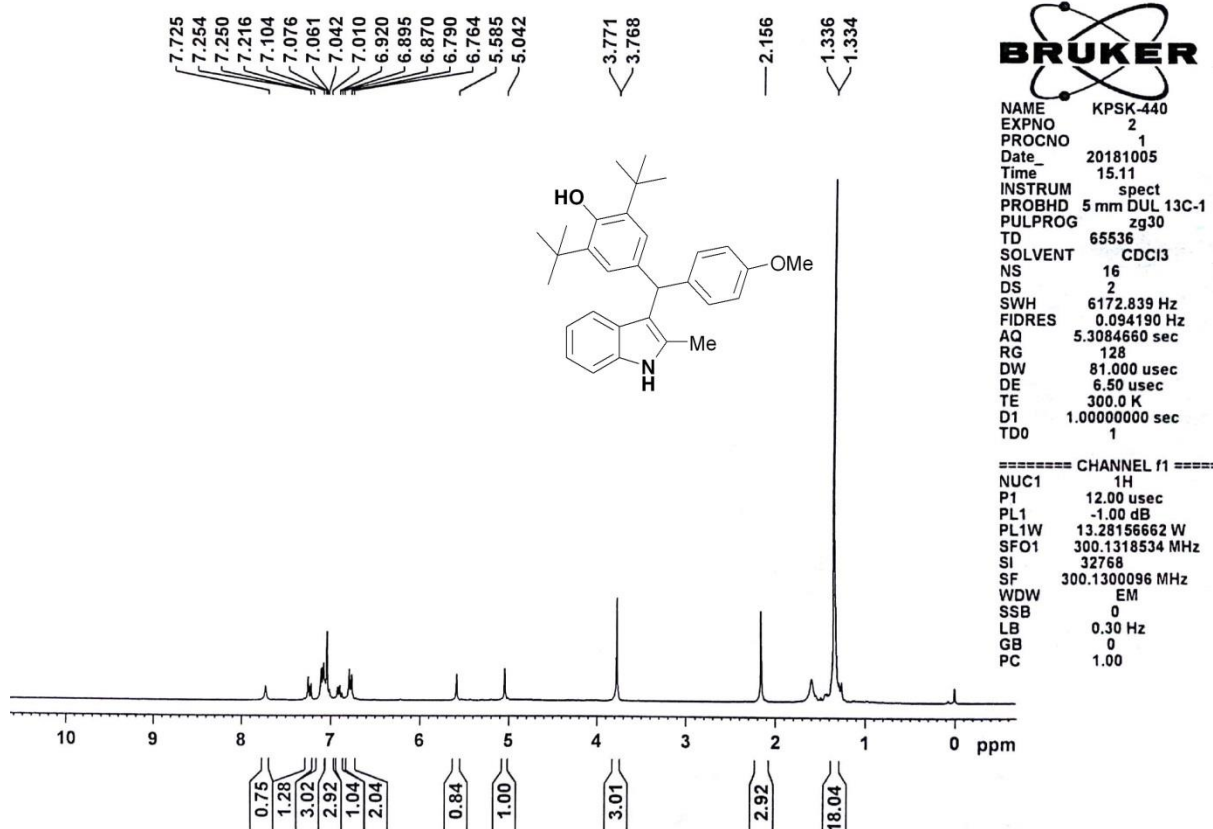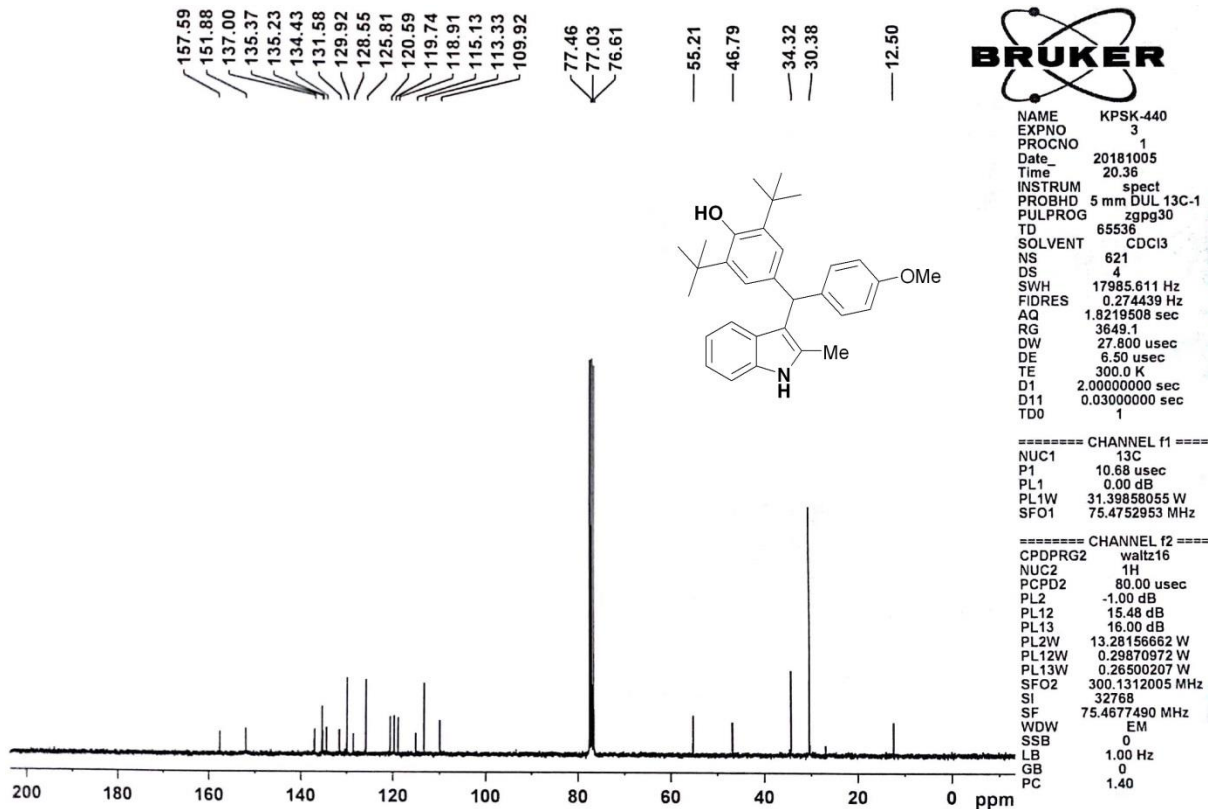



$^1\text{H}$  and  $^{13}\text{C}$  NMR for compound **3s**

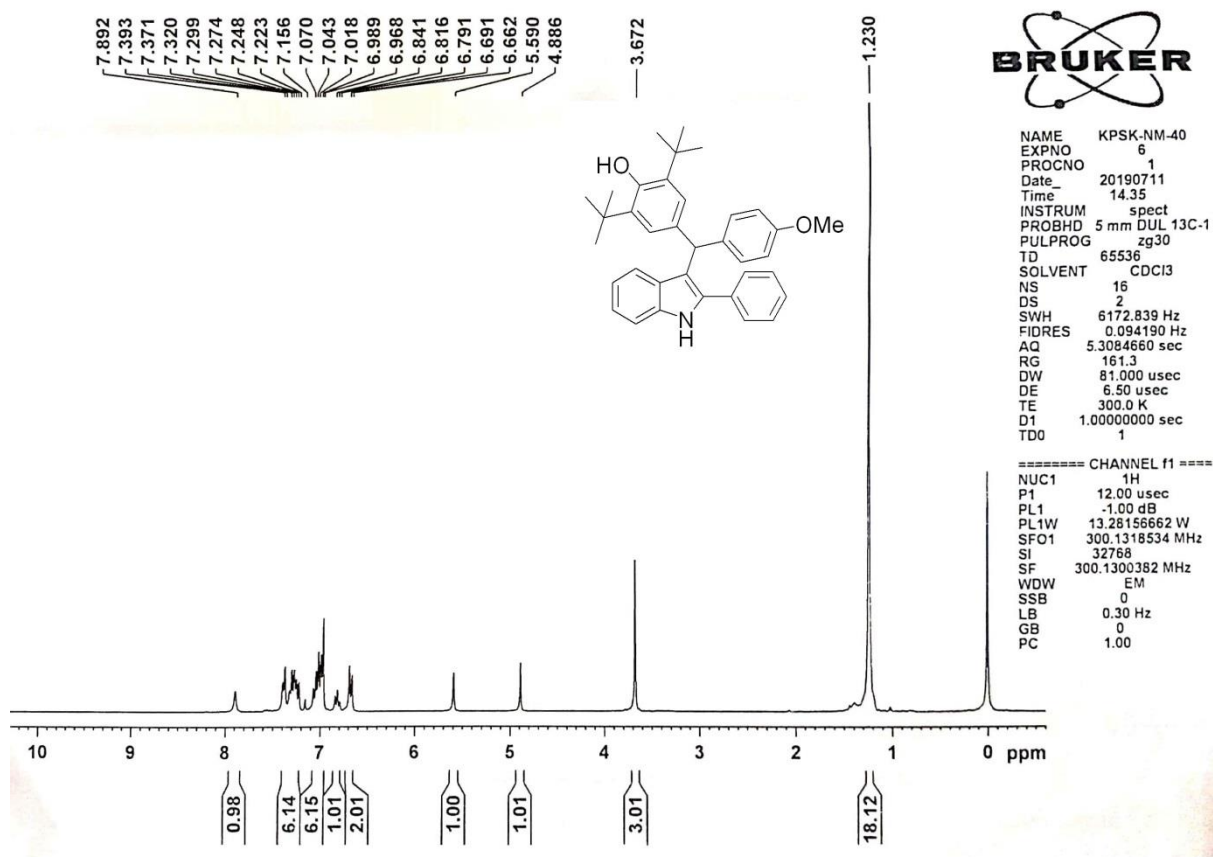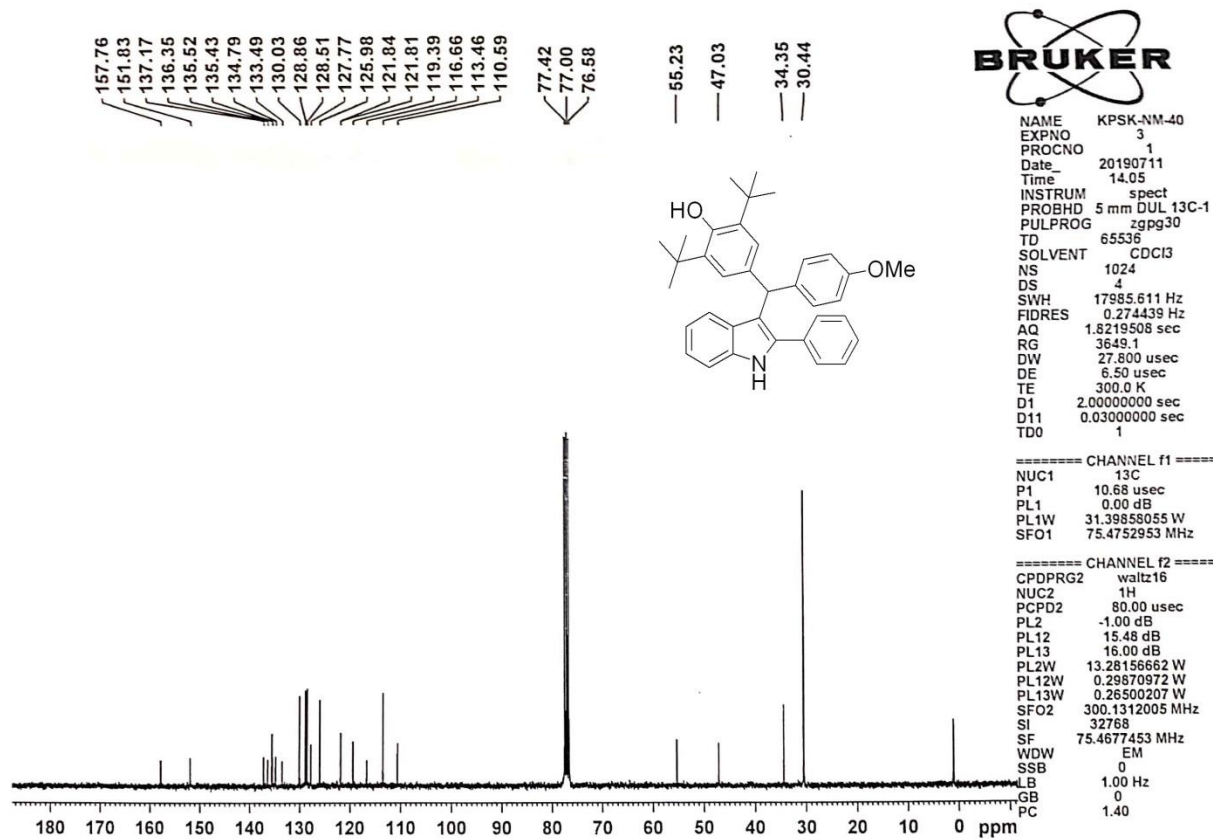

$^1\text{H}$  and  $^{13}\text{C}$  NMR for compound **3u**

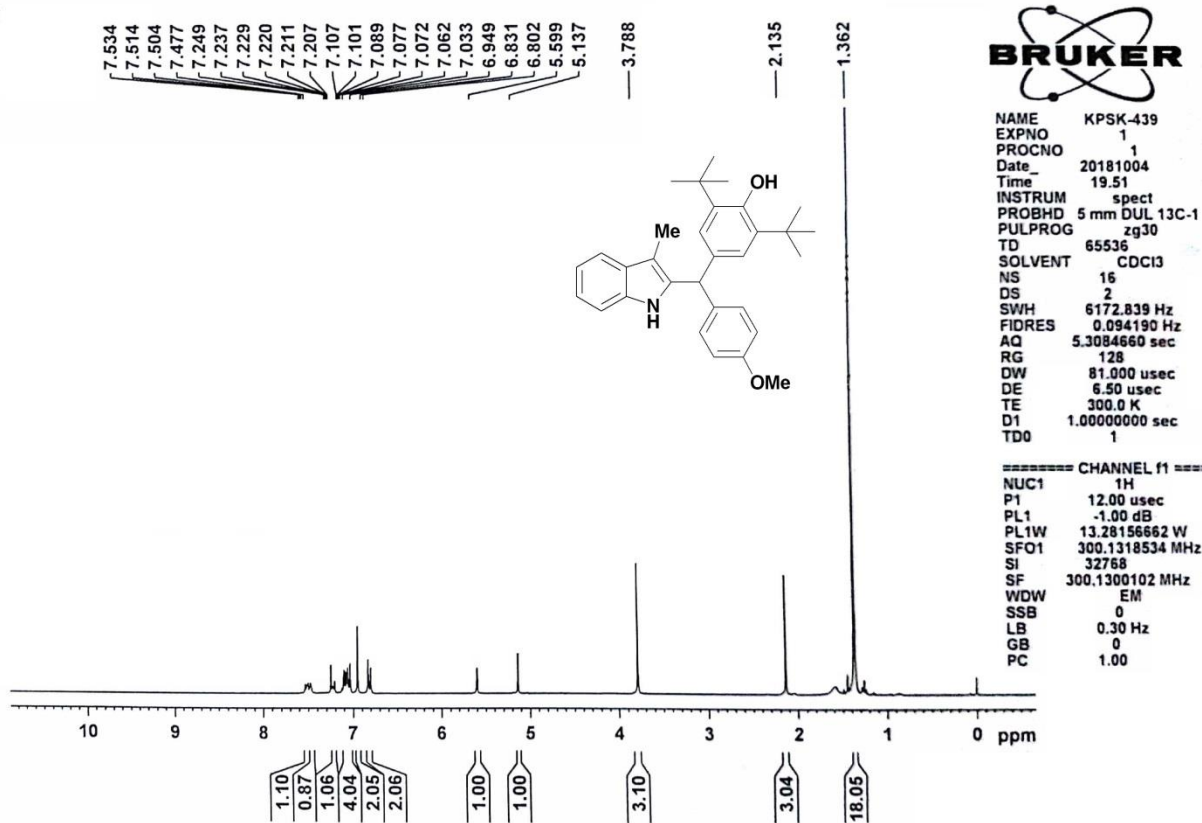

V. OF MADRAS

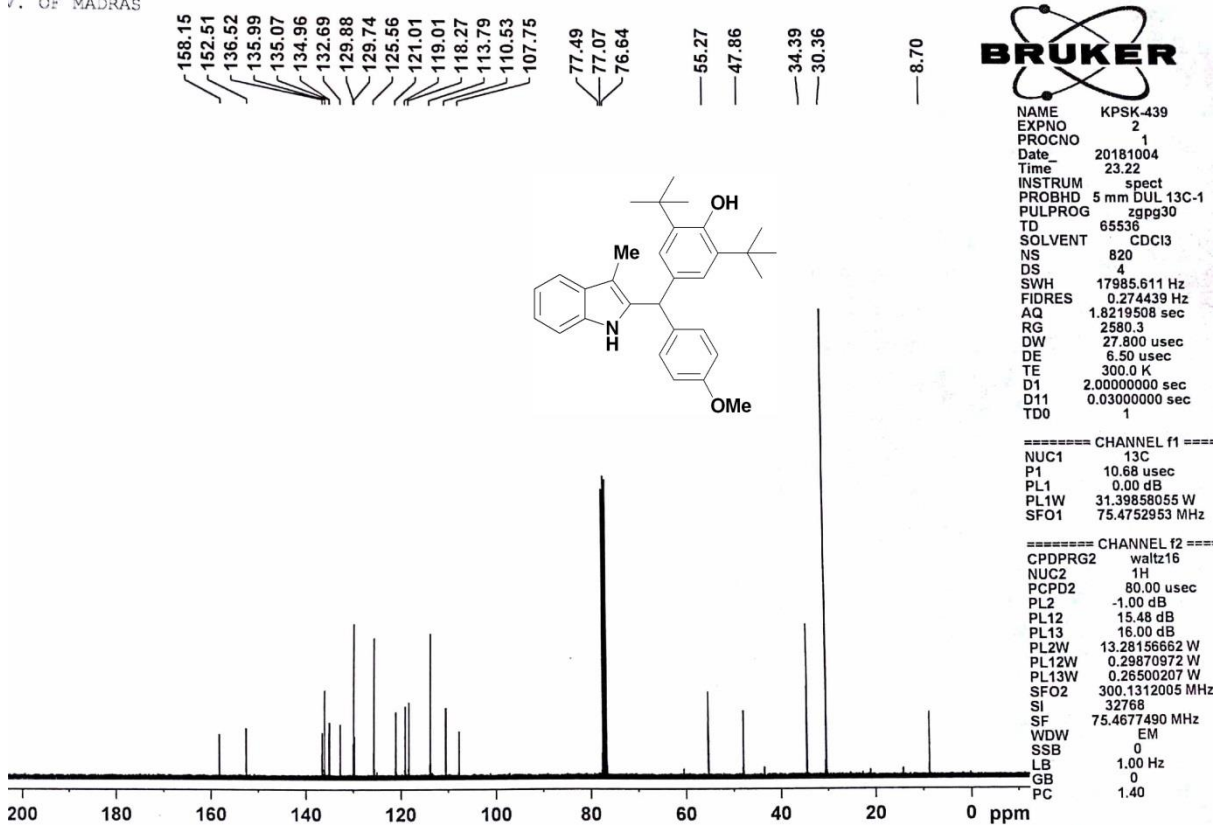

$^1\text{H}$  and  $^{13}\text{C}$  NMR for compound **3v**

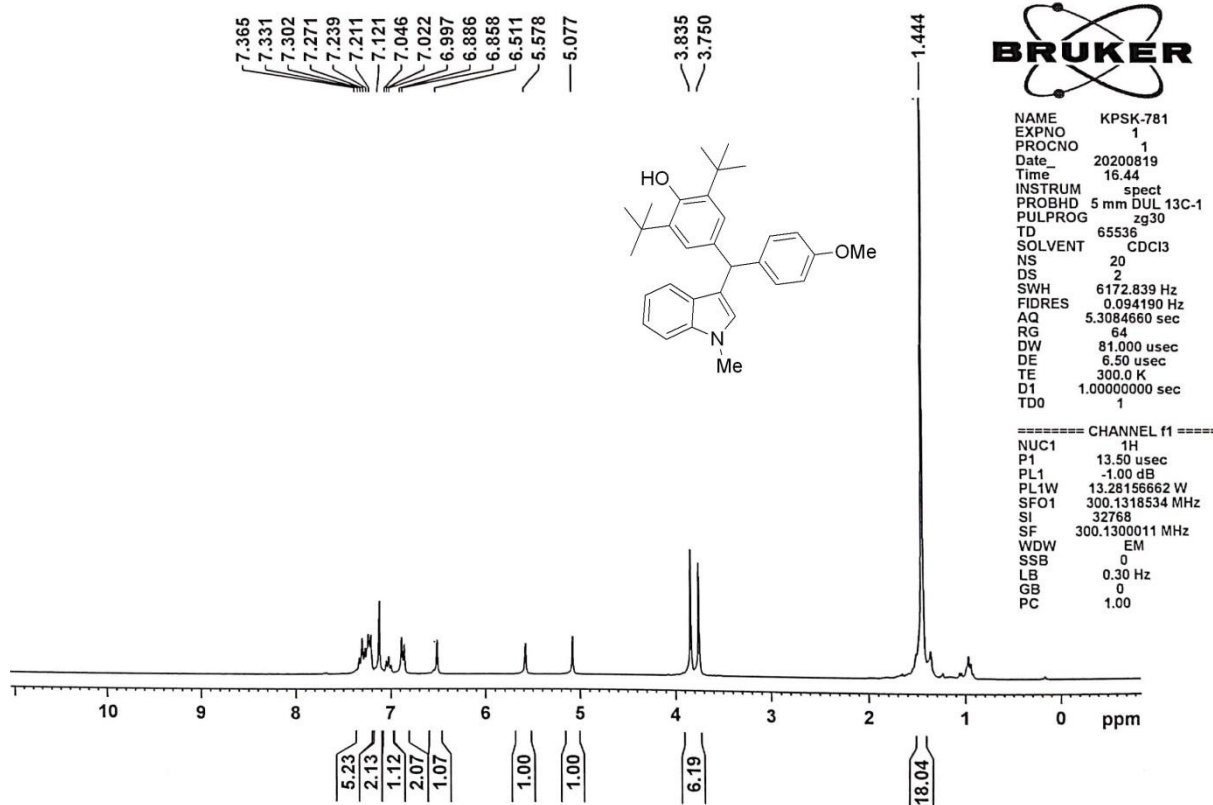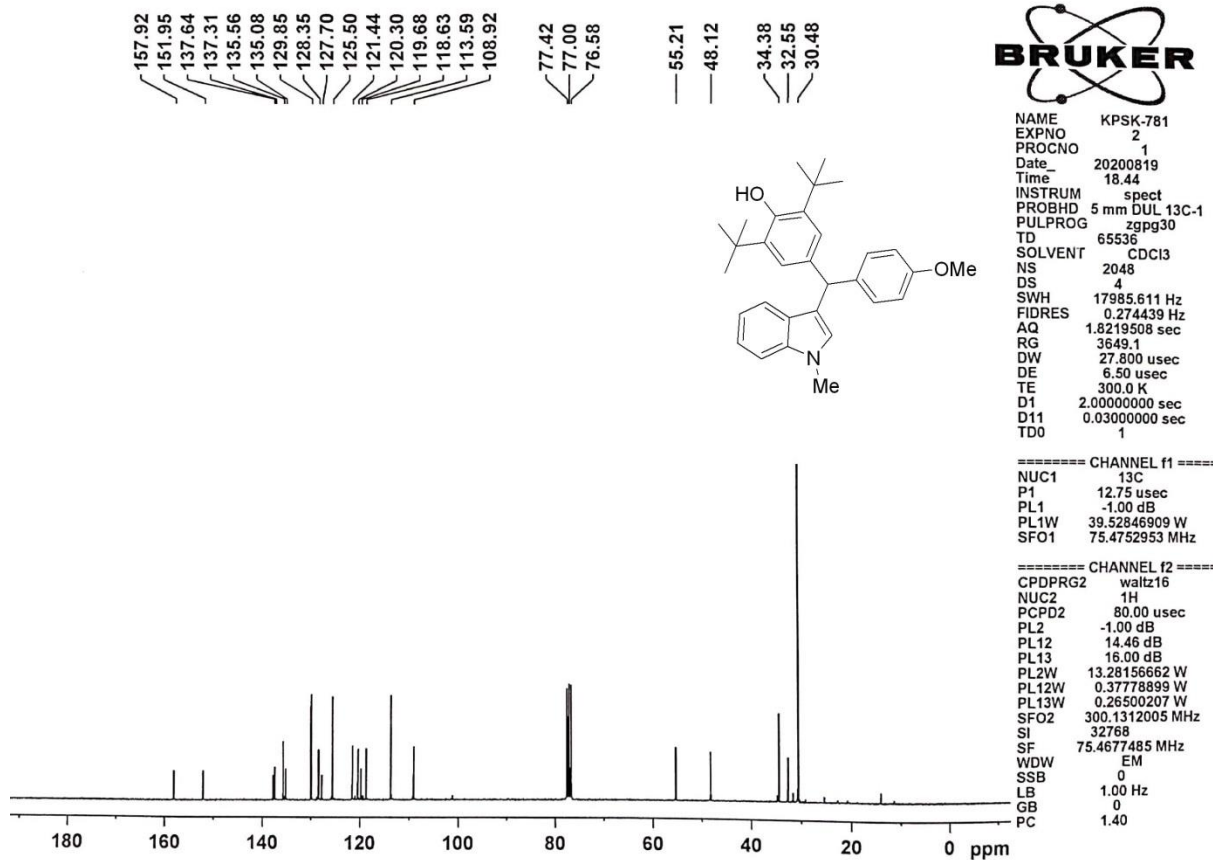

$^1\text{H}$  and  $^{13}\text{C}$  NMR for compound **3w**

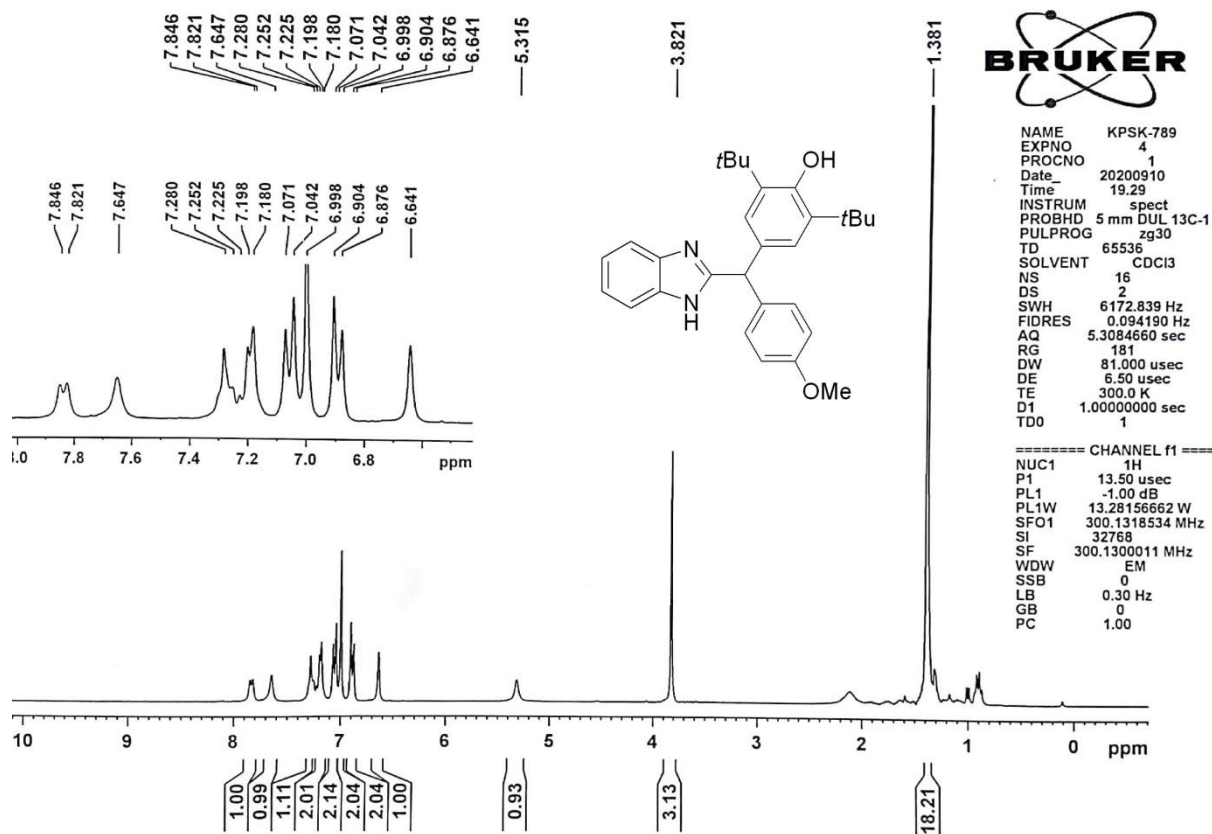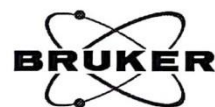

NAME KPSK-789  
 EXPNO 4  
 PROCNO 1  
 Date\_ 20200910  
 Time\_ 19.29  
 INSTRUM spect  
 PROBHD 5 mm DUL 13C-1  
 PULPROG zg30  
 TD 65536  
 SOLVENT CDCl3  
 NS 16  
 DS 2  
 SWH 6172.839 Hz  
 FIDRES 0.094190 Hz  
 AQ 5.3084660 sec  
 RG 181  
 DW 81.000 usec  
 DE 6.50 usec  
 TE 300.0 K  
 D1 1.00000000 sec  
 TD0 1

===== CHANNEL f1 =====  
 NUC1  $^1\text{H}$   
 P1 13.50 usec  
 PL1 -1.00 dB  
 PL1W 13.28156662 W  
 SFO1 300.1318534 MHz  
 SI 32768  
 SF 300.1300011 MHz  
 WDW EM  
 SSB 0  
 LB 0.30 Hz  
 GB 0  
 PC 1.00

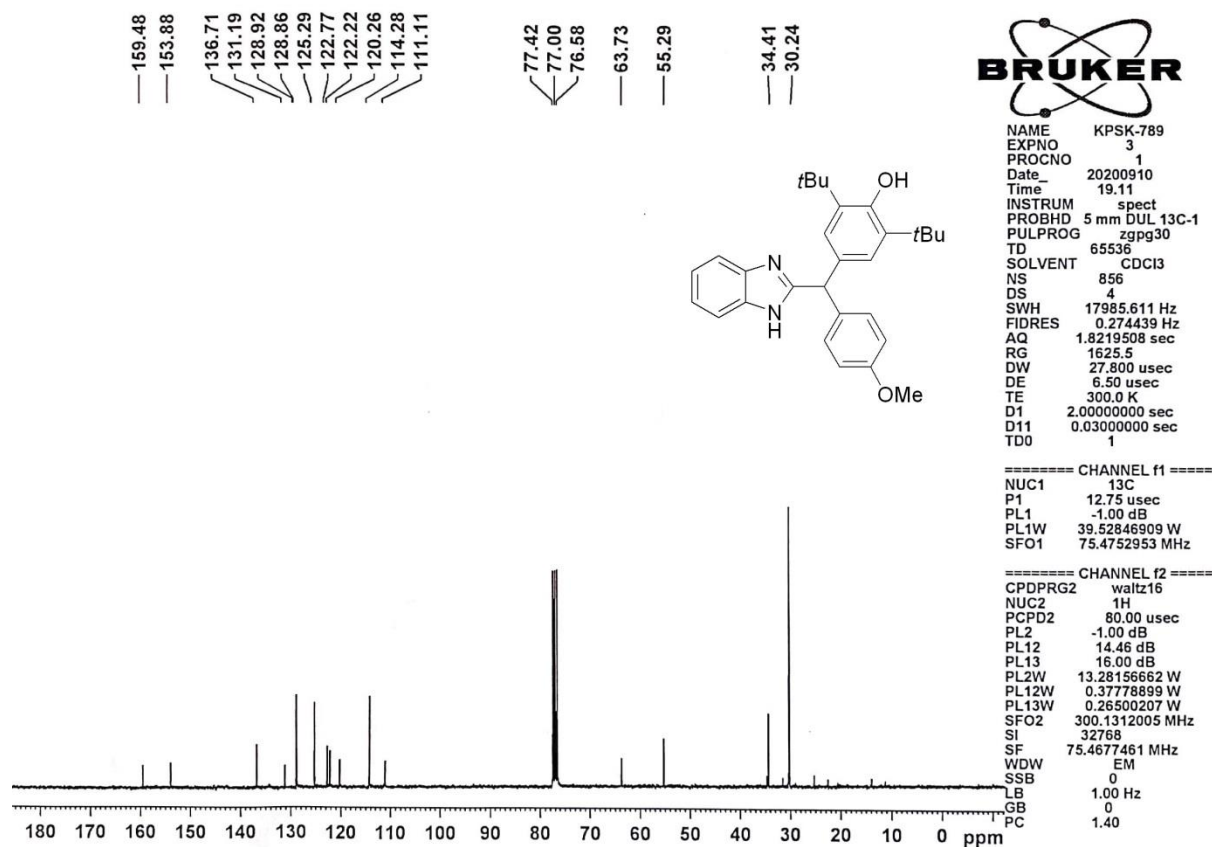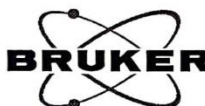

NAME KPSK-789  
 EXPNO 3  
 PROCNO 1  
 Date\_ 20200910  
 Time\_ 19.11  
 INSTRUM spect  
 PROBHD 5 mm DUL 13C-1  
 PULPROG zgpg30  
 TD 65536  
 SOLVENT CDCl3  
 NS 856  
 DS 4  
 SWH 17985.611 Hz  
 FIDRES 0.274439 Hz  
 AQ 1.8219508 sec  
 RG 1625.5  
 DW 27.800 usec  
 DE 6.50 usec  
 TE 300.0 K  
 D1 2.00000000 sec  
 D11 0.03000000 sec  
 TD0 1

===== CHANNEL f1 =====  
 NUC1  $^{13}\text{C}$   
 P1 12.75 usec  
 PL1 -1.00 dB  
 PL1W 39.52846909 W  
 SFO1 75.4752953 MHz

===== CHANNEL f2 =====  
 CPDPRG2 waltz16  
 NUC2  $^1\text{H}$   
 PCPD2 80.00 usec  
 PL2 -1.00 dB  
 PL12 14.46 dB  
 PL13 16.00 dB  
 PL2W 13.28156662 W  
 PL12W 0.37778899 W  
 PL13W 0.26500207 W  
 SFO2 300.1312005 MHz  
 SI 32768  
 SF 75.4677461 MHz  
 WDW EM  
 SSB 0  
 LB 1.00 Hz  
 GB 0  
 PC 1.40

<sup>1</sup>H and <sup>13</sup>C NMR for compound **3x**

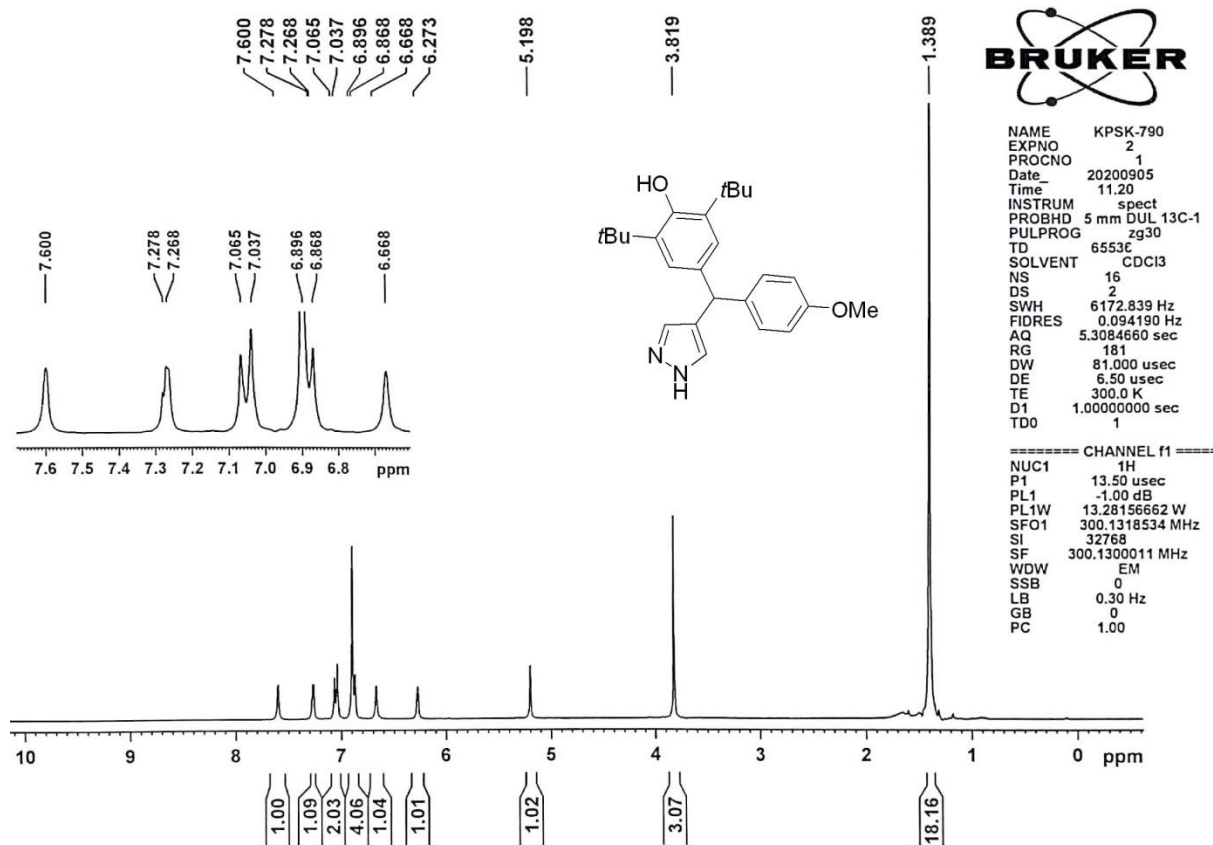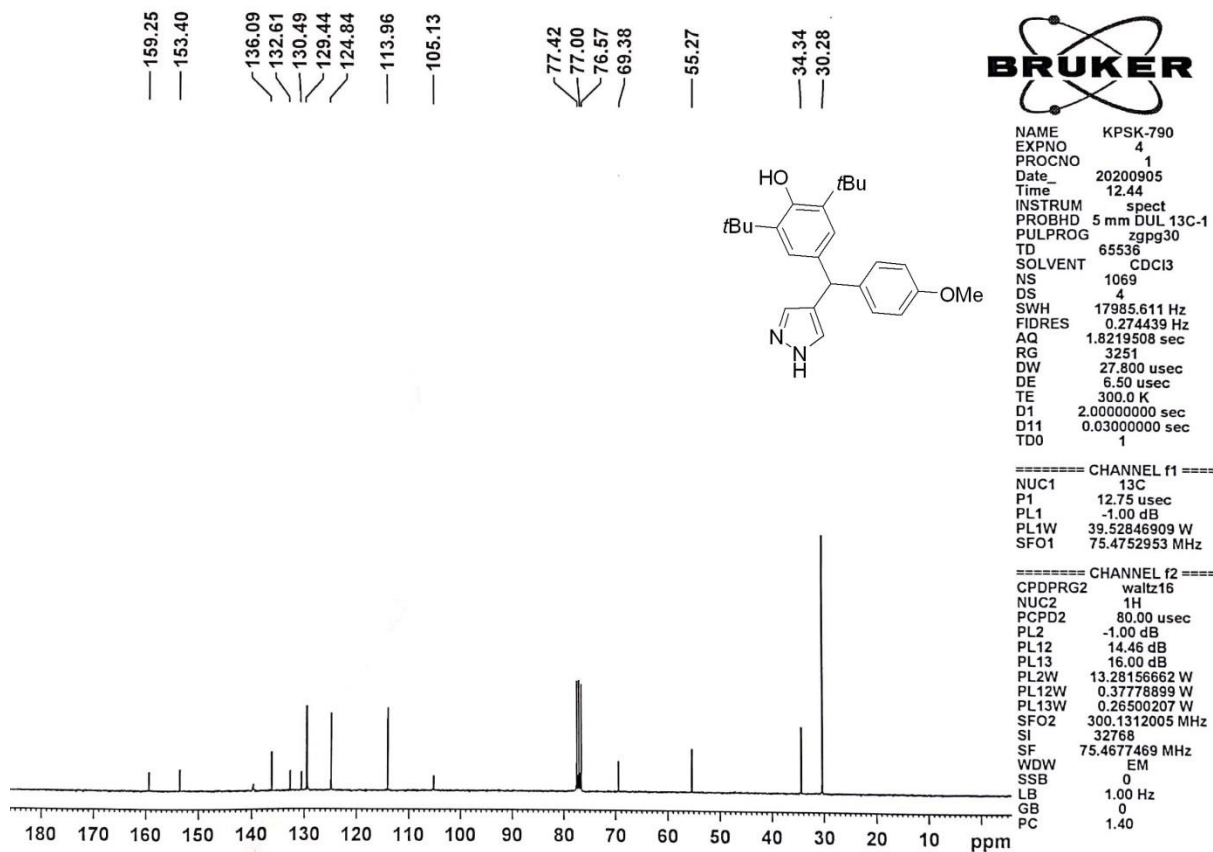

$^1\text{H}$  and  $^{13}\text{C}$  NMR for compound **5a**

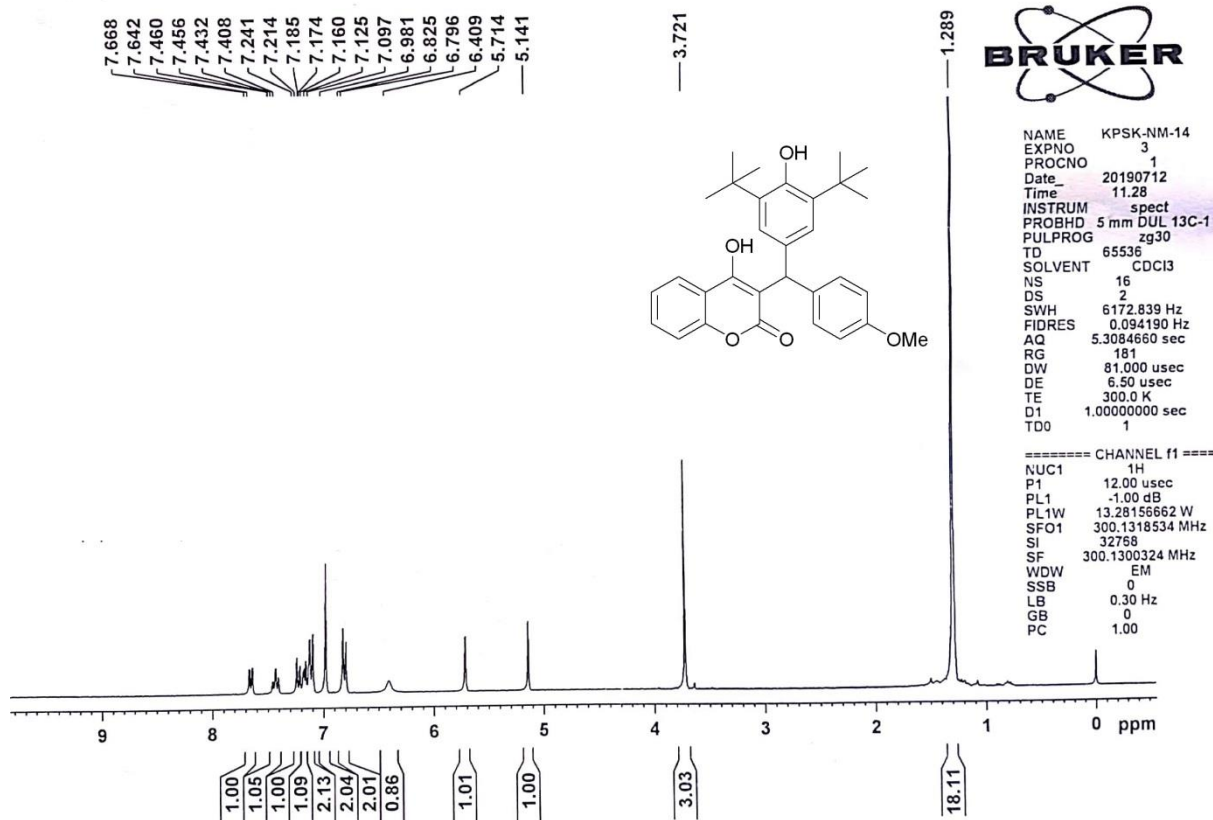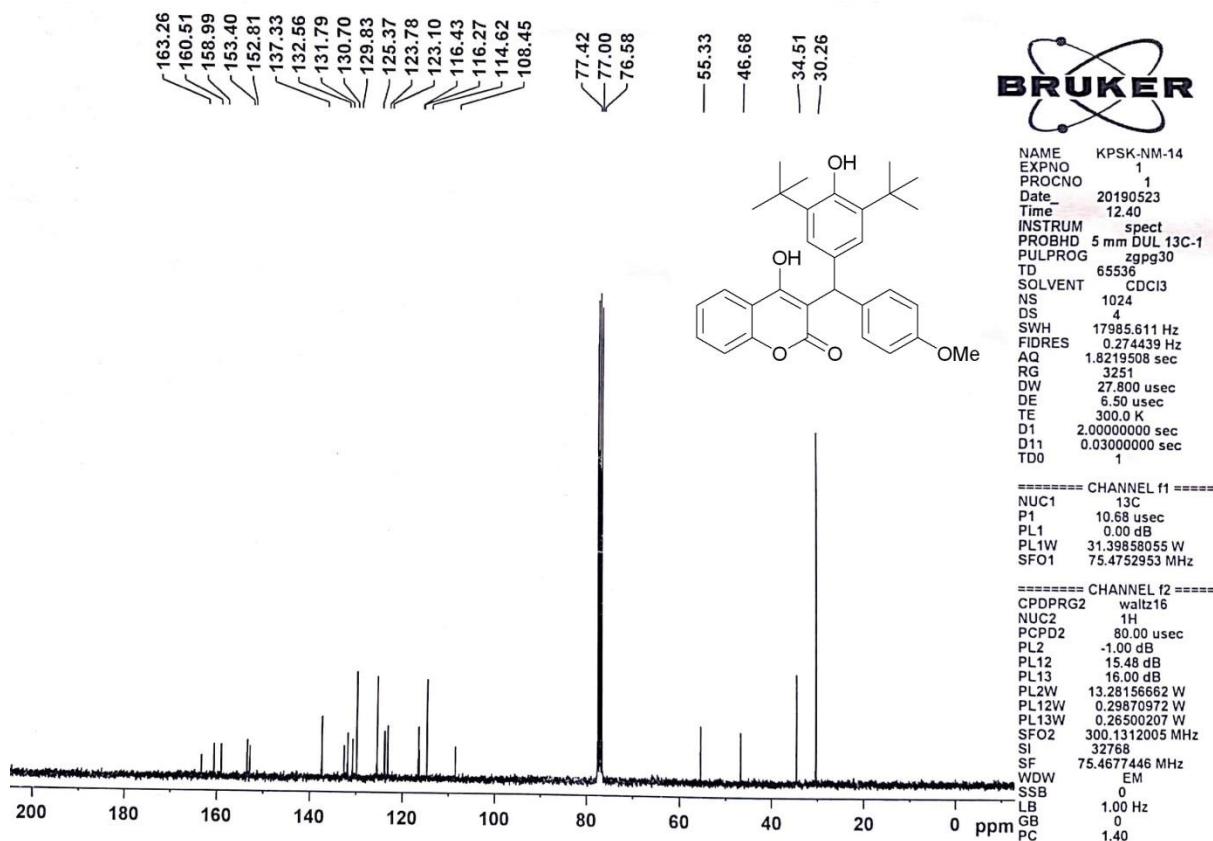

$^1\text{H}$  and  $^{13}\text{C}$  NMR for compound **5b**

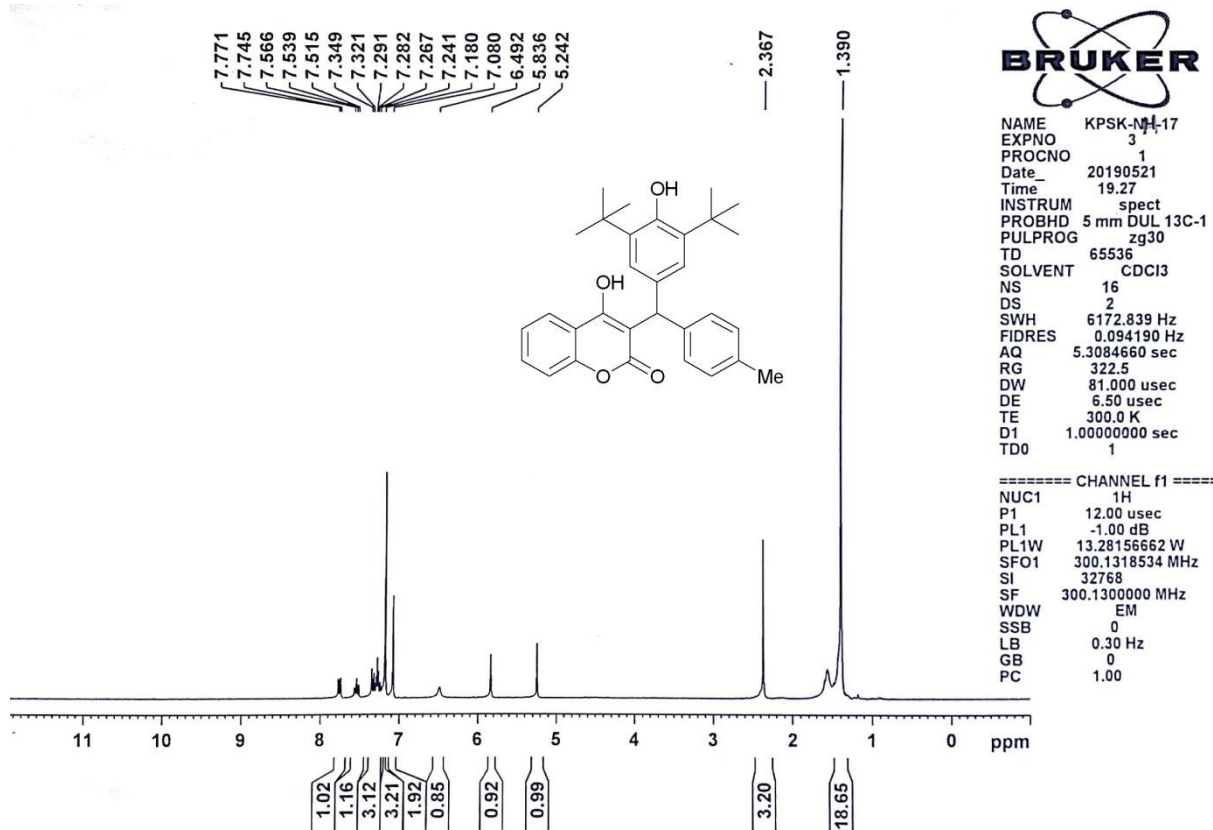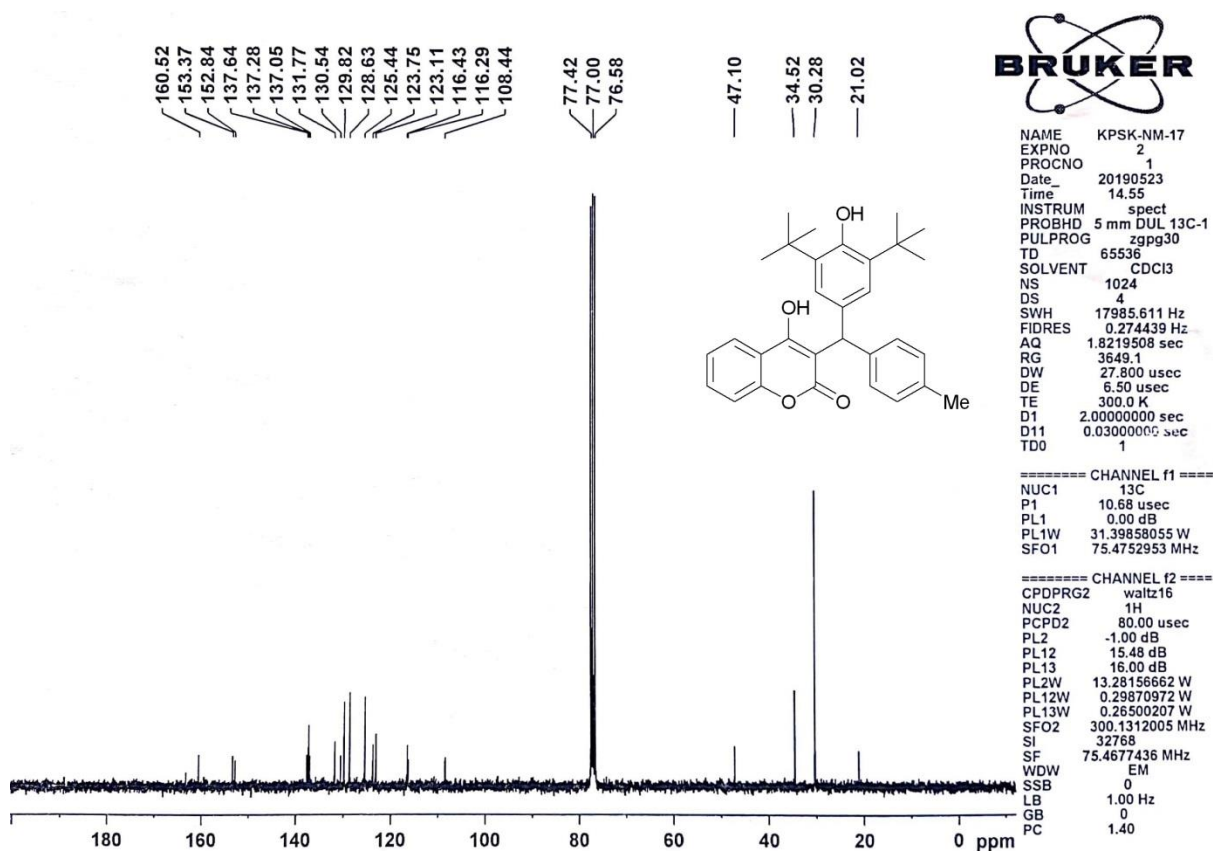

$^1\text{H}$  and  $^{13}\text{C}$  NMR for compound **5c**

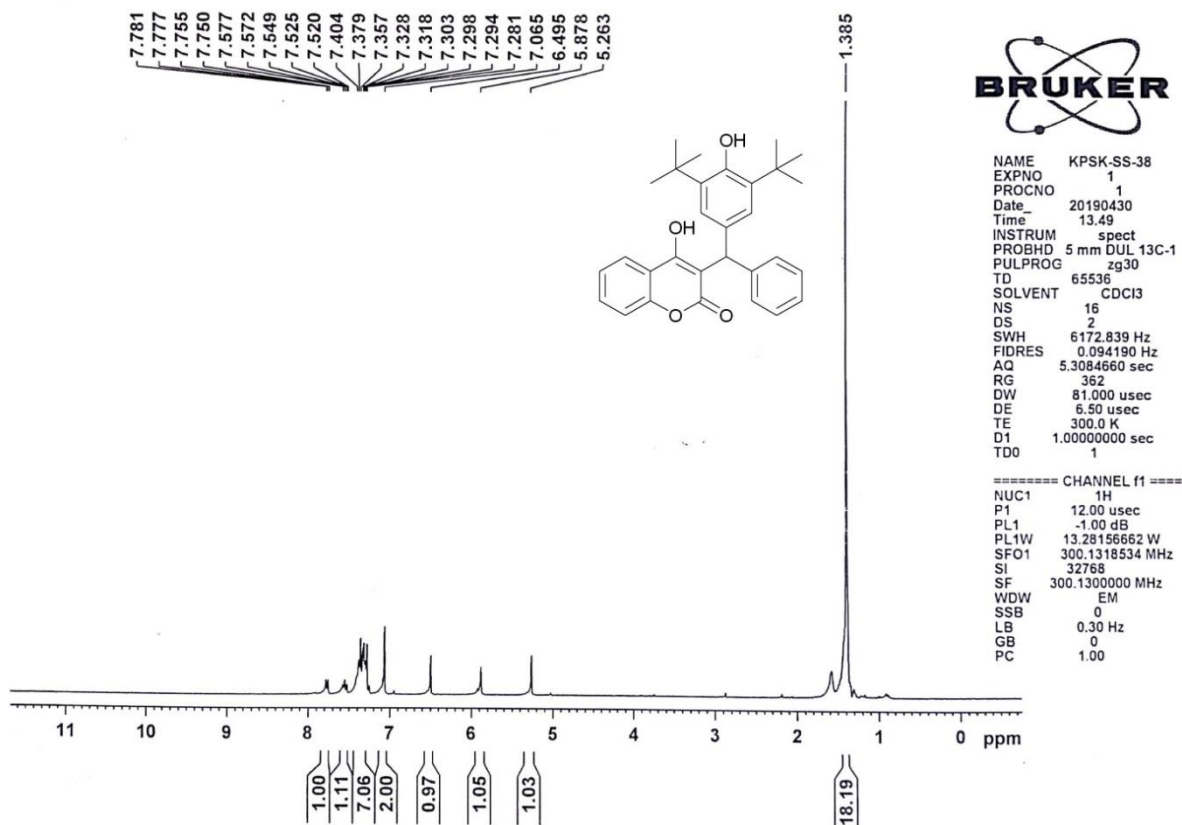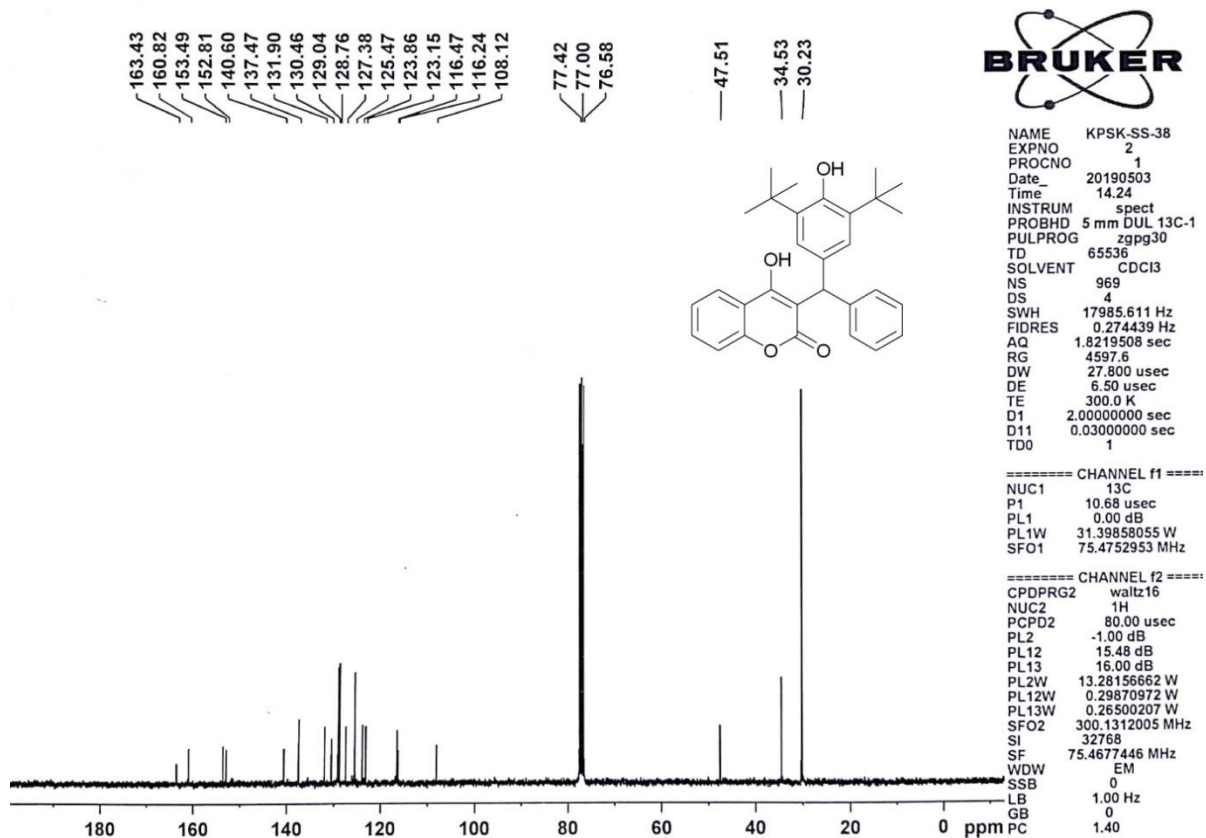



$^1\text{H}$  and  $^{13}\text{C}$  NMR for compound **5d**

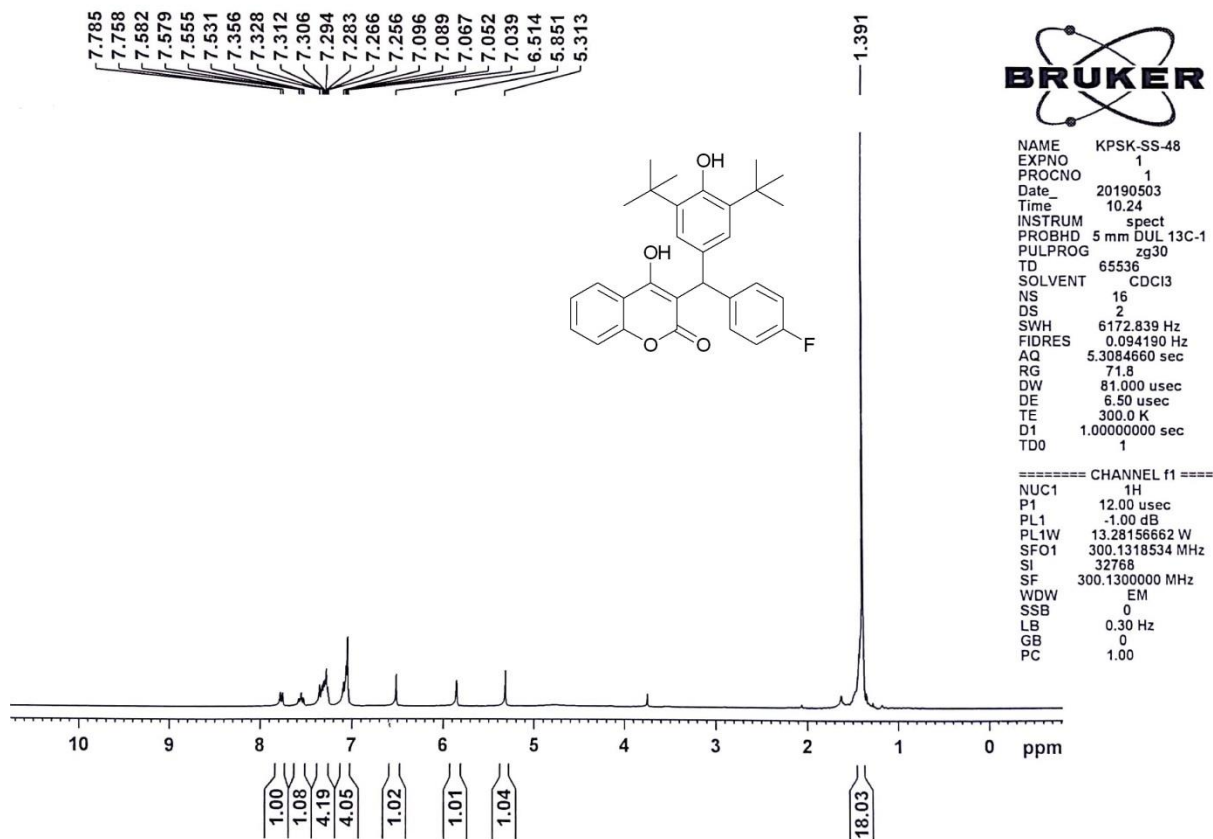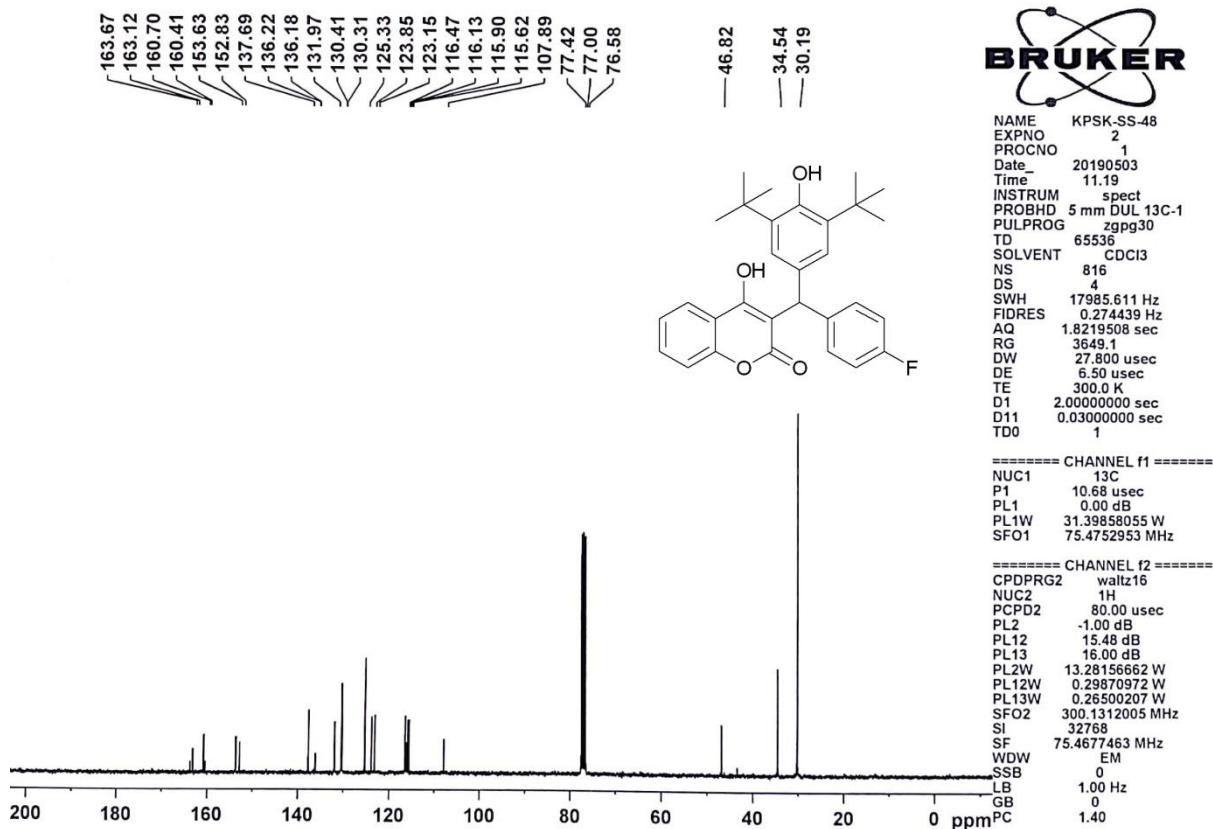

$^1\text{H}$  and  $^{13}\text{C}$  NMR for compound **5e**

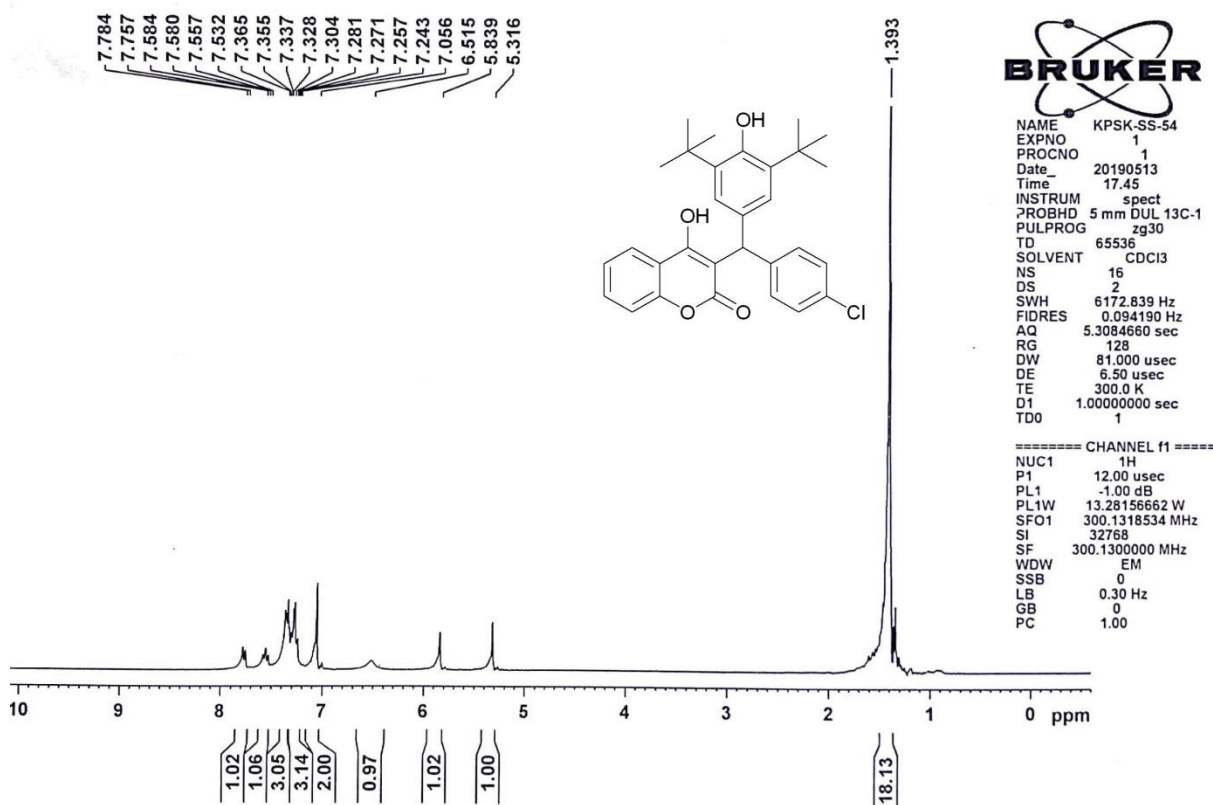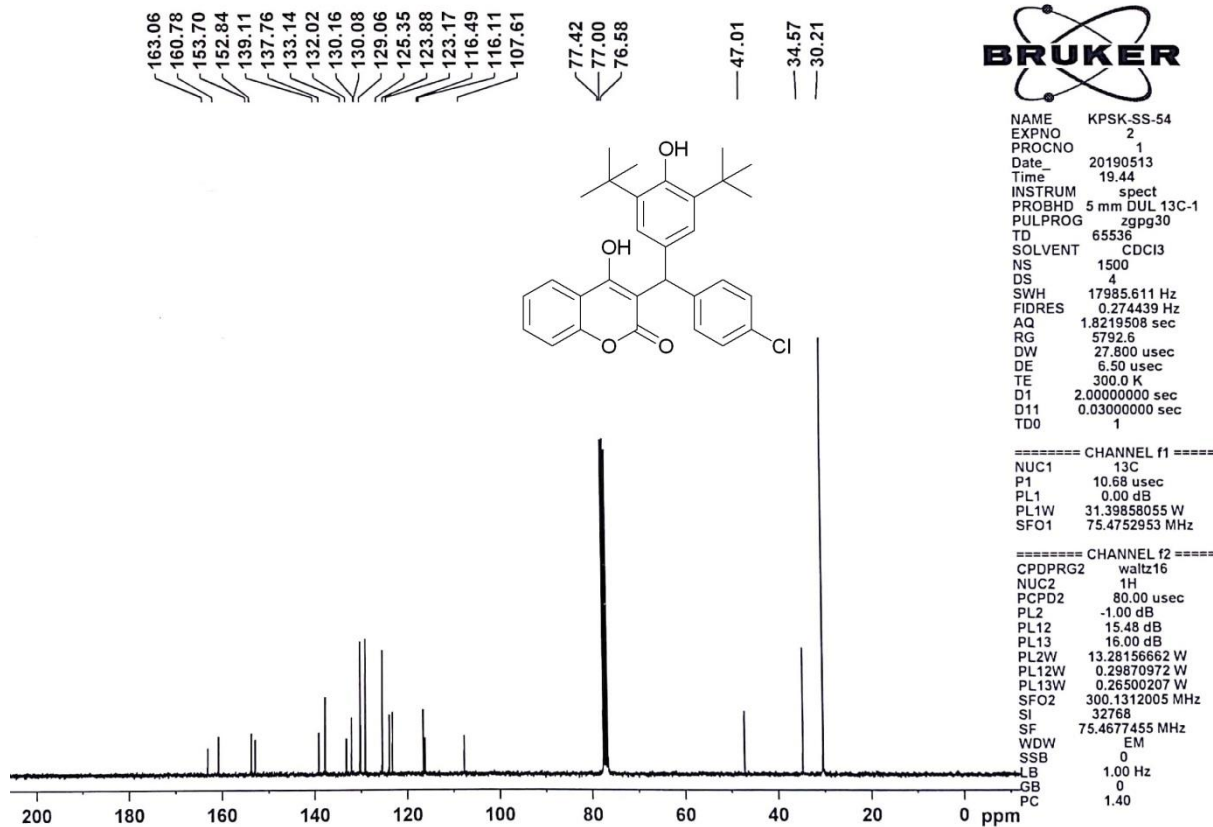

$^1\text{H}$  and  $^{13}\text{C}$  NMR for compound **5f**

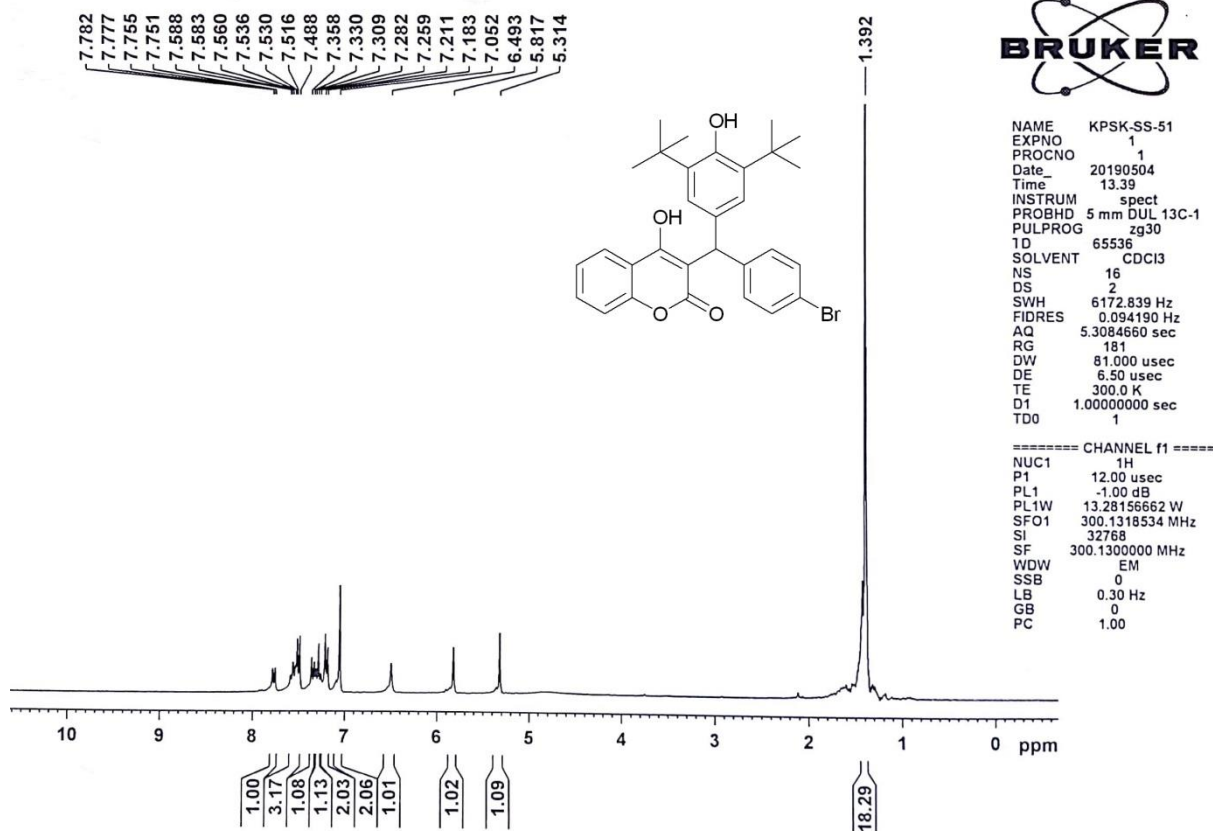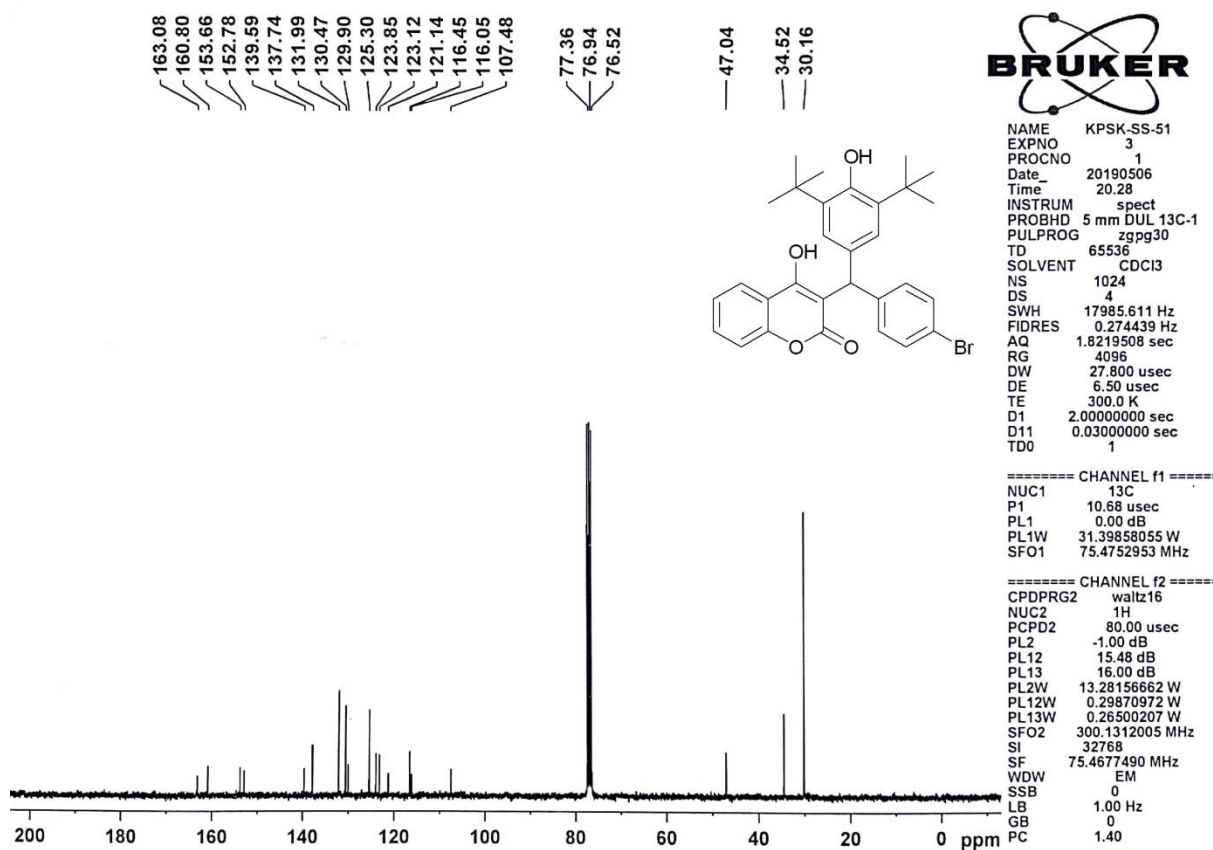

$^1\text{H}$  and  $^{13}\text{C}$  NMR for compound **5g**

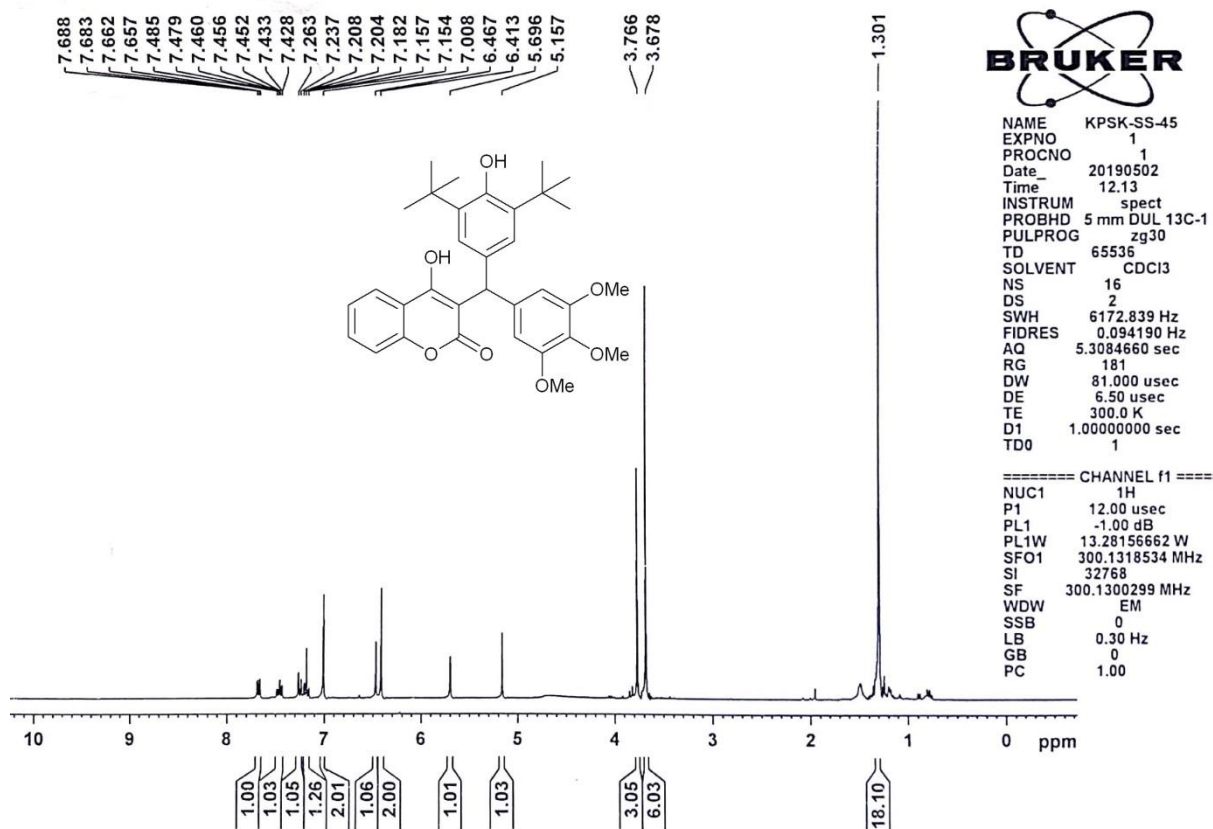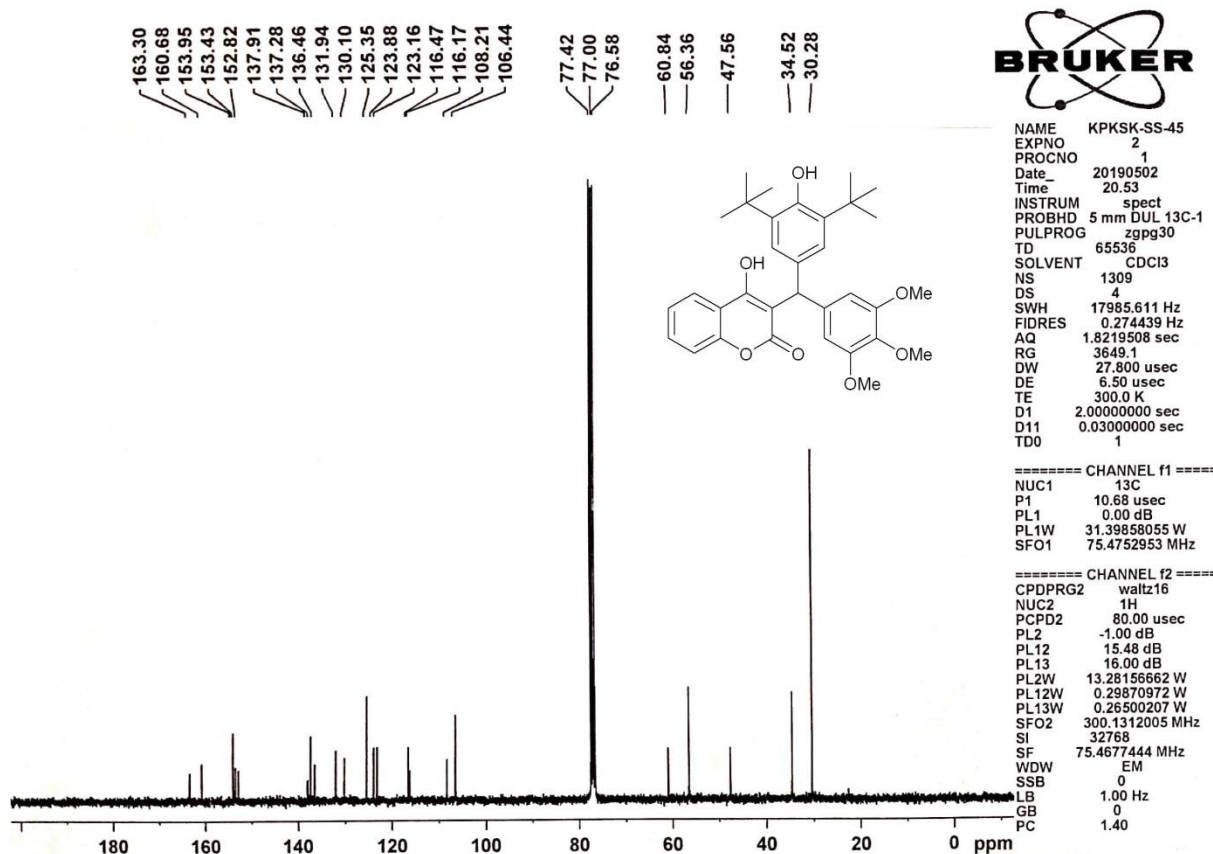

<sup>1</sup>H and <sup>13</sup>C NMR for compound **5h**

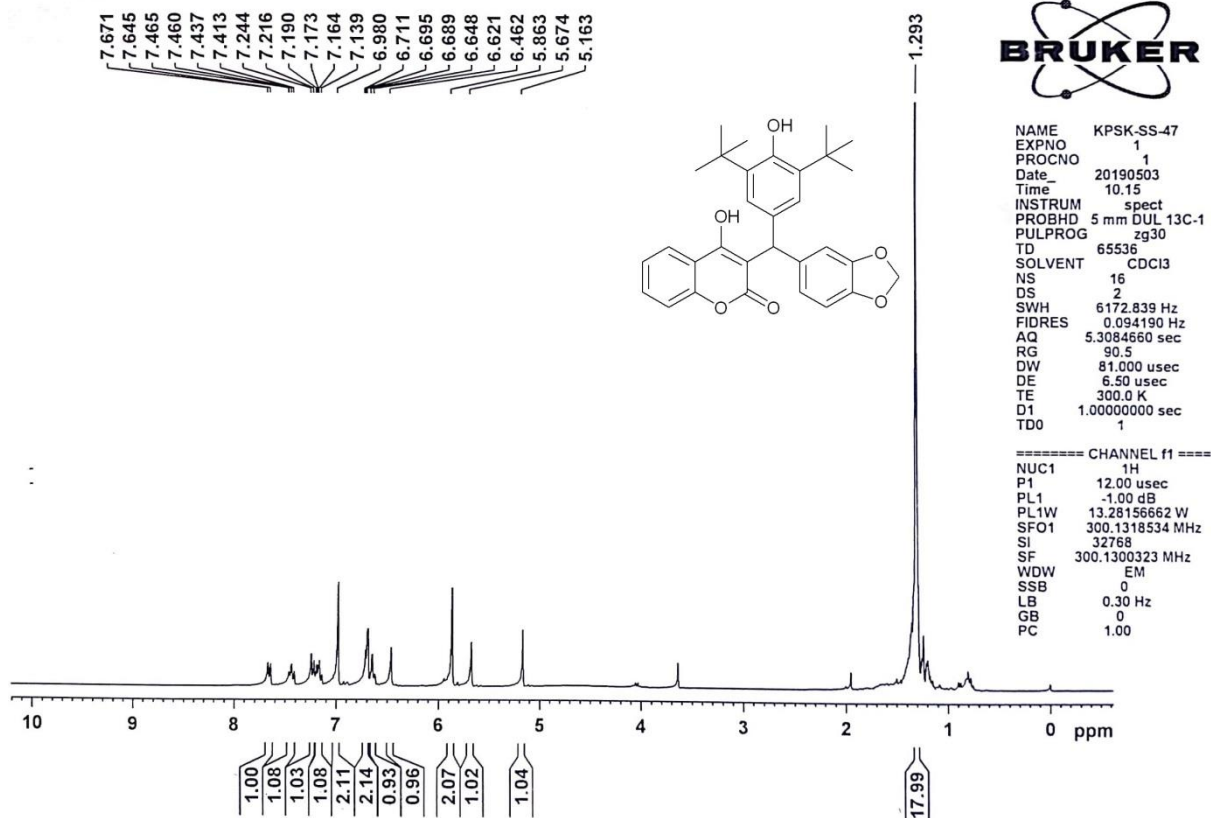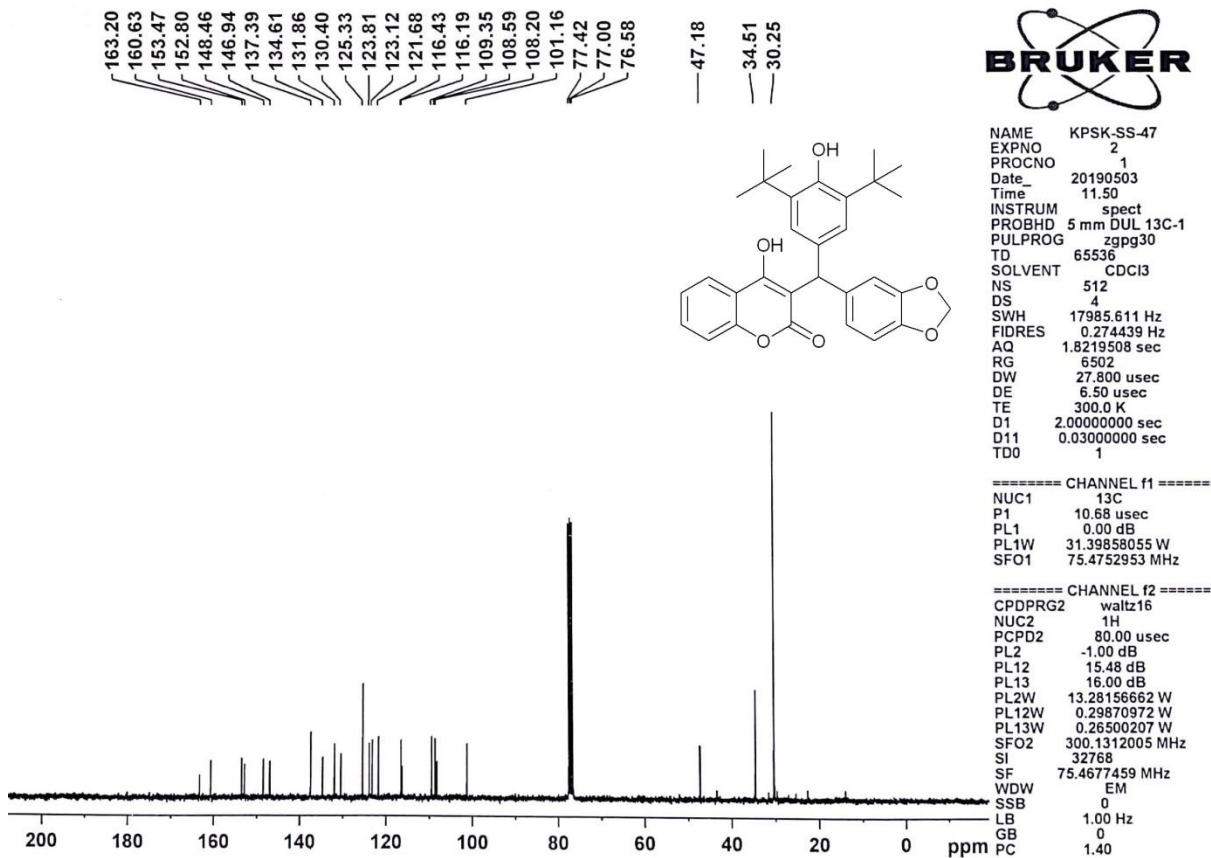

$^1\text{H}$  and  $^{13}\text{C}$  NMR for compound **5i**

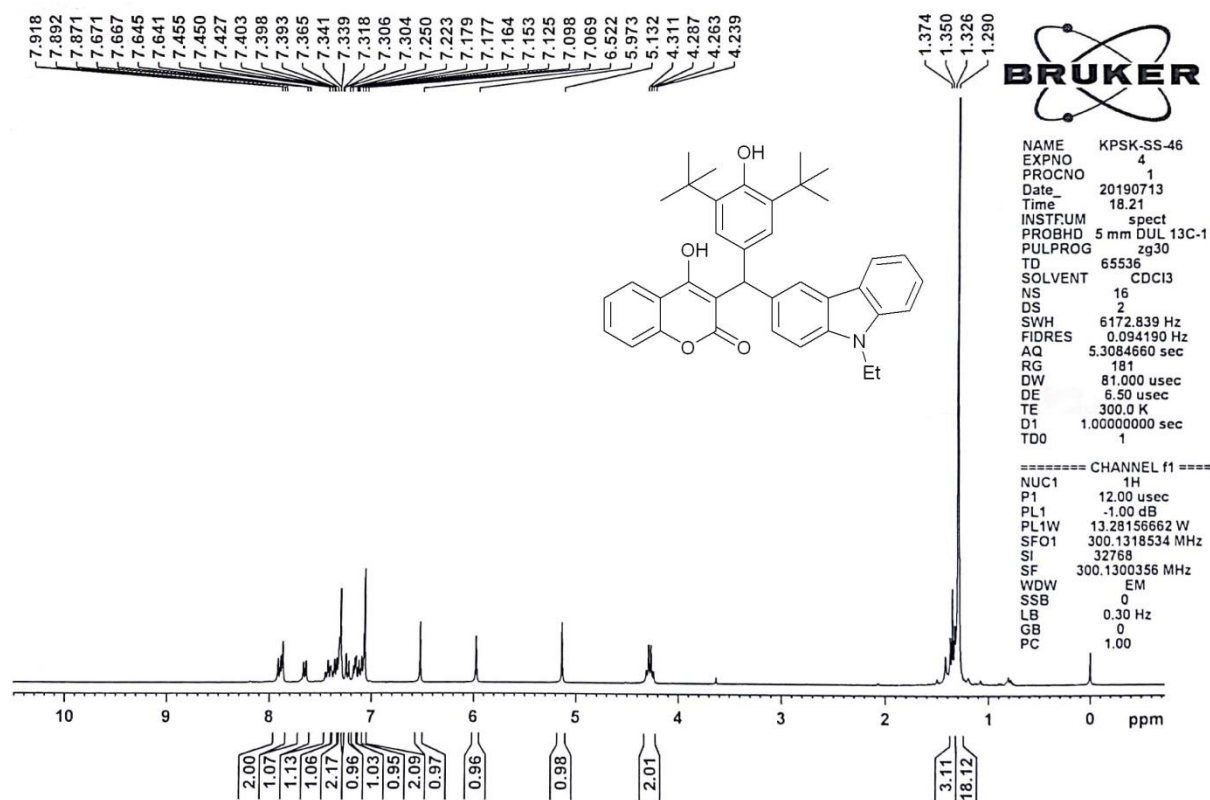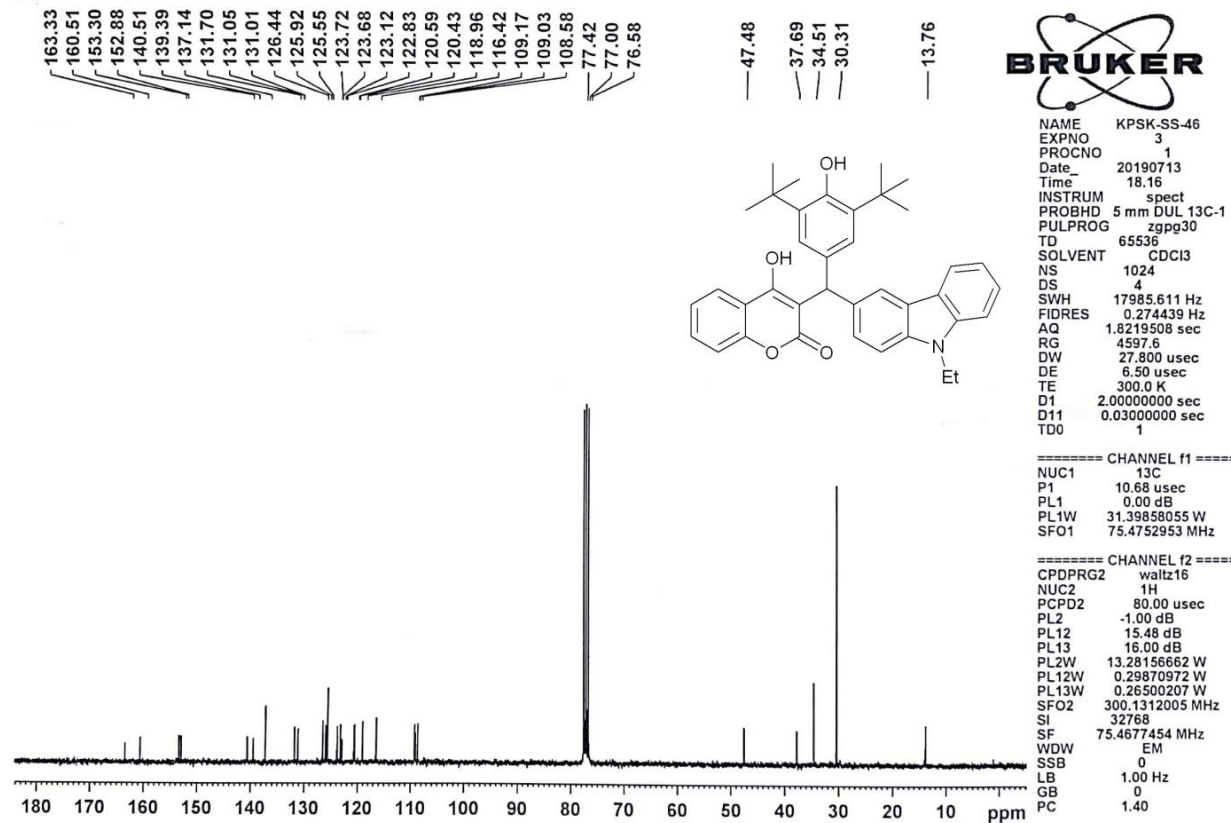

$^1\text{H}$  and  $^{13}\text{C}$  NMR for compound **5j**

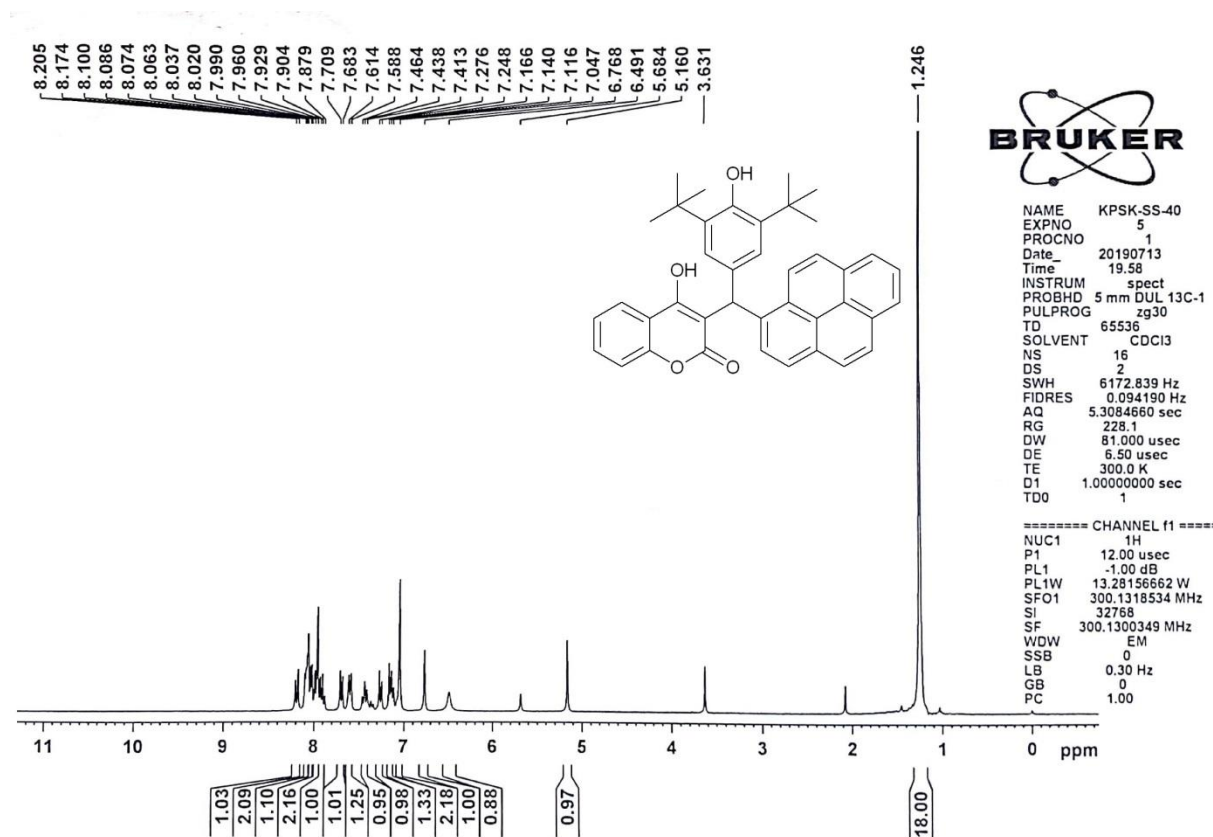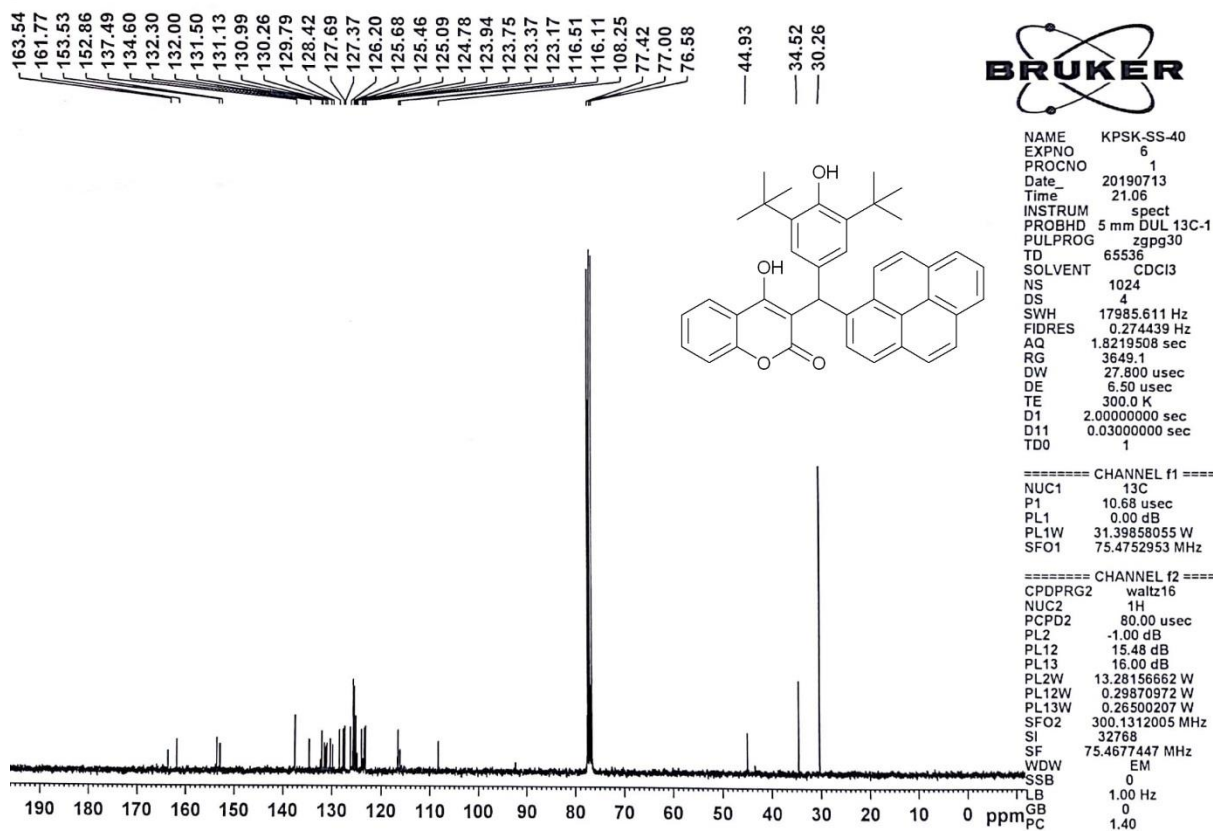

<sup>1</sup>H and <sup>13</sup>C NMR for compound **5k**

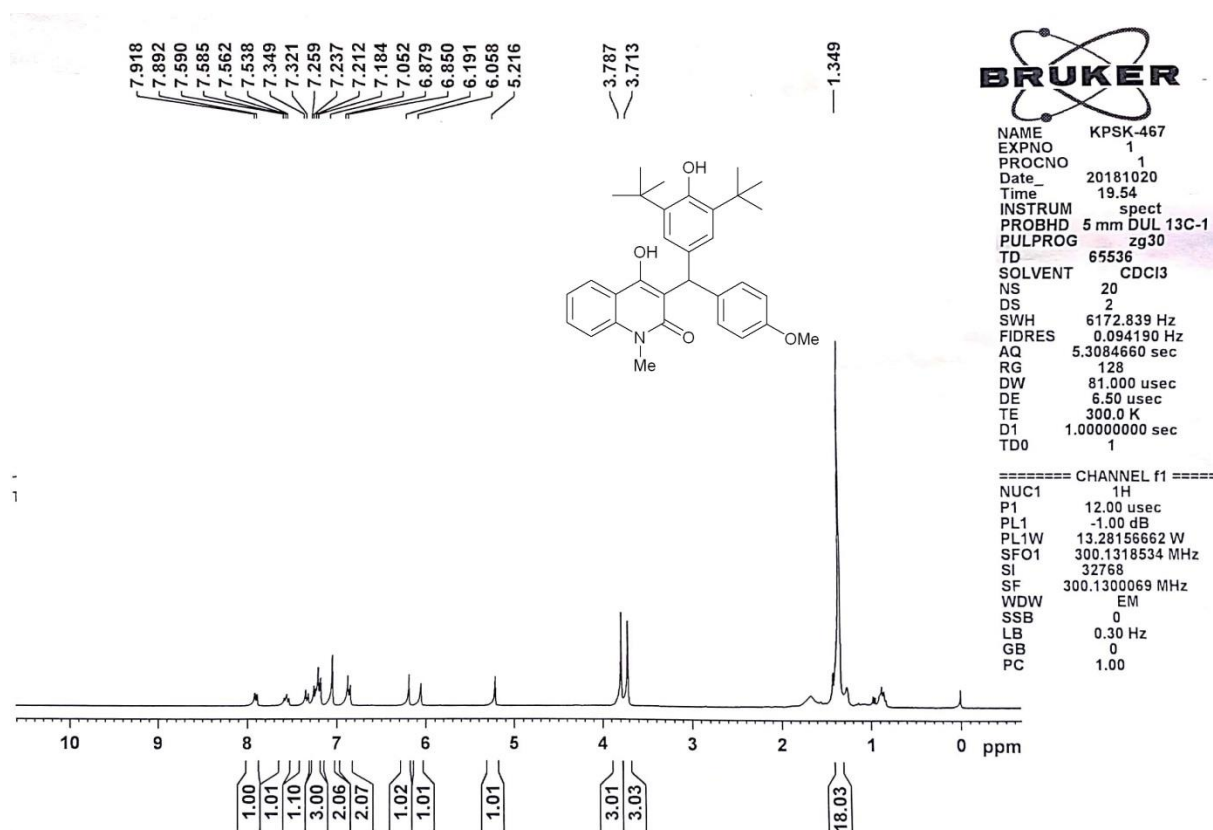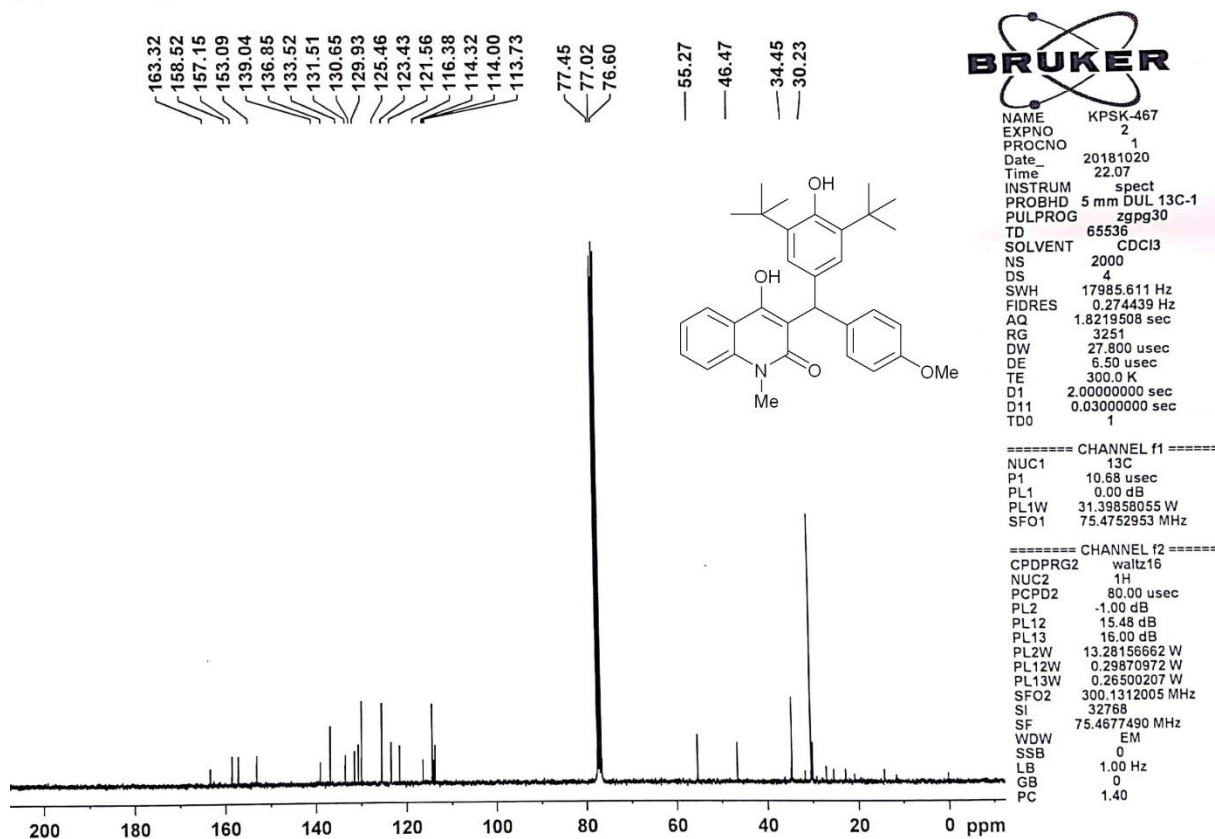



$^1\text{H}$  and  $^{13}\text{C}$  NMR for compound 7

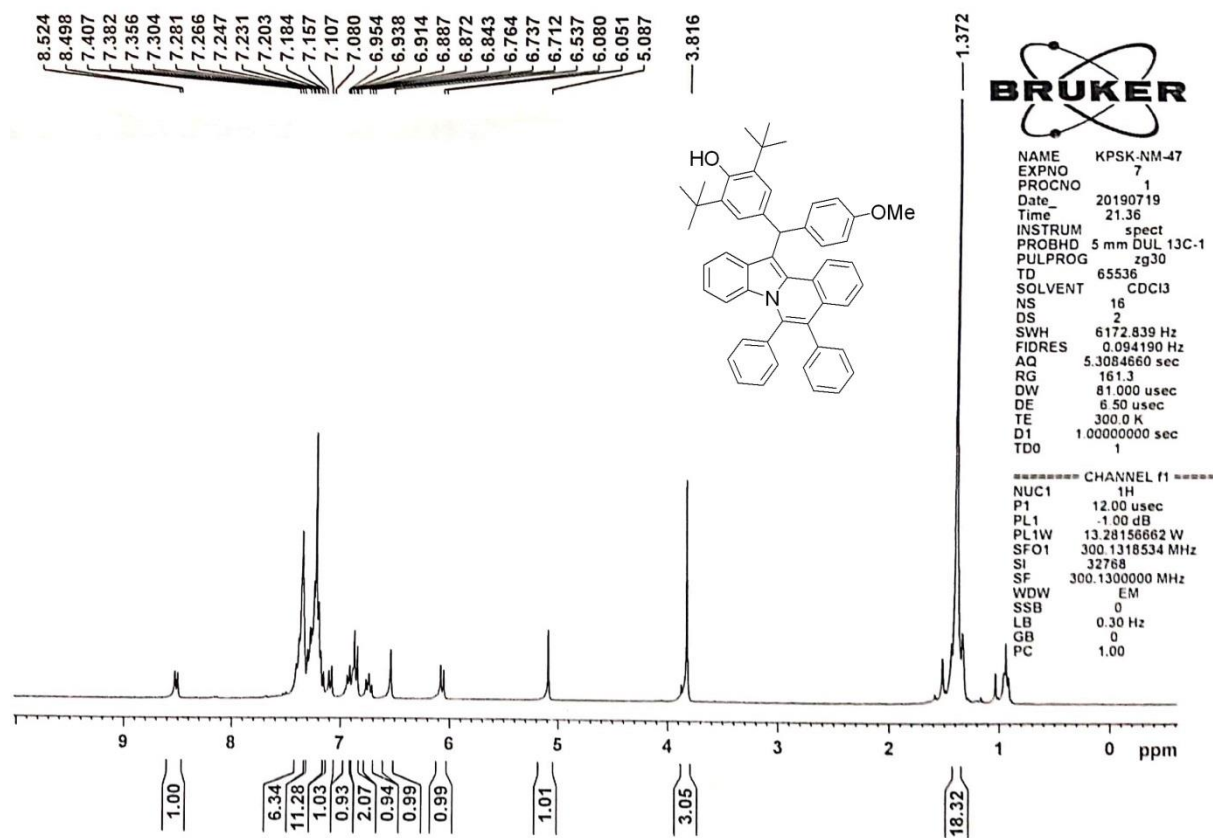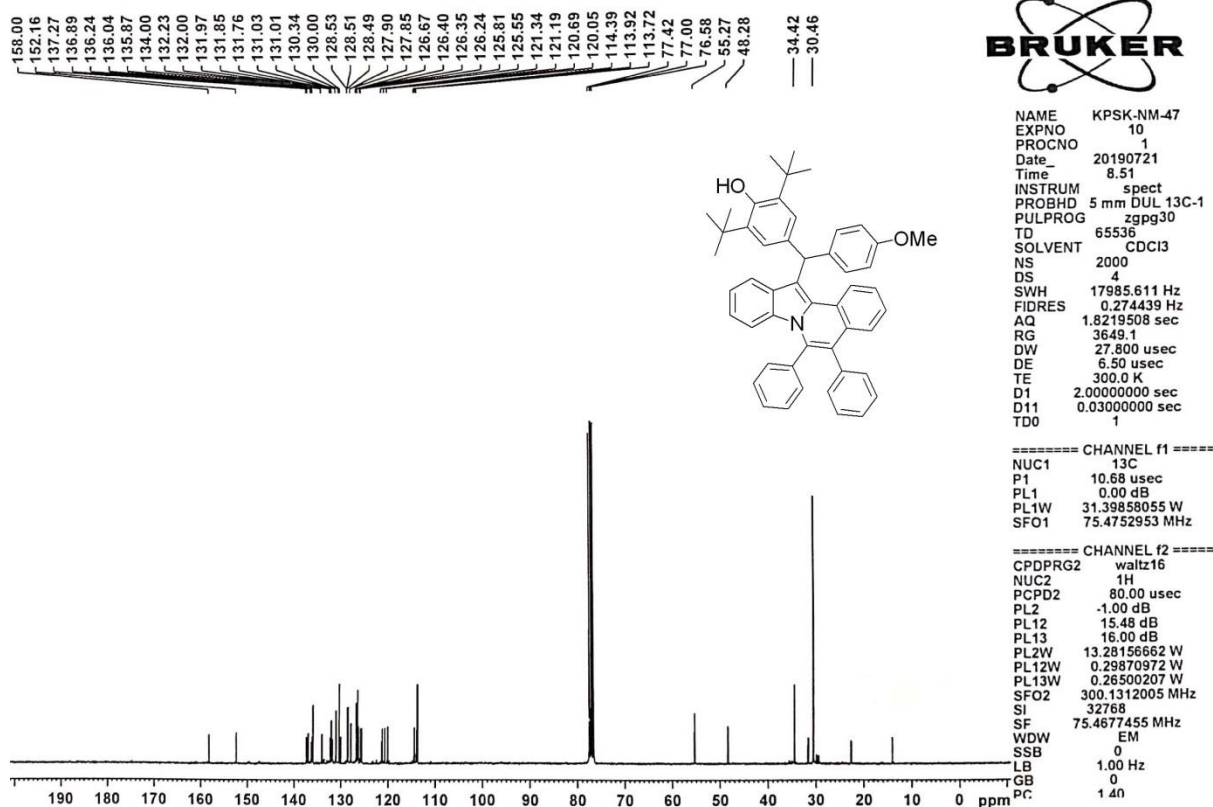

$^1\text{H}$  and  $^{13}\text{C}$  NMR for compound **8**

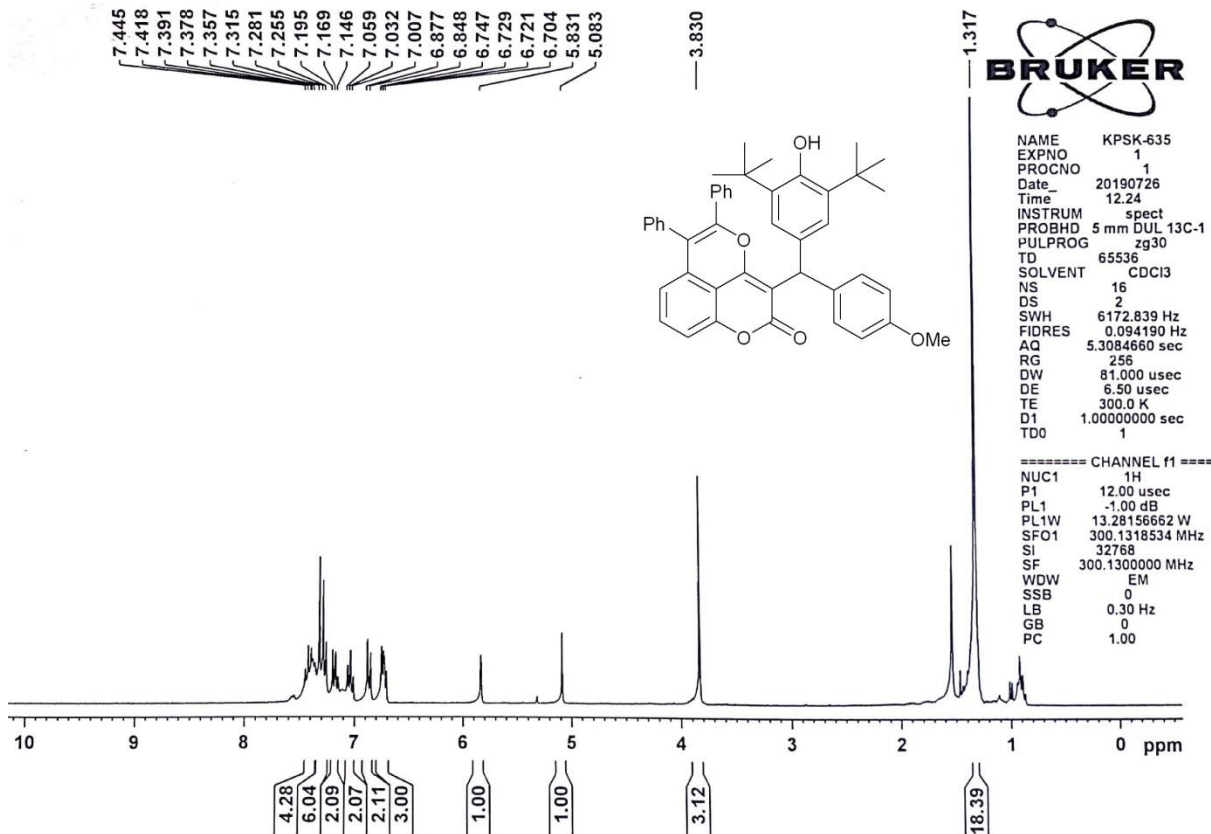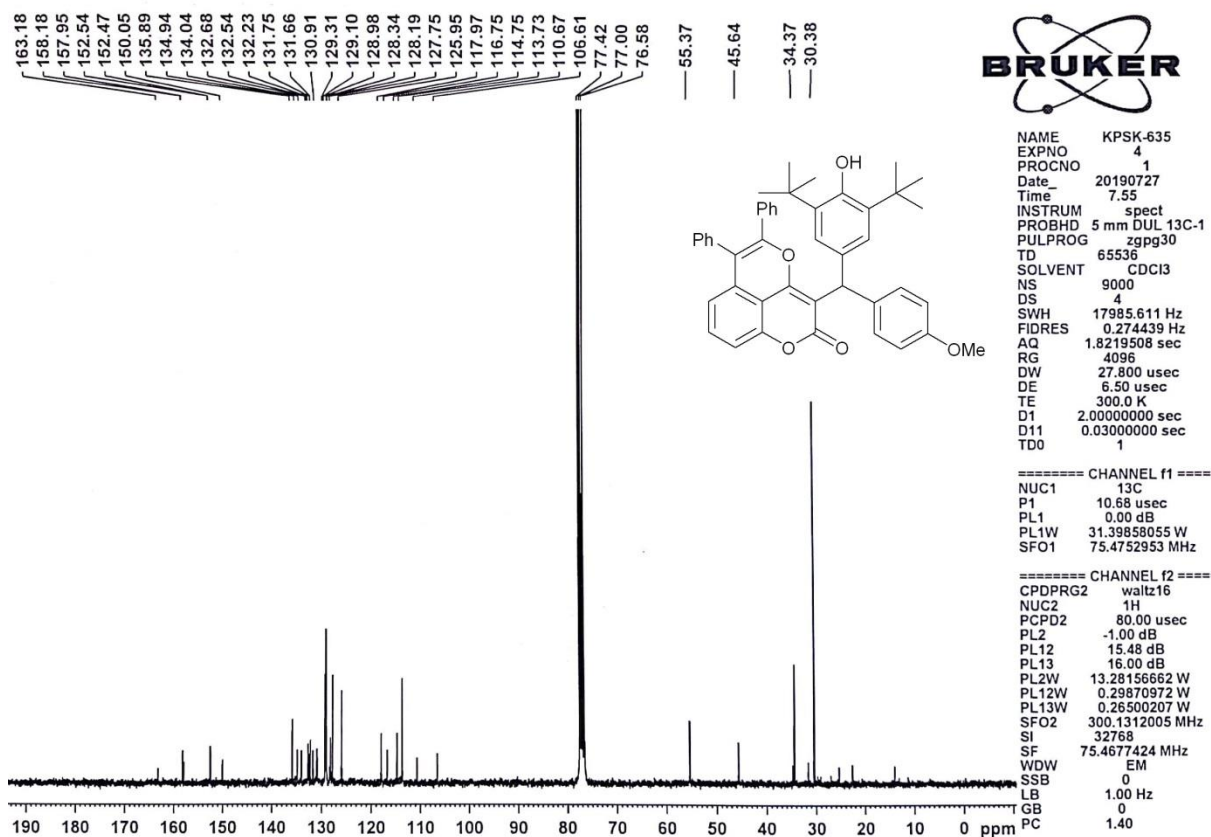

X-ray single crystal of compound **3j**.

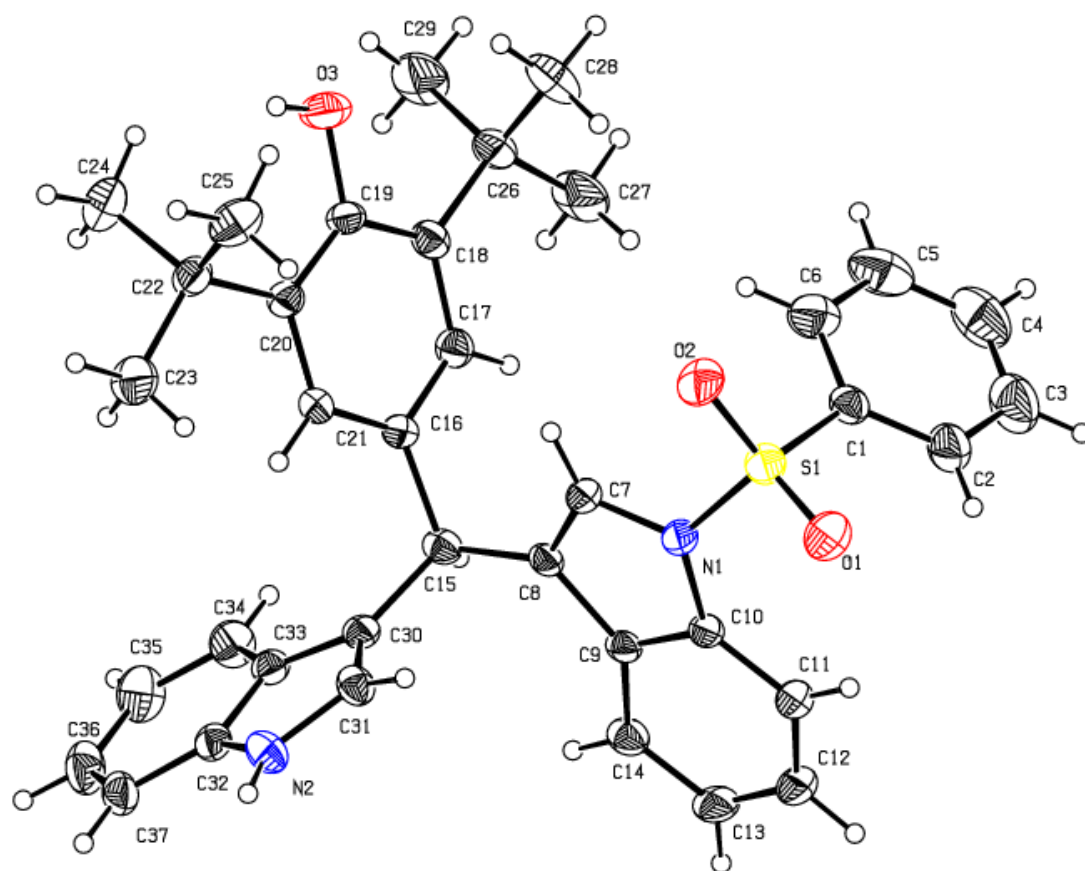

Table 1. Crystal data and structure refinement for **3j**.

|                                   |                                                                                                                           |
|-----------------------------------|---------------------------------------------------------------------------------------------------------------------------|
| Identification code               | KPSK-399                                                                                                                  |
| CCDC number                       | 2015484                                                                                                                   |
| Empirical formula                 | C <sub>37</sub> H <sub>38</sub> N <sub>2</sub> O <sub>3</sub> S                                                           |
| Formula weight                    | 590.75                                                                                                                    |
| Temperature                       | 296(2) K                                                                                                                  |
| Wavelength                        | 0.71073 Å                                                                                                                 |
| Crystal system, space group       | Monoclinic, P 2 <sub>1</sub> /n                                                                                           |
| Unit cell dimensions              | a = 12.3228(14) Å    alpha = 90 deg.<br>b = 13.5824(12) Å    beta = 104.136(3) deg.<br>c = 19.942(2) Å    gamma = 90 deg. |
| Volume                            | 3236.7(6) Å <sup>3</sup>                                                                                                  |
| Z, Calculated density             | 4, 1.212 Mg/m <sup>3</sup>                                                                                                |
| Absorption coefficient            | 0.138 mm <sup>-1</sup>                                                                                                    |
| F(000)                            | 1256                                                                                                                      |
| Crystal size                      | 0.20 x 0.20 x 0.15 mm                                                                                                     |
| Theta range for data collection   | 2.106 to 25.526 deg.                                                                                                      |
| Limiting indices                  | -14 ≤ h ≤ 14, -16 ≤ k ≤ 16, -24 ≤ l ≤ 24                                                                                  |
| Reflections collected / unique    | 33724 / 6033 [R(int) = 0.0802]                                                                                            |
| Completeness to theta = 25.242    | 100.0 %                                                                                                                   |
| Absorption correction             | Semi-empirical from equivalents                                                                                           |
| Max. and min. transmission        | 0.95 and 0.90                                                                                                             |
| Refinement method                 | Full-matrix least-squares on F <sup>2</sup>                                                                               |
| Data / restraints / parameters    | 6033 / 0 / 394                                                                                                            |
| Goodness-of-fit on F <sup>2</sup> | 1.016                                                                                                                     |
| Final R indices [I > 2σ(I)]       | R <sub>1</sub> = 0.0516, wR <sub>2</sub> = 0.0994                                                                         |

R indices (all data)       $R1 = 0.1282, wR2 = 0.1294$

Extinction coefficient      n/a

Largest diff. peak and hole      0.195 and -0.304 e.A<sup>-3</sup>

Table 2. Atomic coordinates ( $\times 10^4$ ) and equivalent isotropic displacement parameters ( $\text{\AA}^2 \times 10^3$ ) for 399.  $U(\text{eq})$  is defined as one third of the trace of the orthogonalized  $U_{ij}$  tensor.

|        | x         | y        | z        | U (eq) |
|--------|-----------|----------|----------|--------|
| C (1)  | 3718 (2)  | 4109 (2) | 297 (1)  | 43 (1) |
| C (2)  | 3927 (3)  | 3966 (2) | -340 (2) | 62 (1) |
| C (3)  | 3569 (4)  | 4647 (3) | -857 (2) | 84 (1) |
| C (4)  | 3017 (4)  | 5456 (3) | -742 (2) | 93 (1) |
| C (5)  | 2802 (3)  | 5623 (2) | -105 (2) | 85 (1) |
| C (6)  | 3153 (3)  | 4938 (2) | 422 (2)  | 68 (1) |
| C (7)  | 2207 (2)  | 2878 (2) | 1305 (1) | 39 (1) |
| C (8)  | 1217 (2)  | 2437 (2) | 1058 (1) | 34 (1) |
| C (9)  | 1330 (2)  | 1859 (2) | 468 (1)  | 36 (1) |
| C (10) | 2416 (2)  | 1976 (2) | 390 (1)  | 37 (1) |
| C (11) | 2793 (3)  | 1528 (2) | -138 (1) | 47 (1) |
| C (12) | 2034 (3)  | 948 (2)  | -586 (1) | 53 (1) |
| C (13) | 949 (3)   | 811 (2)  | -523 (1) | 53 (1) |
| C (14) | 585 (3)   | 1248 (2) | 6 (1)    | 43 (1) |
| C (15) | 198 (2)   | 2500 (2) | 1345 (1) | 37 (1) |
| C (16) | 287 (2)   | 3389 (2) | 1824 (1) | 35 (1) |
| C (17) | 190 (2)   | 4324 (2) | 1541 (1) | 40 (1) |
| C (18) | 405 (2)   | 5173 (2) | 1942 (1) | 40 (1) |
| C (19) | 725 (2)   | 5037 (2) | 2664 (1) | 38 (1) |
| C (20) | 791 (2)   | 4111 (2) | 2977 (1) | 37 (1) |
| C (21) | 572 (2)   | 3299 (2) | 2533 (1) | 36 (1) |
| C (22) | 1123 (3)  | 3957 (2) | 3766 (1) | 45 (1) |
| C (23) | 1021 (3)  | 2873 (2) | 3961 (2) | 68 (1) |
| C (24) | 358 (3)   | 4533 (2) | 4133 (2) | 66 (1) |
| C (25) | 2349 (3)  | 4264 (2) | 4059 (2) | 65 (1) |
| C (26) | 307 (3)   | 6203 (2) | 1603 (2) | 50 (1) |
| C (27) | -68 (3)   | 6126 (2) | 814 (2)  | 82 (1) |
| C (28) | 1442 (3)  | 6722 (2) | 1783 (2) | 78 (1) |
| C (29) | -568 (3)  | 6831 (2) | 1835 (2) | 82 (1) |
| C (30) | -4 (2)    | 1543 (2) | 1680 (1) | 35 (1) |
| C (31) | 774 (2)   | 852 (2)  | 1962 (1) | 41 (1) |
| C (32) | -830 (2)  | 319 (2)  | 2167 (1) | 38 (1) |
| C (33) | -1042 (2) | 1216 (2) | 1804 (1) | 37 (1) |
| C (34) | -2129 (3) | 1580 (2) | 1641 (2) | 56 (1) |
| C (35) | -2958 (3) | 1066 (3) | 1837 (2) | 67 (1) |
| C (36) | -2723 (3) | 179 (3)  | 2198 (2) | 62 (1) |
| C (37) | -1675 (3) | -208 (2) | 2362 (1) | 48 (1) |
| N (1)  | 2990 (2)  | 2594 (1) | 933 (1)  | 39 (1) |
| N (2)  | 281 (2)   | 111 (2)  | 2255 (1) | 46 (1) |
| O (1)  | 4898 (2)  | 2571 (1) | 742 (1)  | 58 (1) |
| O (2)  | 4414 (2)  | 3696 (1) | 1601 (1) | 59 (1) |
| O (3)  | 988 (2)   | 5875 (1) | 3060 (1) | 63 (1) |
| S (1)  | 4133 (1)  | 3224 (1) | 941 (1)  | 44 (1) |

Table 3. Bond lengths [Å] and angles [deg] for 3j.

---

|                 |           |
|-----------------|-----------|
| C (1) -C (2)    | 1.371 (4) |
| C (1) -C (6)    | 1.378 (4) |
| C (1) -S (1)    | 1.743 (3) |
| C (2) -C (3)    | 1.374 (4) |
| C (2) -H (2)    | 0.9300    |
| C (3) -C (4)    | 1.341 (5) |
| C (3) -H (3)    | 0.9300    |
| C (4) -C (5)    | 1.377 (5) |
| C (4) -H (4)    | 0.9300    |
| C (5) -C (6)    | 1.393 (5) |
| C (5) -H (5)    | 0.9300    |
| C (6) -H (6)    | 0.9300    |
| C (7) -C (8)    | 1.339 (3) |
| C (7) -N (1)    | 1.408 (3) |
| C (7) -H (7)    | 0.9300    |
| C (8) -C (9)    | 1.449 (3) |
| C (8) -C (15)   | 1.504 (3) |
| C (9) -C (10)   | 1.394 (4) |
| C (9) -C (14)   | 1.403 (3) |
| C (10) -C (11)  | 1.389 (3) |
| C (10) -N (1)   | 1.416 (3) |
| C (11) -C (12)  | 1.373 (4) |
| C (11) -H (11)  | 0.9300    |
| C (12) -C (13)  | 1.385 (4) |
| C (12) -H (12)  | 0.9300    |
| C (13) -C (14)  | 1.378 (4) |
| C (13) -H (13)  | 0.9300    |
| C (14) -H (14)  | 0.9300    |
| C (15) -C (30)  | 1.510 (3) |
| C (15) -C (16)  | 1.525 (3) |
| C (15) -H (15)  | 0.9800    |
| C (16) -C (21)  | 1.378 (3) |
| C (16) -C (17)  | 1.383 (3) |
| C (17) -C (18)  | 1.392 (3) |
| C (17) -H (17)  | 0.9300    |
| C (18) -C (19)  | 1.410 (4) |
| C (18) -C (26)  | 1.545 (3) |
| C (19) -O (3)   | 1.378 (3) |
| C (19) -C (20)  | 1.398 (3) |
| C (20) -C (21)  | 1.398 (3) |
| C (20) -C (22)  | 1.540 (4) |
| C (21) -H (21)  | 0.9300    |
| C (22) -C (23)  | 1.536 (4) |
| C (22) -C (25)  | 1.538 (4) |
| C (22) -C (24)  | 1.540 (4) |
| C (23) -H (23A) | 0.9600    |
| C (23) -H (23B) | 0.9600    |
| C (23) -H (23C) | 0.9600    |
| C (24) -H (24A) | 0.9600    |
| C (24) -H (24B) | 0.9600    |
| C (24) -H (24C) | 0.9600    |
| C (25) -H (25A) | 0.9600    |
| C (25) -H (25B) | 0.9600    |
| C (25) -H (25C) | 0.9600    |
| C (26) -C (28)  | 1.528 (4) |
| C (26) -C (27)  | 1.531 (4) |
| C (26) -C (29)  | 1.534 (4) |
| C (27) -H (27A) | 0.9600    |
| C (27) -H (27B) | 0.9600    |
| C (27) -H (27C) | 0.9600    |
| C (28) -H (28A) | 0.9600    |
| C (28) -H (28B) | 0.9600    |
| C (28) -H (28C) | 0.9600    |
| C (29) -H (29A) | 0.9600    |

|                 |             |
|-----------------|-------------|
| C (29) -H (29B) | 0.9600      |
| C (29) -H (29C) | 0.9600      |
| C (30) -C (31)  | 1.362 (4)   |
| C (30) -C (33)  | 1.431 (4)   |
| C (31) -N (2)   | 1.377 (3)   |
| C (31) -H (31)  | 0.9300      |
| C (32) -N (2)   | 1.366 (3)   |
| C (32) -C (37)  | 1.395 (4)   |
| C (32) -C (33)  | 1.409 (3)   |
| C (33) -C (34)  | 1.390 (4)   |
| C (34) -C (35)  | 1.371 (4)   |
| C (34) -H (34)  | 0.9300      |
| C (35) -C (36)  | 1.397 (4)   |
| C (35) -H (35)  | 0.9300      |
| C (36) -C (37)  | 1.358 (4)   |
| C (36) -H (36)  | 0.9300      |
| C (37) -H (37)  | 0.9300      |
| N (1) -S (1)    | 1.645 (2)   |
| N (2) -H (2A)   | 0.8600      |
| O (1) -S (1)    | 1.4201 (19) |
| O (2) -S (1)    | 1.4289 (18) |
| O (3) -H (3A)   | 0.8200      |

|                        |           |
|------------------------|-----------|
| C (2) -C (1) -C (6)    | 120.1 (3) |
| C (2) -C (1) -S (1)    | 119.8 (2) |
| C (6) -C (1) -S (1)    | 120.0 (2) |
| C (1) -C (2) -C (3)    | 120.0 (3) |
| C (1) -C (2) -H (2)    | 120.0     |
| C (3) -C (2) -H (2)    | 120.0     |
| C (4) -C (3) -C (2)    | 120.5 (4) |
| C (4) -C (3) -H (3)    | 119.8     |
| C (2) -C (3) -H (3)    | 119.8     |
| C (3) -C (4) -C (5)    | 120.8 (4) |
| C (3) -C (4) -H (4)    | 119.6     |
| C (5) -C (4) -H (4)    | 119.6     |
| C (4) -C (5) -C (6)    | 119.5 (4) |
| C (4) -C (5) -H (5)    | 120.3     |
| C (6) -C (5) -H (5)    | 120.3     |
| C (1) -C (6) -C (5)    | 119.1 (3) |
| C (1) -C (6) -H (6)    | 120.5     |
| C (5) -C (6) -H (6)    | 120.5     |
| C (8) -C (7) -N (1)    | 111.3 (2) |
| C (8) -C (7) -H (7)    | 124.3     |
| N (1) -C (7) -H (7)    | 124.3     |
| C (7) -C (8) -C (9)    | 106.4 (2) |
| C (7) -C (8) -C (15)   | 127.1 (2) |
| C (9) -C (8) -C (15)   | 126.5 (2) |
| C (10) -C (9) -C (14)  | 119.1 (2) |
| C (10) -C (9) -C (8)   | 108.3 (2) |
| C (14) -C (9) -C (8)   | 132.6 (3) |
| C (11) -C (10) -C (9)  | 122.8 (2) |
| C (11) -C (10) -N (1)  | 130.0 (3) |
| C (9) -C (10) -N (1)   | 107.2 (2) |
| C (12) -C (11) -C (10) | 116.4 (3) |
| C (12) -C (11) -H (11) | 121.8     |
| C (10) -C (11) -H (11) | 121.8     |
| C (11) -C (12) -C (13) | 122.4 (3) |
| C (11) -C (12) -H (12) | 118.8     |
| C (13) -C (12) -H (12) | 118.8     |
| C (14) -C (13) -C (12) | 120.9 (3) |
| C (14) -C (13) -H (13) | 119.6     |
| C (12) -C (13) -H (13) | 119.6     |
| C (13) -C (14) -C (9)  | 118.4 (3) |
| C (13) -C (14) -H (14) | 120.8     |
| C (9) -C (14) -H (14)  | 120.8     |
| C (8) -C (15) -C (30)  | 111.3 (2) |
| C (8) -C (15) -C (16)  | 110.1 (2) |
| C (30) -C (15) -C (16) | 113.5 (2) |



|                          |           |
|--------------------------|-----------|
| C (8) -C (15) -H (15)    | 107.2     |
| C (30) -C (15) -H (15)   | 107.2     |
| C (16) -C (15) -H (15)   | 107.2     |
| C (21) -C (16) -C (17)   | 118.4 (2) |
| C (21) -C (16) -C (15)   | 122.3 (2) |
| C (17) -C (16) -C (15)   | 119.1 (2) |
| C (16) -C (17) -C (18)   | 122.9 (2) |
| C (16) -C (17) -H (17)   | 118.6     |
| C (18) -C (17) -H (17)   | 118.6     |
| C (17) -C (18) -C (19)   | 116.4 (2) |
| C (17) -C (18) -C (26)   | 121.1 (2) |
| C (19) -C (18) -C (26)   | 122.5 (2) |
| O (3) -C (19) -C (20)    | 120.5 (2) |
| O (3) -C (19) -C (18)    | 116.5 (2) |
| C (20) -C (19) -C (18)   | 123.1 (2) |
| C (21) -C (20) -C (19)   | 116.5 (2) |
| C (21) -C (20) -C (22)   | 120.1 (2) |
| C (19) -C (20) -C (22)   | 123.4 (2) |
| C (16) -C (21) -C (20)   | 122.8 (2) |
| C (16) -C (21) -H (21)   | 118.6     |
| C (20) -C (21) -H (21)   | 118.6     |
| C (23) -C (22) -C (25)   | 107.2 (2) |
| C (23) -C (22) -C (20)   | 111.8 (2) |
| C (25) -C (22) -C (20)   | 110.0 (2) |
| C (23) -C (22) -C (24)   | 105.6 (2) |
| C (25) -C (22) -C (24)   | 109.9 (2) |
| C (20) -C (22) -C (24)   | 112.1 (2) |
| C (22) -C (23) -H (23A)  | 109.5     |
| C (22) -C (23) -H (23B)  | 109.5     |
| H (23A) -C (23) -H (23B) | 109.5     |
| C (22) -C (23) -H (23C)  | 109.5     |
| H (23A) -C (23) -H (23C) | 109.5     |
| H (23B) -C (23) -H (23C) | 109.5     |
| C (22) -C (24) -H (24A)  | 109.5     |
| C (22) -C (24) -H (24B)  | 109.5     |
| H (24A) -C (24) -H (24B) | 109.5     |
| C (22) -C (24) -H (24C)  | 109.5     |
| H (24A) -C (24) -H (24C) | 109.5     |
| H (24B) -C (24) -H (24C) | 109.5     |
| C (22) -C (25) -H (25A)  | 109.5     |
| C (22) -C (25) -H (25B)  | 109.5     |
| H (25A) -C (25) -H (25B) | 109.5     |
| C (22) -C (25) -H (25C)  | 109.5     |
| H (25A) -C (25) -H (25C) | 109.5     |
| H (25B) -C (25) -H (25C) | 109.5     |
| C (28) -C (26) -C (27)   | 107.6 (3) |
| C (28) -C (26) -C (29)   | 110.1 (3) |
| C (27) -C (26) -C (29)   | 106.9 (3) |
| C (28) -C (26) -C (18)   | 110.2 (2) |
| C (27) -C (26) -C (18)   | 111.1 (2) |
| C (29) -C (26) -C (18)   | 110.9 (2) |
| C (26) -C (27) -H (27A)  | 109.5     |
| C (26) -C (27) -H (27B)  | 109.5     |
| H (27A) -C (27) -H (27B) | 109.5     |
| C (26) -C (27) -H (27C)  | 109.5     |
| H (27A) -C (27) -H (27C) | 109.5     |
| H (27B) -C (27) -H (27C) | 109.5     |
| C (26) -C (28) -H (28A)  | 109.5     |
| C (26) -C (28) -H (28B)  | 109.5     |
| H (28A) -C (28) -H (28B) | 109.5     |
| C (26) -C (28) -H (28C)  | 109.5     |
| H (28A) -C (28) -H (28C) | 109.5     |
| H (28B) -C (28) -H (28C) | 109.5     |
| C (26) -C (29) -H (29A)  | 109.5     |
| C (26) -C (29) -H (29B)  | 109.5     |
| H (29A) -C (29) -H (29B) | 109.5     |
| C (26) -C (29) -H (29C)  | 109.5     |
| H (29A) -C (29) -H (29C) | 109.5     |

|                          |             |
|--------------------------|-------------|
| H (29B) -C (29) -H (29C) | 109.5       |
| C (31) -C (30) -C (33)   | 106.4 (2)   |
| C (31) -C (30) -C (15)   | 126.9 (3)   |
| C (33) -C (30) -C (15)   | 126.6 (2)   |
| C (30) -C (31) -N (2)    | 109.8 (3)   |
| C (30) -C (31) -H (31)   | 125.1       |
| N (2) -C (31) -H (31)    | 125.1       |
| N (2) -C (32) -C (37)    | 130.7 (3)   |
| N (2) -C (32) -C (33)    | 107.3 (2)   |
| C (37) -C (32) -C (33)   | 122.0 (3)   |
| C (34) -C (33) -C (32)   | 118.4 (3)   |
| C (34) -C (33) -C (30)   | 134.4 (2)   |
| C (32) -C (33) -C (30)   | 107.3 (2)   |
| C (35) -C (34) -C (33)   | 119.7 (3)   |
| C (35) -C (34) -H (34)   | 120.2       |
| C (33) -C (34) -H (34)   | 120.2       |
| C (34) -C (35) -C (36)   | 120.7 (3)   |
| C (34) -C (35) -H (35)   | 119.7       |
| C (36) -C (35) -H (35)   | 119.7       |
| C (37) -C (36) -C (35)   | 121.6 (3)   |
| C (37) -C (36) -H (36)   | 119.2       |
| C (35) -C (36) -H (36)   | 119.2       |
| C (36) -C (37) -C (32)   | 117.7 (3)   |
| C (36) -C (37) -H (37)   | 121.2       |
| C (32) -C (37) -H (37)   | 121.2       |
| C (7) -N (1) -C (10)     | 106.7 (2)   |
| C (7) -N (1) -S (1)      | 123.29 (17) |
| C (10) -N (1) -S (1)     | 125.59 (17) |
| C (32) -N (2) -C (31)    | 109.1 (2)   |
| C (32) -N (2) -H (2A)    | 125.4       |
| C (31) -N (2) -H (2A)    | 125.4       |
| C (19) -O (3) -H (3A)    | 109.5       |
| O (1) -S (1) -O (2)      | 120.70 (13) |
| O (1) -S (1) -N (1)      | 107.31 (11) |
| O (2) -S (1) -N (1)      | 104.83 (11) |
| O (1) -S (1) -C (1)      | 108.68 (13) |
| O (2) -S (1) -C (1)      | 109.34 (12) |
| N (1) -S (1) -C (1)      | 104.80 (12) |

---

Symmetry transformations used to generate equivalent atoms:
